# Supplementary material for: New archetypes in self-assembled Phe-Phe motif induced nanostructures from nucleoside conjugated-diphenylalanines
Source: Royal Society of Chemistry journal article supplement (doi:10.1039/c7nr08436f), 2018-01-01
Supplement: c7nr08436f1.pdf [file c7nr08436f1.pdf]

## Supporting Information

# New archetypes in self-assembled Phe-Phe motif induced nanostructures from nucleoside conjugated-diphenylalanines

Dhrubajyoti Datta<sup>a\*,†</sup>, Omshanker Tiwari<sup>a†</sup>, Krishna N Ganesh<sup>a\*</sup>

<sup>a</sup>Department of Chemistry, Indian Institute of Science Education and Research (IISER) Pune  
Dr. Homi Bhabha Road, Pashan, Pune, Maharashtra, 411008, India.

## Table of Contents

|                                                                                                      | Page No |                                                                                                 | Page No |
|------------------------------------------------------------------------------------------------------|---------|-------------------------------------------------------------------------------------------------|---------|
| <sup>1</sup> H-/ <sup>13</sup> C -NMR of <b>2</b> (Boc-Phe-Phe-Propyne)                              | S-1     | <sup>1</sup> H-/ <sup>13</sup> C -NMR of <b>Fmoc-Phe-Phe-tz-A</b> <sup>N(Boc)<sub>2</sub></sup> | S-25    |
| <sup>1</sup> H-/ <sup>13</sup> C -NMR of <b>4</b> (Boc-Leu-Leu-Propyne)                              | S-2     | PXRD of peptides                                                                                | S-26    |
| <sup>1</sup> H-/ <sup>13</sup> C -NMR of <b>5</b>                                                    | S-3     | Contact angle measurement                                                                       | S-27    |
| IR of <b>5</b>                                                                                       | S-4     | FTIR of peptides                                                                                | S-28    |
| <sup>1</sup> H-/ <sup>13</sup> C -NMR of <b>6</b>                                                    | S-5     | FESEM images                                                                                    | S-29    |
| IR of <b>6</b>                                                                                       | S-6     | AFM images                                                                                      | S-31    |
| <sup>1</sup> H-/ <sup>13</sup> C -NMR of <b>7</b> (Boc-Phe-Phe-tz-A <sup>N(Boc)<sub>2</sub></sup> )  | S-7     | Height profiles from AFM                                                                        | S-32    |
| <sup>1</sup> H-/ <sup>13</sup> C -NMR of <b>8</b> (Boc-Phe-Phe-tz-A <sup>NH<sub>2</sub></sup> )      | S-8     | HRTEM images                                                                                    | S-33    |
| <sup>1</sup> H-/ <sup>13</sup> C -NMR of <b>9</b> (H-Phe-Phe-tz-A <sup>NH<sub>2</sub></sup> )        | S-9     | DLS studies                                                                                     | S-34    |
| <sup>1</sup> H-/ <sup>13</sup> C -NMR of <b>10</b> (Boc-Leu-Leu-tz-A <sup>N(Boc)<sub>2</sub></sup> ) | S-10    | Concentration and time dependent studies of <b>7</b>                                            | S-35    |
| <sup>1</sup> H-/ <sup>13</sup> C -NMR of <b>12</b> (Boc-Phe-Phe-am-A <sup>N(Boc)<sub>2</sub></sup> ) | S-11    | Height profile of <b>7</b> from AFM                                                             | S-36    |
| <sup>1</sup> H-/ <sup>13</sup> C -NMR of <b>13</b>                                                   | S-12    | Concentration dependent study of <b>8</b>                                                       | S-36    |
| IR of <b>13</b>                                                                                      | S-13    | Effects of external stimuli on peptide <b>7</b> and <b>12</b>                                   | S-37    |
| <sup>1</sup> H-/ <sup>13</sup> C -NMR of <b>14</b>                                                   | S-14    | TGA analysis data of peptide <b>7</b> and <b>12</b>                                             | S-40    |
| IR of <b>14</b>                                                                                      | S-15    | MALDI of peptide <b>7</b> after thermal stability test                                          | S-40    |
| <sup>1</sup> H-/ <sup>13</sup> C -NMR of <b>15</b> (Boc-Phe-Phe-tz-U)                                | S-16    | Solvent dependent morphology of peptide <b>7</b>                                                | S-41    |
| <sup>1</sup> H-/ <sup>13</sup> C -NMR of <b>16</b> (Boc-Phe-Phe-tz-T)                                | S-17    | SEM and AFM of <b>Boc-Phe-Phe-OMe</b>                                                           | S-42    |
| <sup>1</sup> H-/ <sup>13</sup> C -NMR of <b>Boc-Lys(Cl-Cbz)-Lys(Cl-Cbz)-OMe</b>                      | S-18    | Confocal images of <b>CF</b> encapsulated spheres                                               | S-43    |
| <sup>1</sup> H-/ <sup>13</sup> C -NMR of <b>Boc-Lys-Lys-OMe</b>                                      | S-19    | Dicationic and TBAB mediated release of <b>CF</b>                                               | S-43    |
| <sup>1</sup> H-/ <sup>13</sup> C -NMR of <b>Boc-Phe-Phe-OMe</b>                                      | S-20    | EDX images of peptide <b>7</b> and <b>12</b>                                                    | S-44    |
| <sup>1</sup> H-/ <sup>13</sup> C -NMR of <b>Boc-Phe-Phe-OH</b>                                       | S-21    | Synthesis of <b>Boc-Lys-Lys-OMe</b>                                                             | S-45    |
| <sup>1</sup> H-/ <sup>13</sup> C -NMR of <b>Boc-Leu-Leu-OH</b>                                       | S-22    | Synthesis of <b>Fmoc-Phe-Phe-tz-A</b> <sup>N(Boc)<sub>2</sub></sup>                             | S-46    |
| <sup>1</sup> H-/ <sup>13</sup> C -NMR of <b>Fmoc-Phe-Phe-Propyne</b>                                 | S-23    | References                                                                                      | S-48    |
| <sup>1</sup> H-/ <sup>13</sup> C -NMR of <b>Fmoc-Phe-Phe-tz-A</b> <sup>NH<sub>2</sub></sup>          | S-24    |                                                                                                 |         |

CF= Carboxyfluorescein

## Peptides:

**1** = Boc-Phe-Phe-OH, **2** = Boc-Phe-Phe-Propyne, **4** = Boc-Leu-Leu-Propyne, **7** = Boc-Phe-Phe-tz-A<sup>N(Boc)<sub>2</sub></sup>, **8** = Boc-Phe-Phe-tz-A<sup>NH<sub>2</sub></sup>, **9** = H-Phe-Phe-tz-A<sup>NH<sub>2</sub></sup>, **10** = Boc-Leu-Leu-tz-A<sup>N(Boc)<sub>2</sub></sup>, **12** = Boc-Phe-Phe-am-A<sup>N(Boc)<sub>2</sub></sup>, **15** = Boc-Phe-Phe-tz-U, **16** = Boc-Phe-Phe-tz-T; **S7** = Fmoc-Phe-Phe-tz-A<sup>N(Boc)<sub>2</sub></sup>

(A)

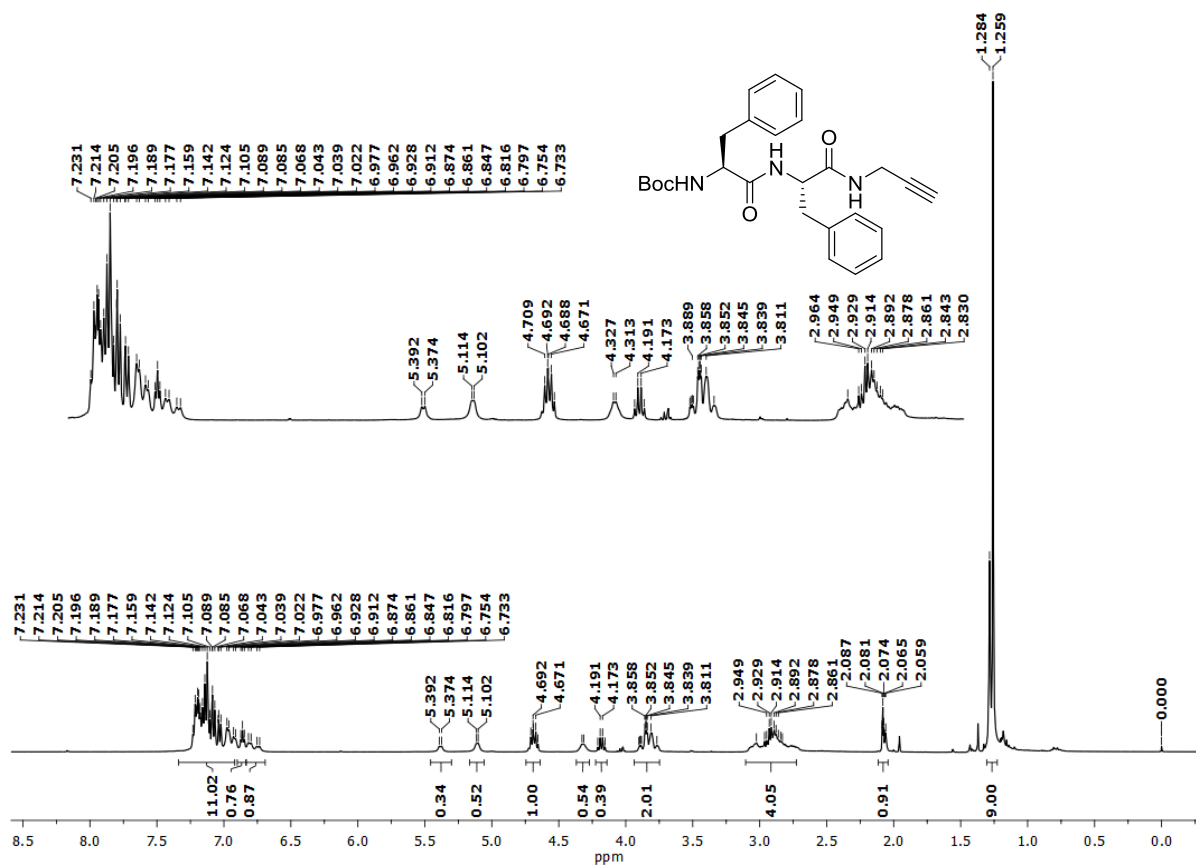

(B)

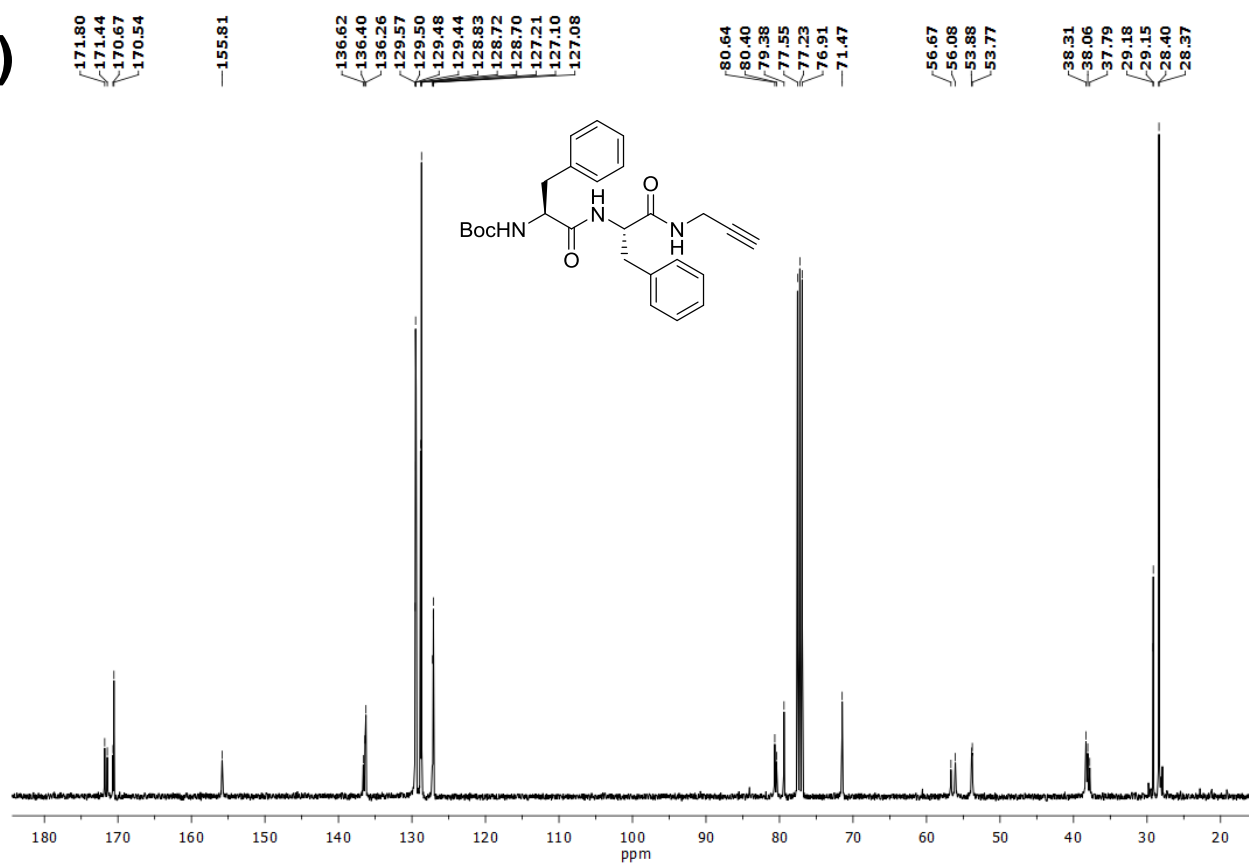

Figure S1: (A) <sup>1</sup>H-NMR and (B) <sup>13</sup>C-NMR spectra of peptide 2 (Boc-Phe-Phe-Propyne).

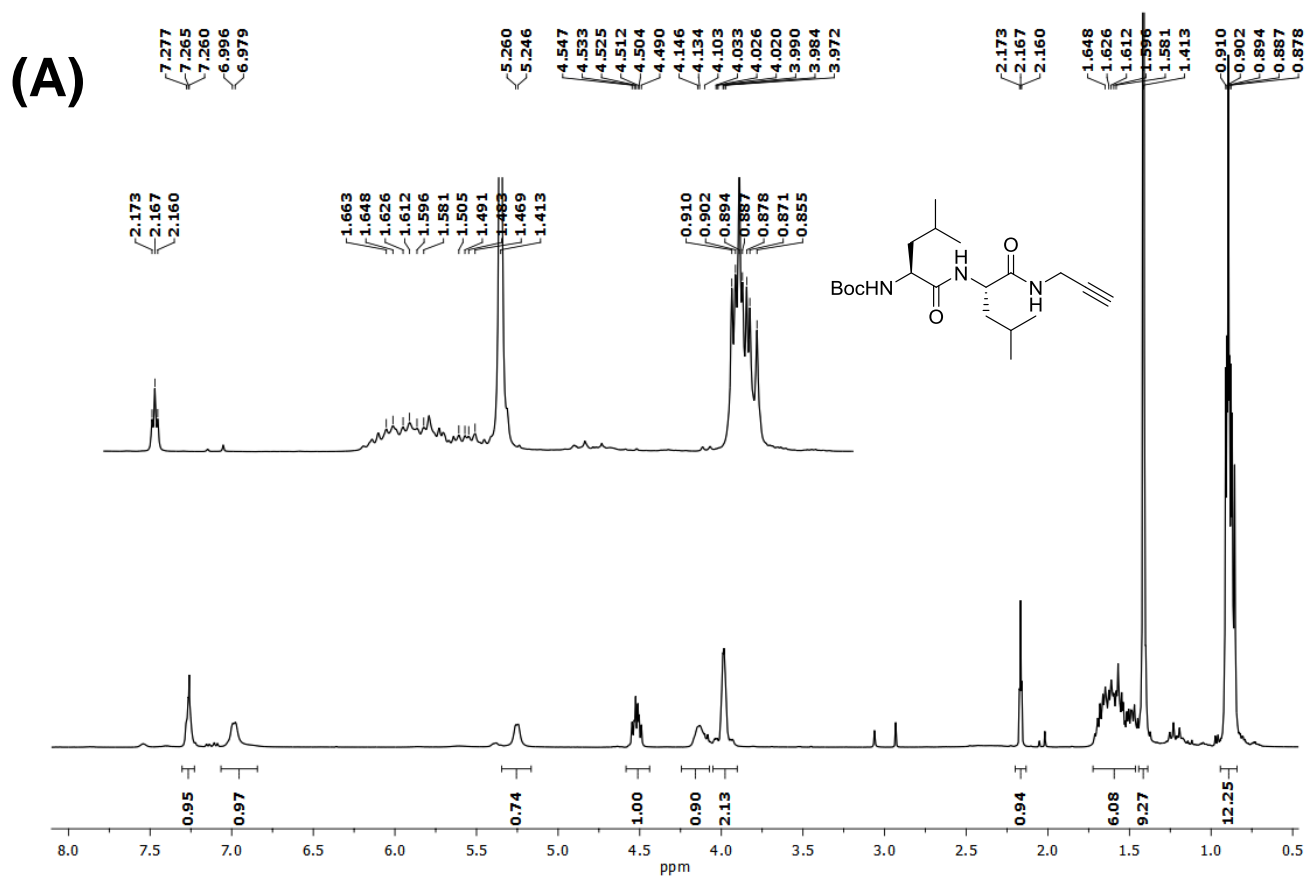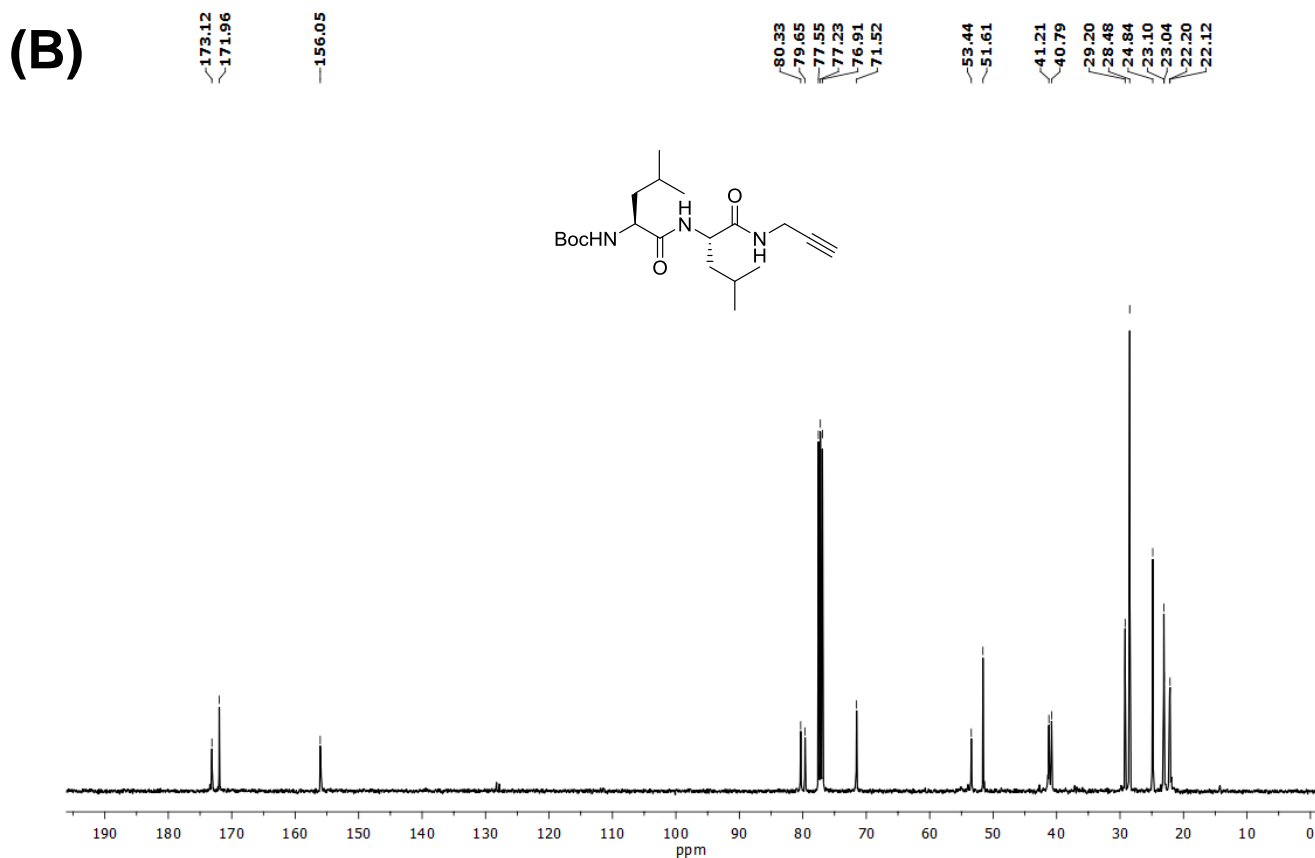

**Figure S2:** (A) <sup>1</sup>H-NMR (B) <sup>13</sup>C-NMR spectra of peptide 4 (Boc-Leu-Leu-Propyne).

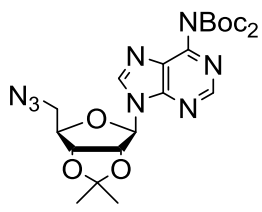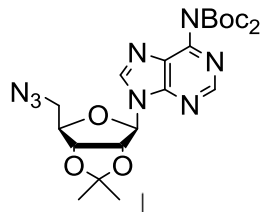

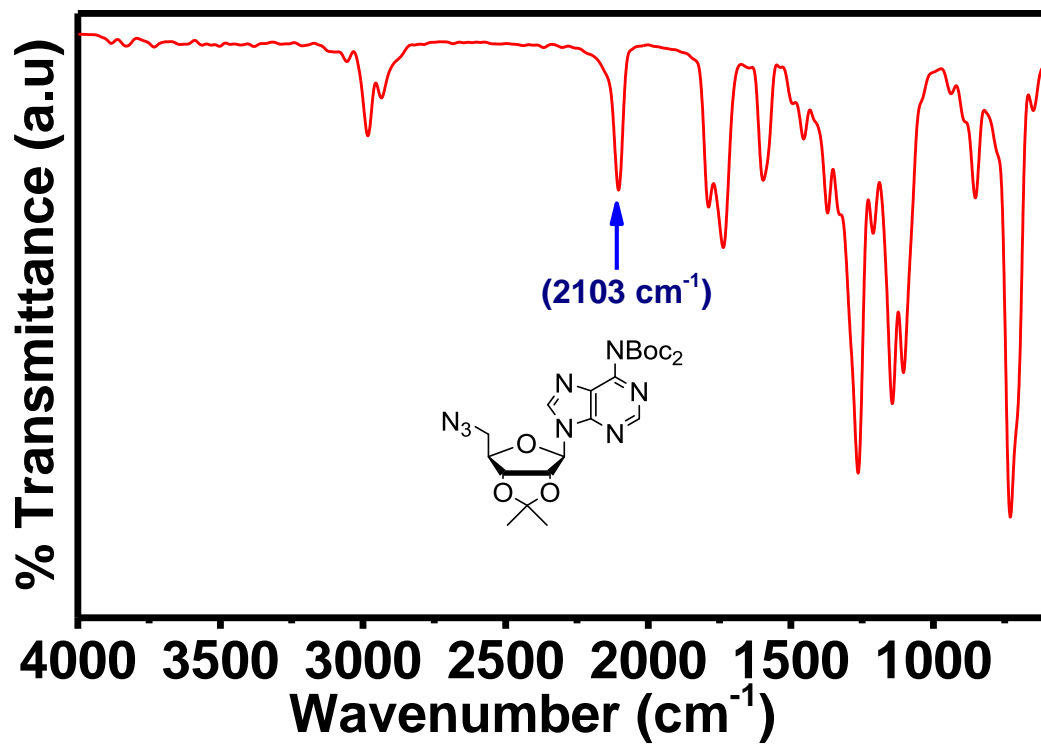

**Figure S4:** ATR-IR spectrum of **5**.

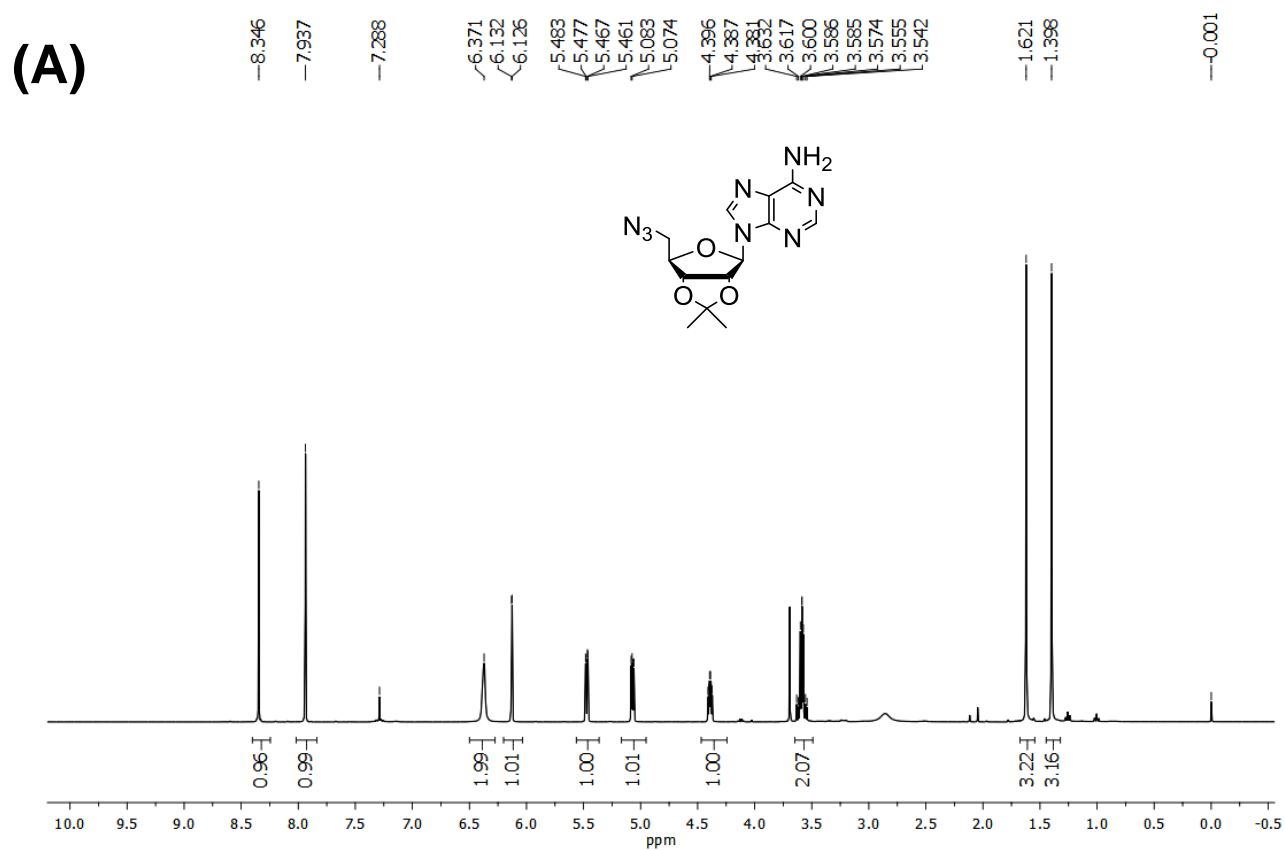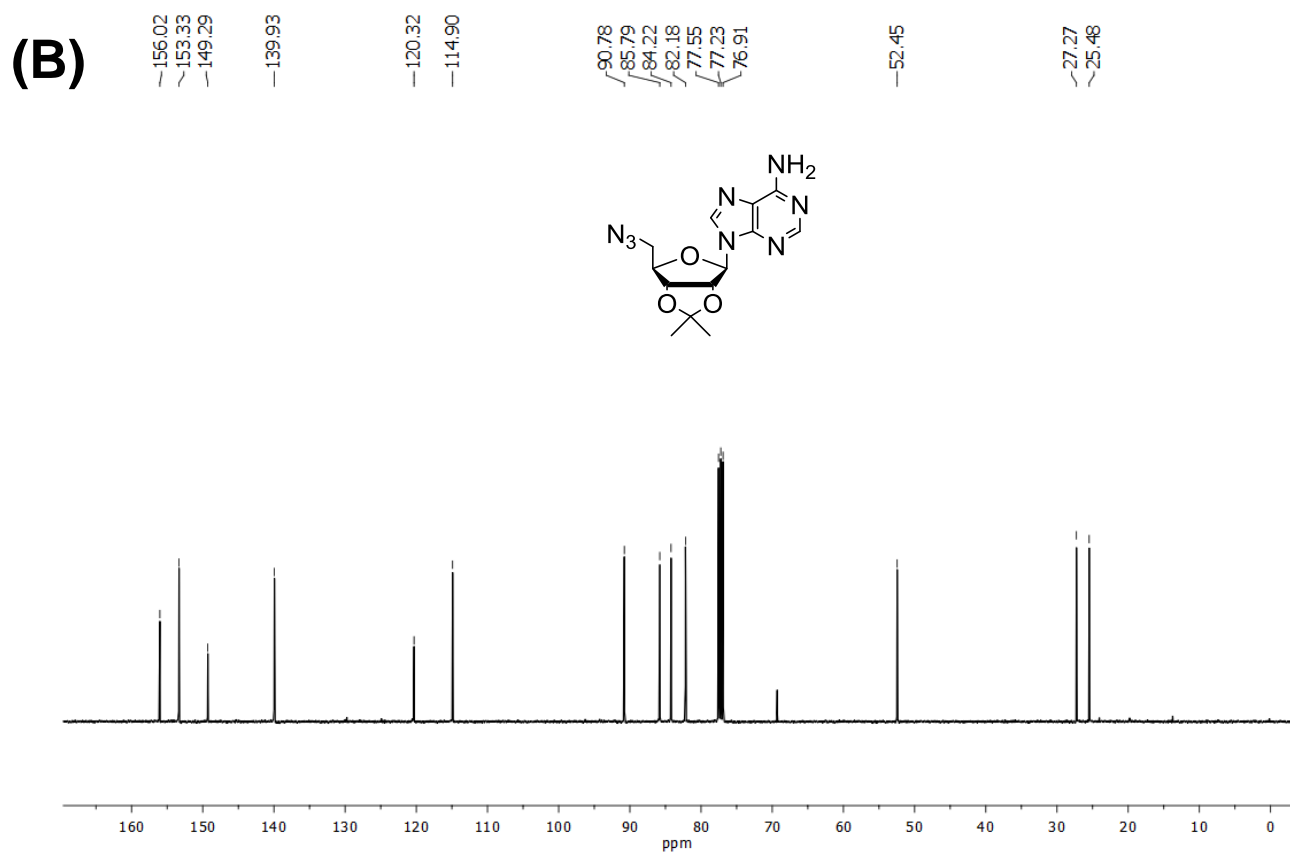

**Figure S5: (A) <sup>1</sup>H-NMR and (B) <sup>13</sup>C-NMR of spectra of 6.**

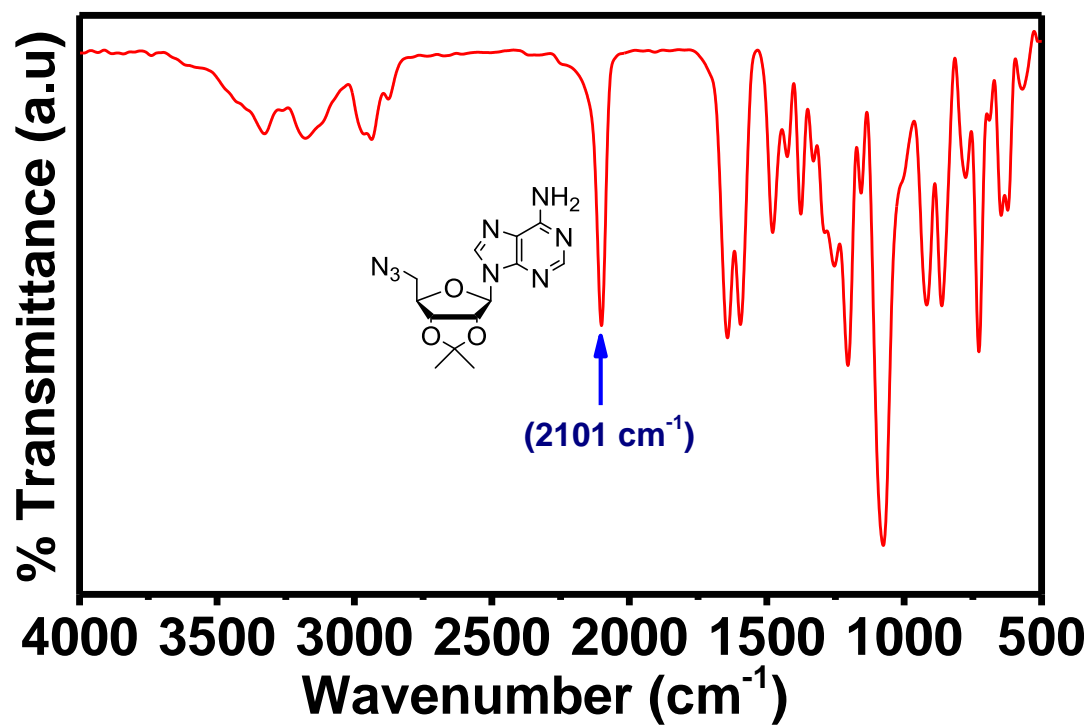

**Figure S6:** ATR-IR spectrum of crude **6**.

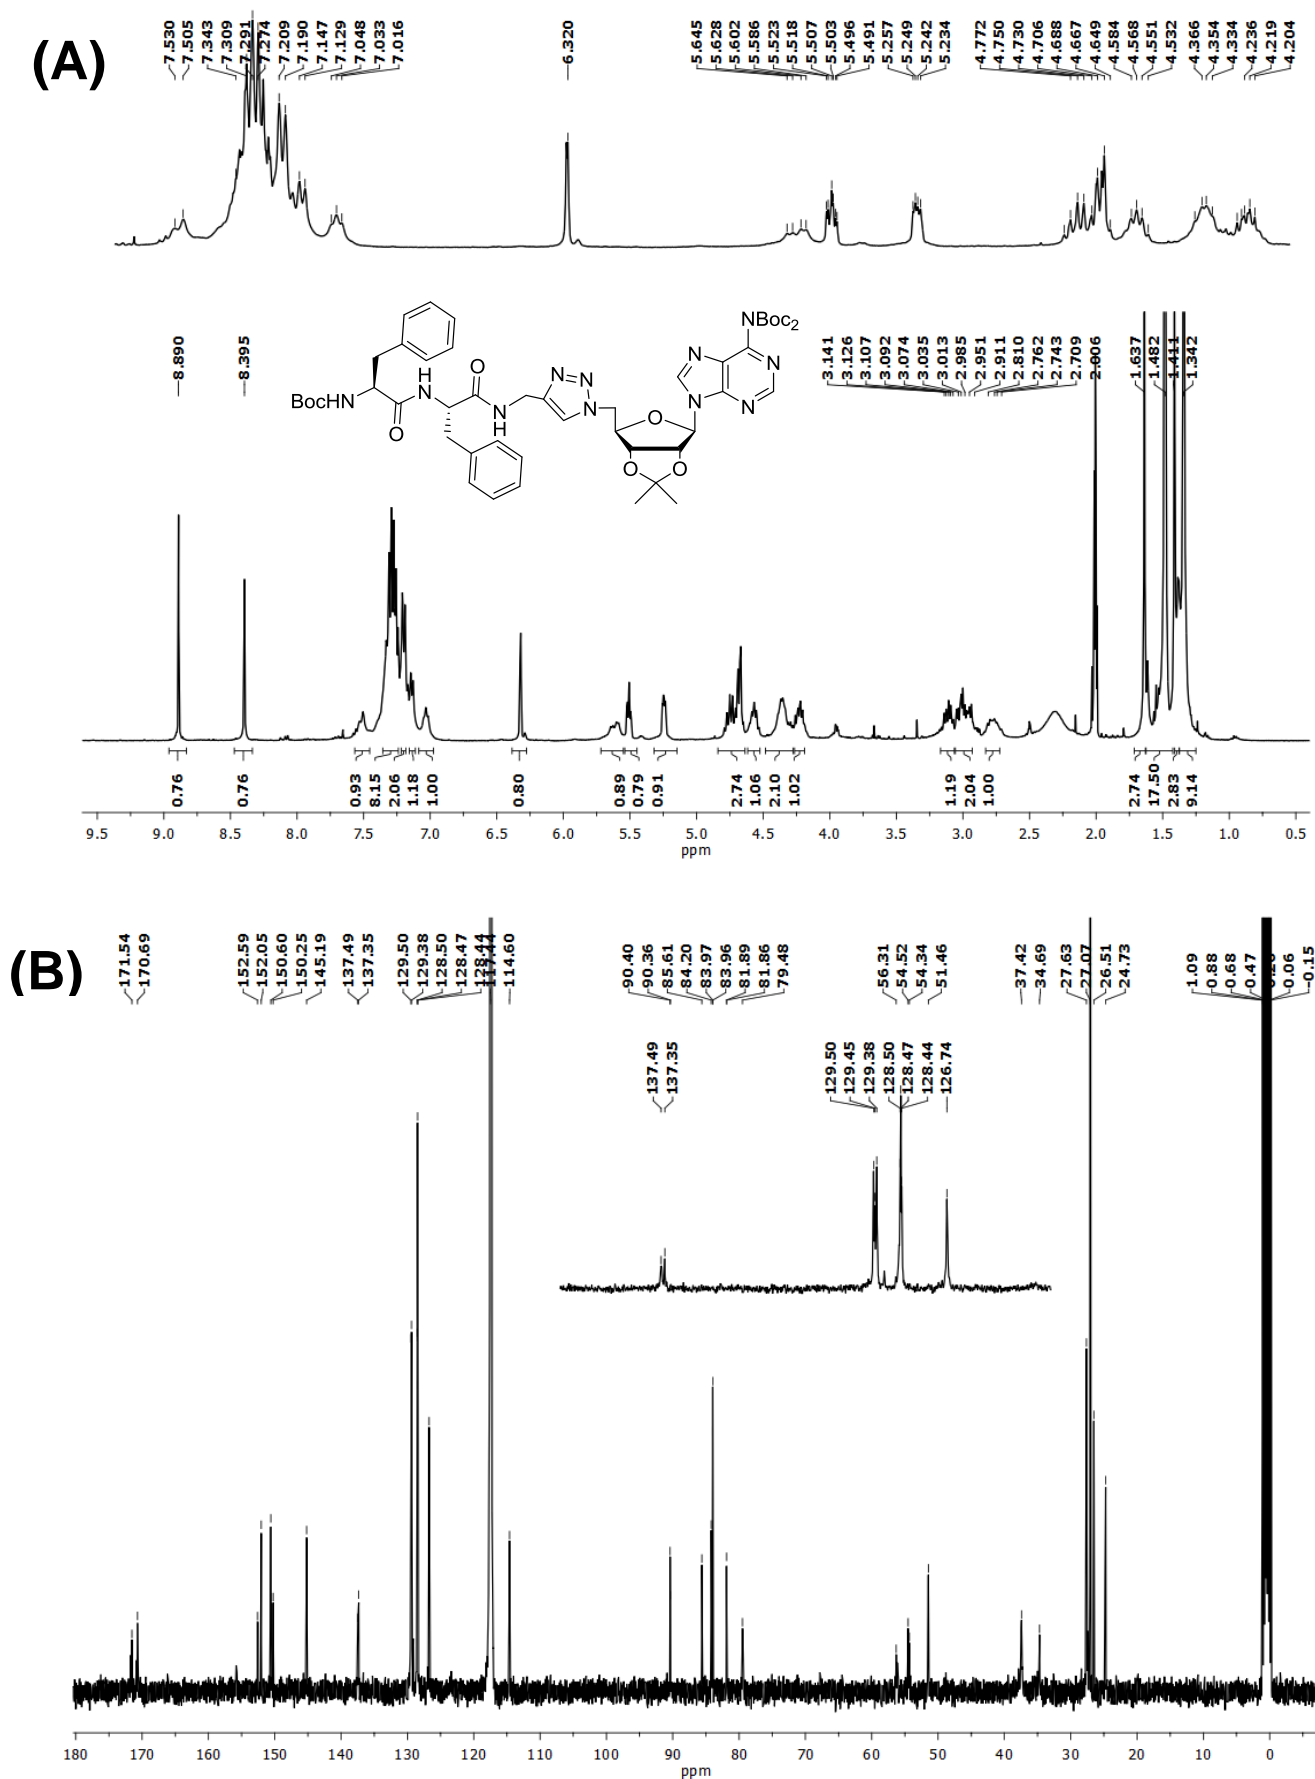

**Figure S7:** (A)  $^1\text{H}$ -NMR (B)  $^{13}\text{C}$ -NMR spectra of peptide 7 (Boc-Phe-Phe-*t*z-A<sup>N(Boc)<sub>2</sub></sup>).

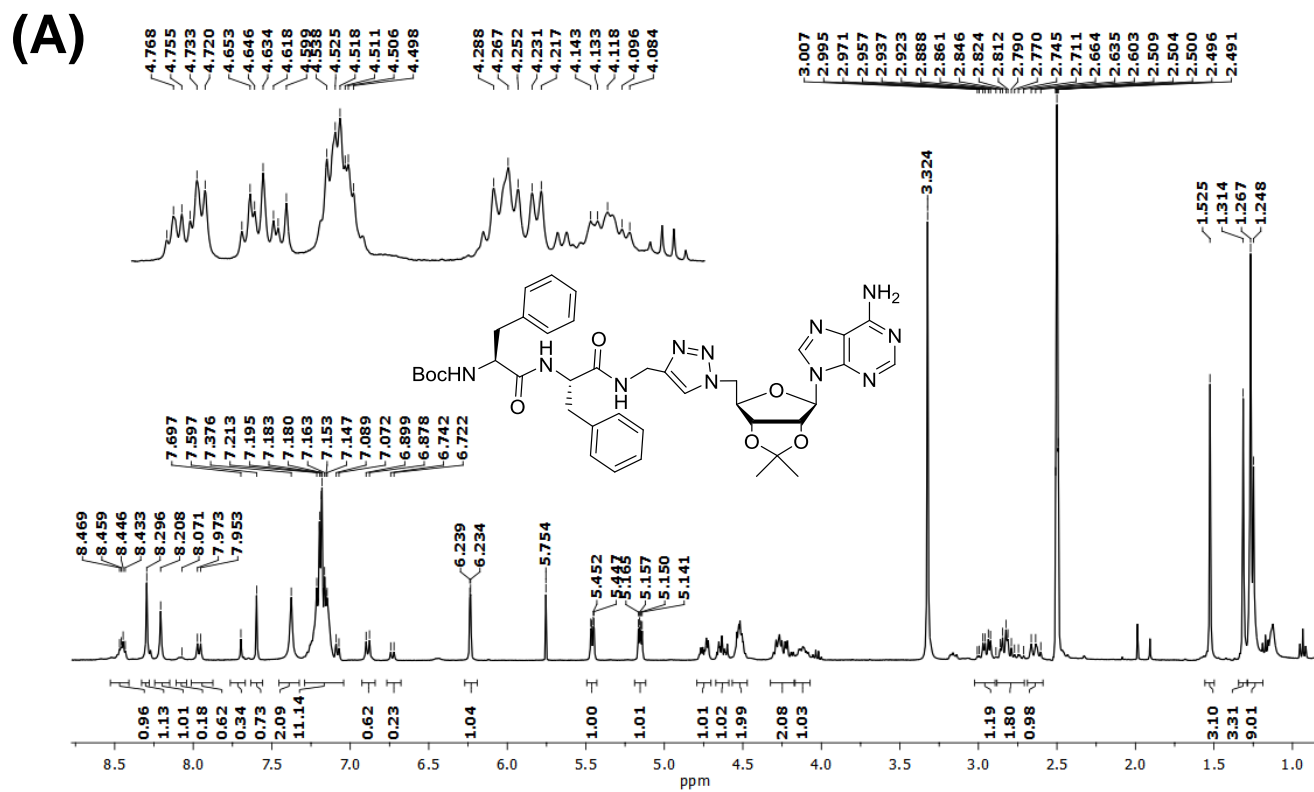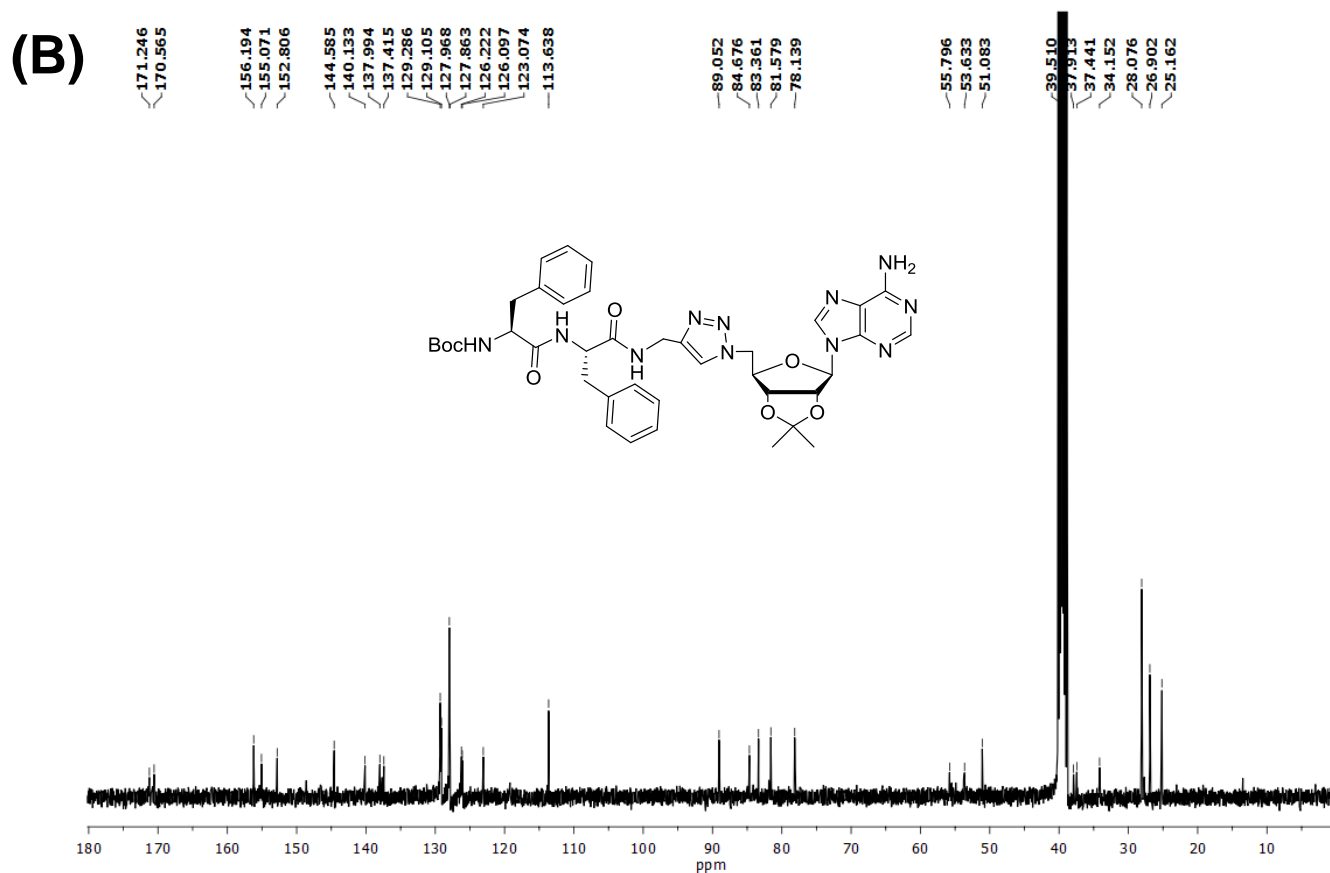

**Figure S8: (A) <sup>1</sup>H-NMR (B) <sup>13</sup>C-NMR spectra of peptide 8 (Boc-Phe-Phe-*tz*-A<sup>NH<sub>2</sub></sup>).**



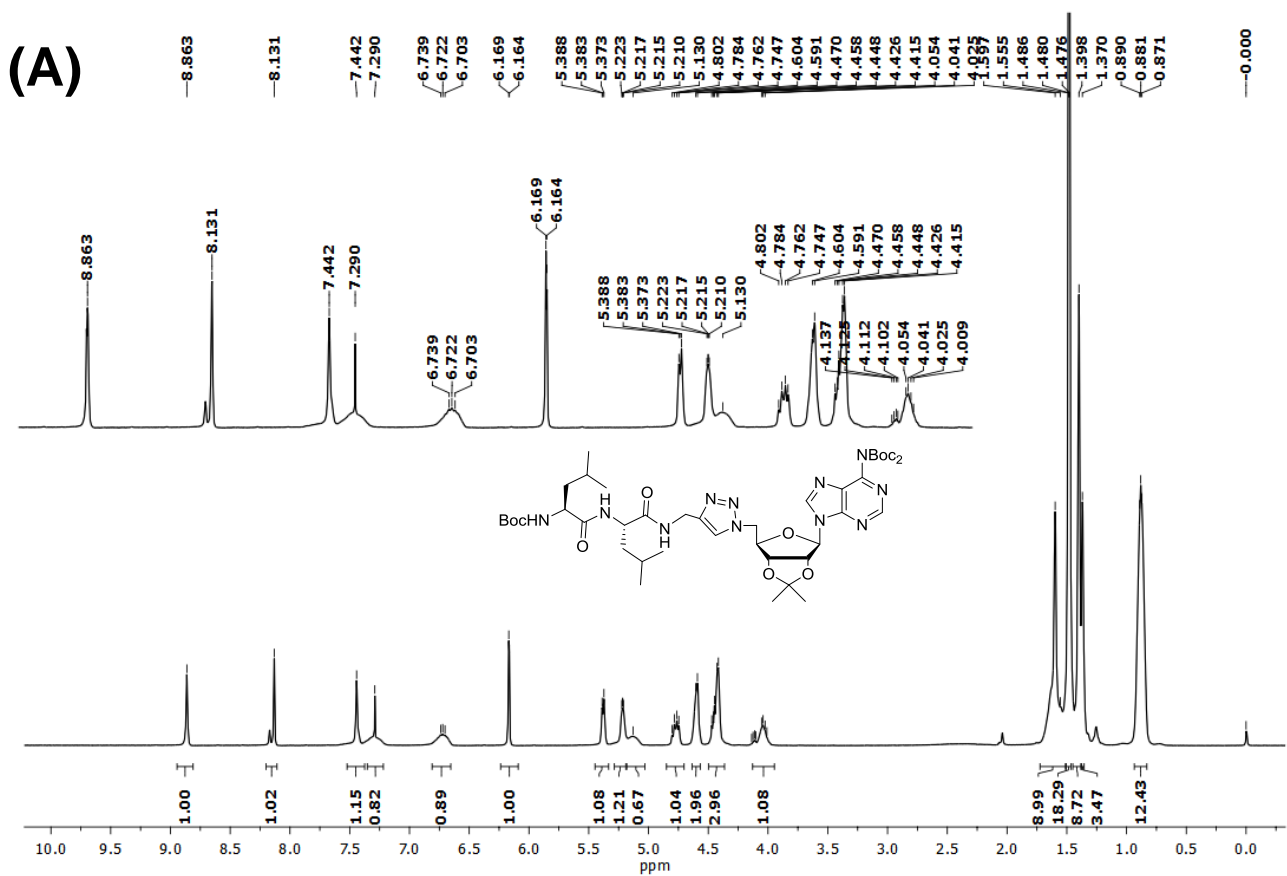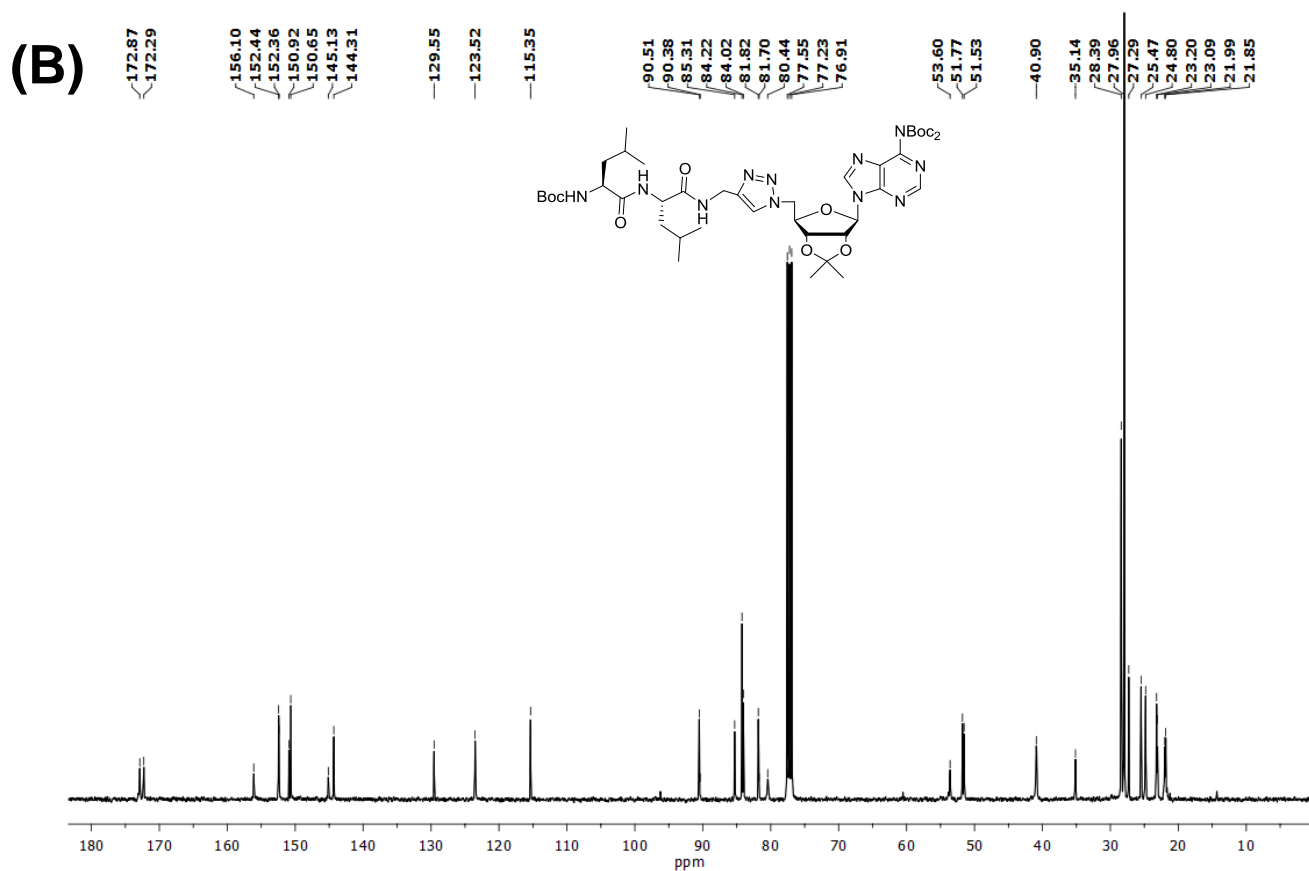

**Figure S10: (A) <sup>1</sup>H-NMR (B) <sup>13</sup>C-NMR spectra of peptide **10** (Boc-Leu-Leu-*tz*-A<sup>N(Boc)<sub>2</sub></sup>).**

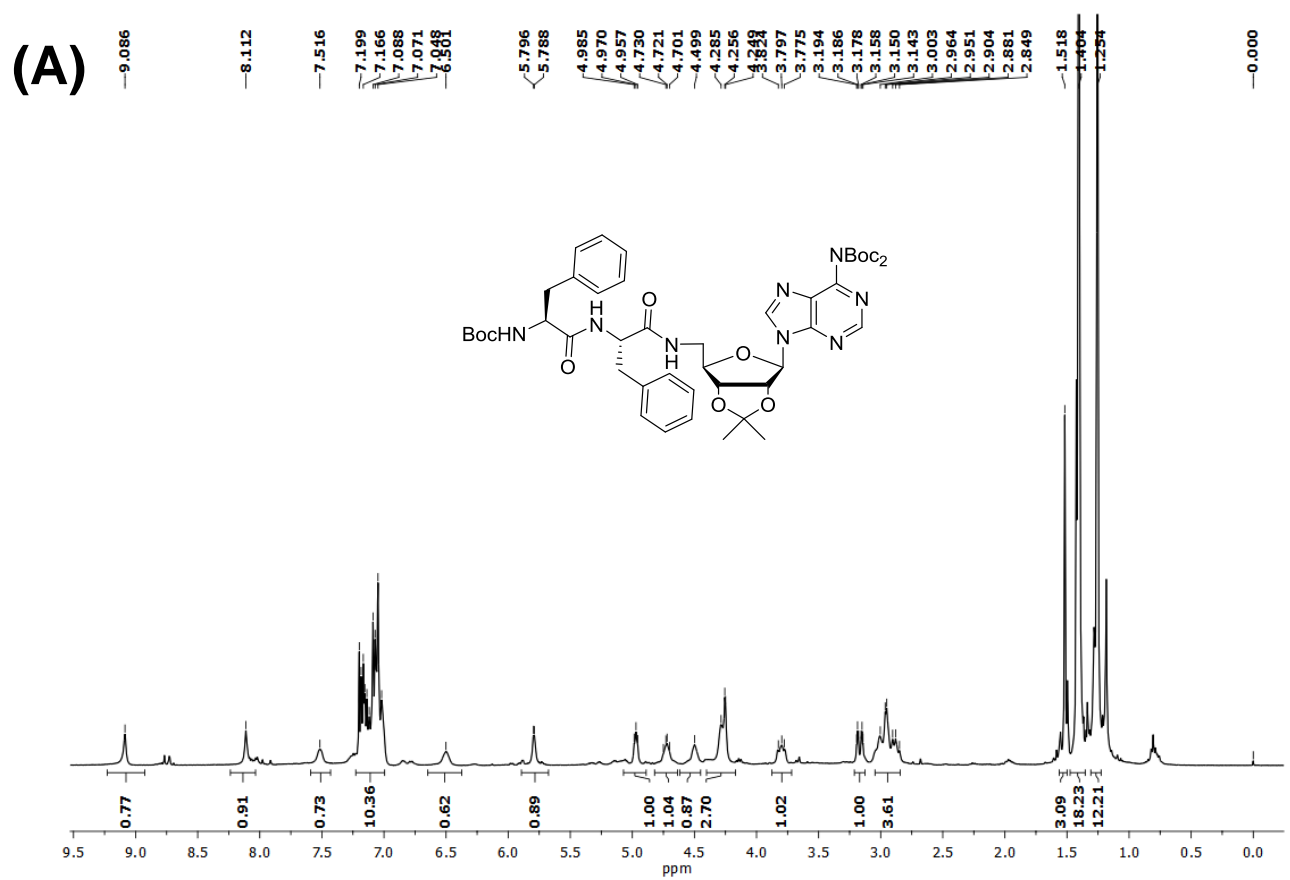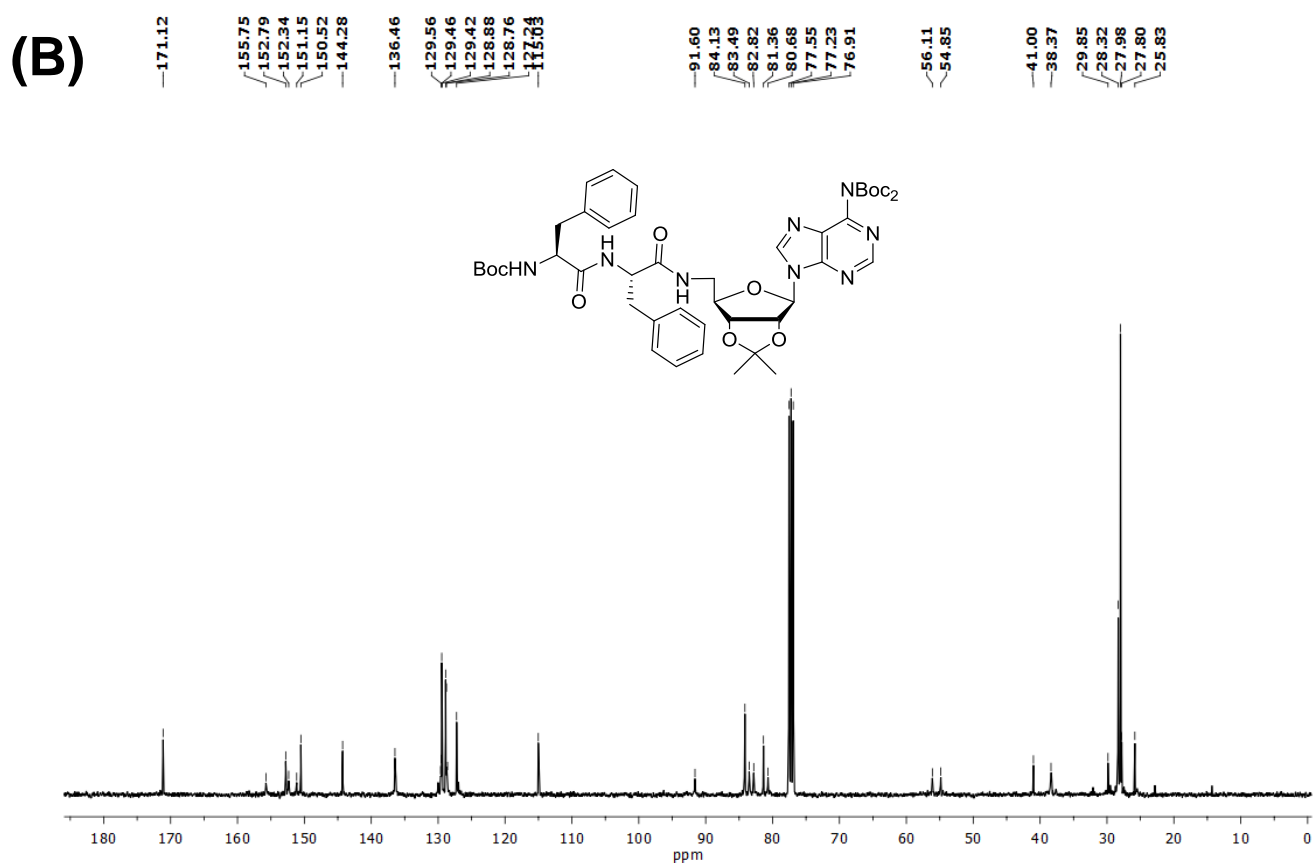

**Figure S11: (A) <sup>1</sup>H-NMR (B) <sup>13</sup>C-NMR spectra of peptide 12 (Boc-Phe-Phe-am-A<sup>N(Boc)<sub>2</sub></sup>).**

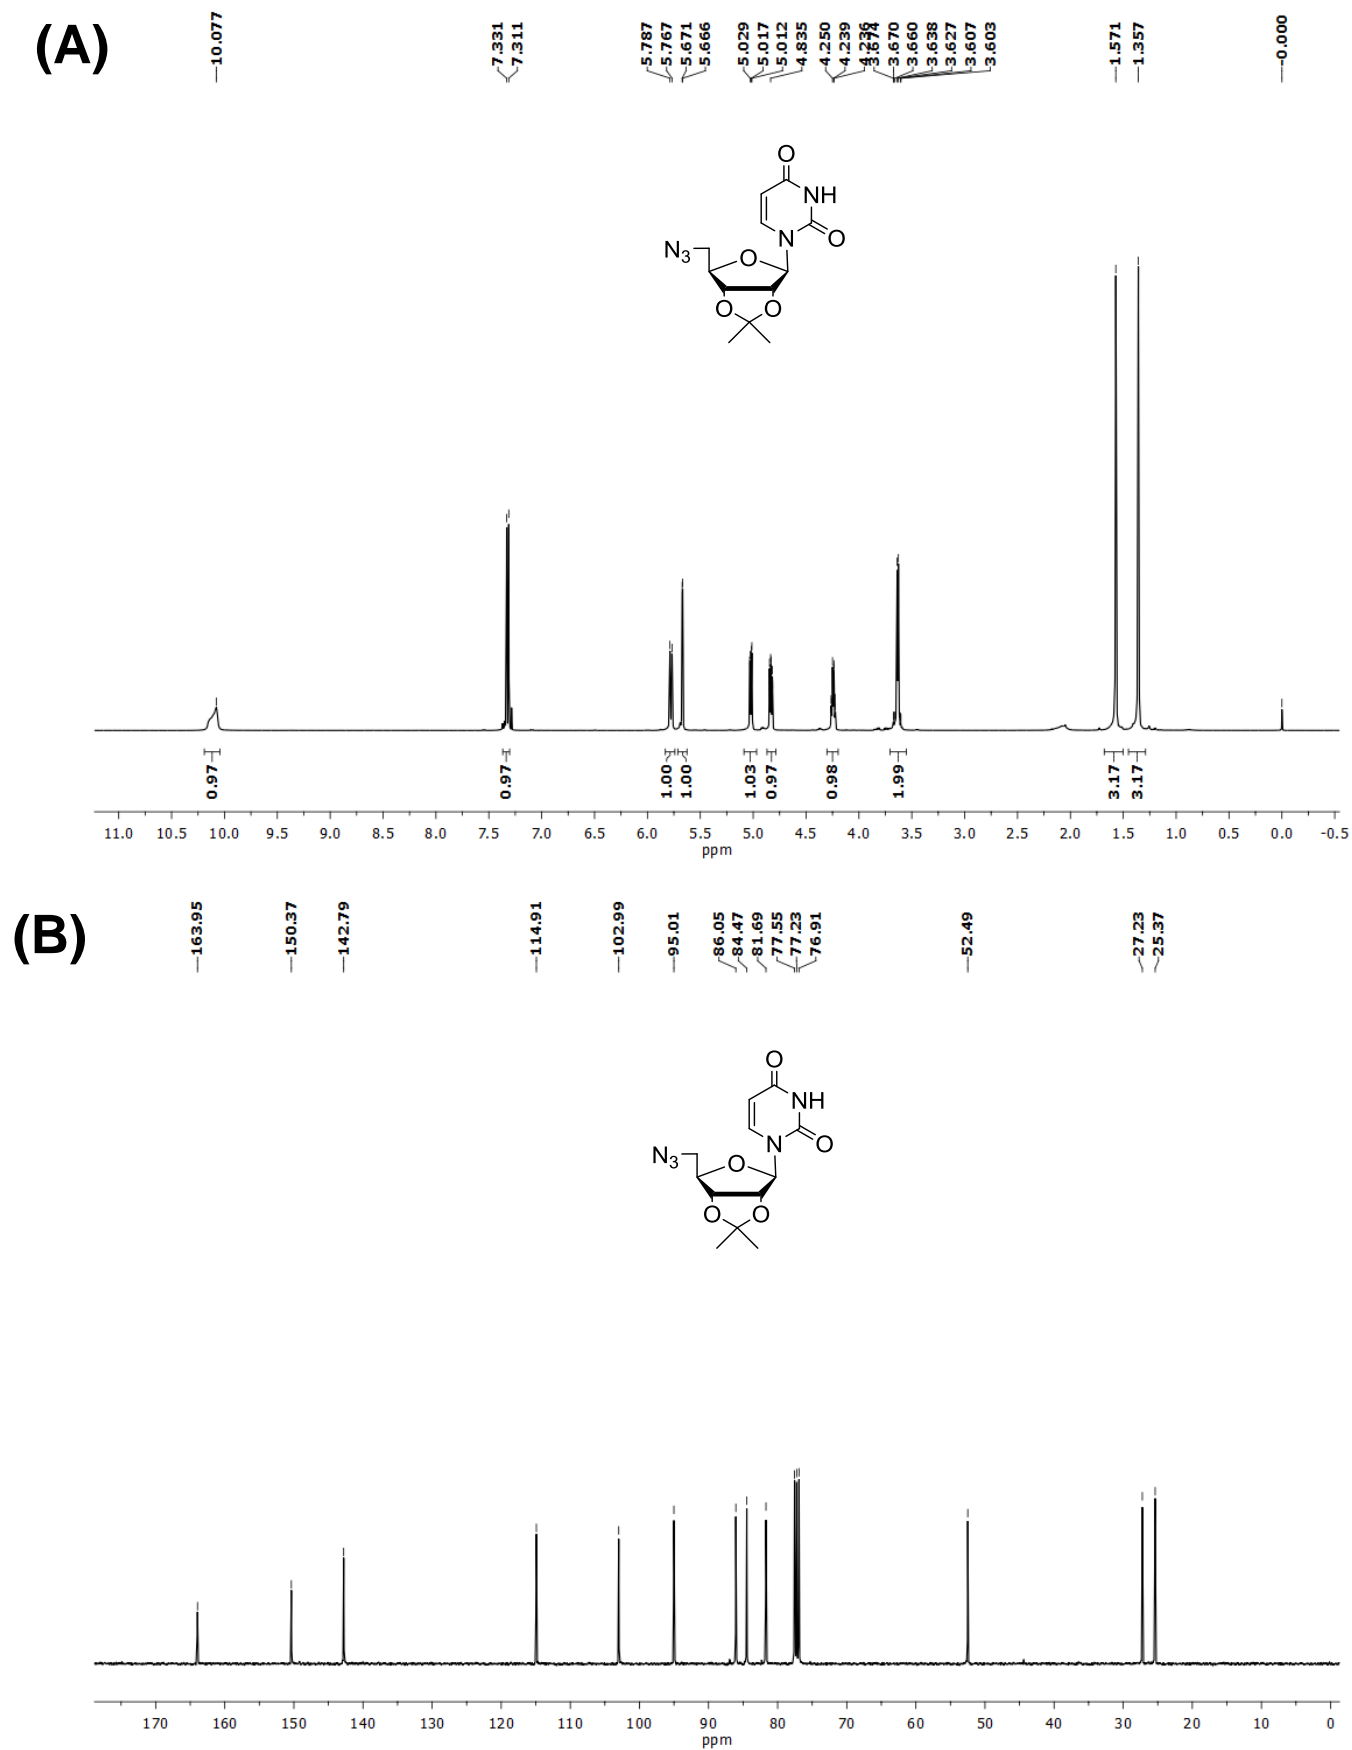

**Figure S12: (A)  $^1\text{H}$ -NMR (B)  $^{13}\text{C}$ -NMR spectra of azide **13**.**

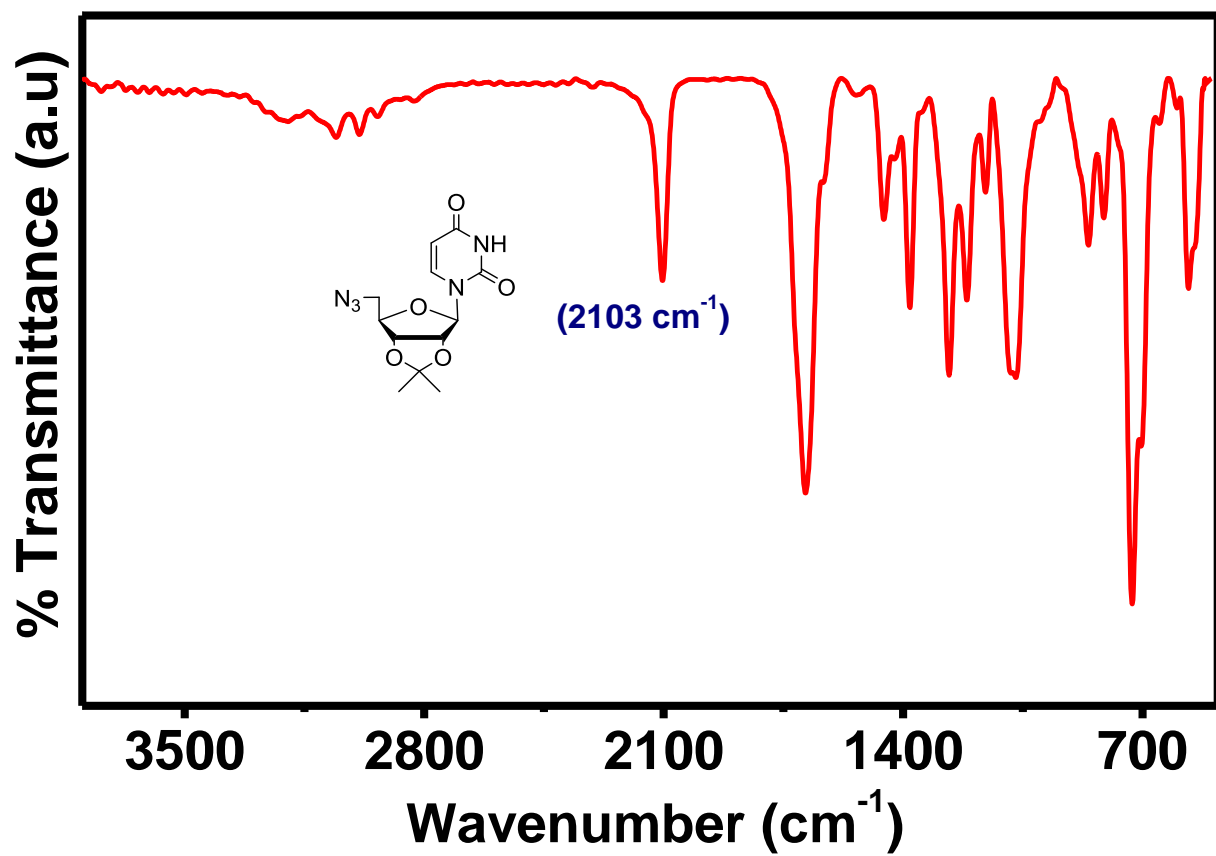

Figure S13: FTIR of azide 13.

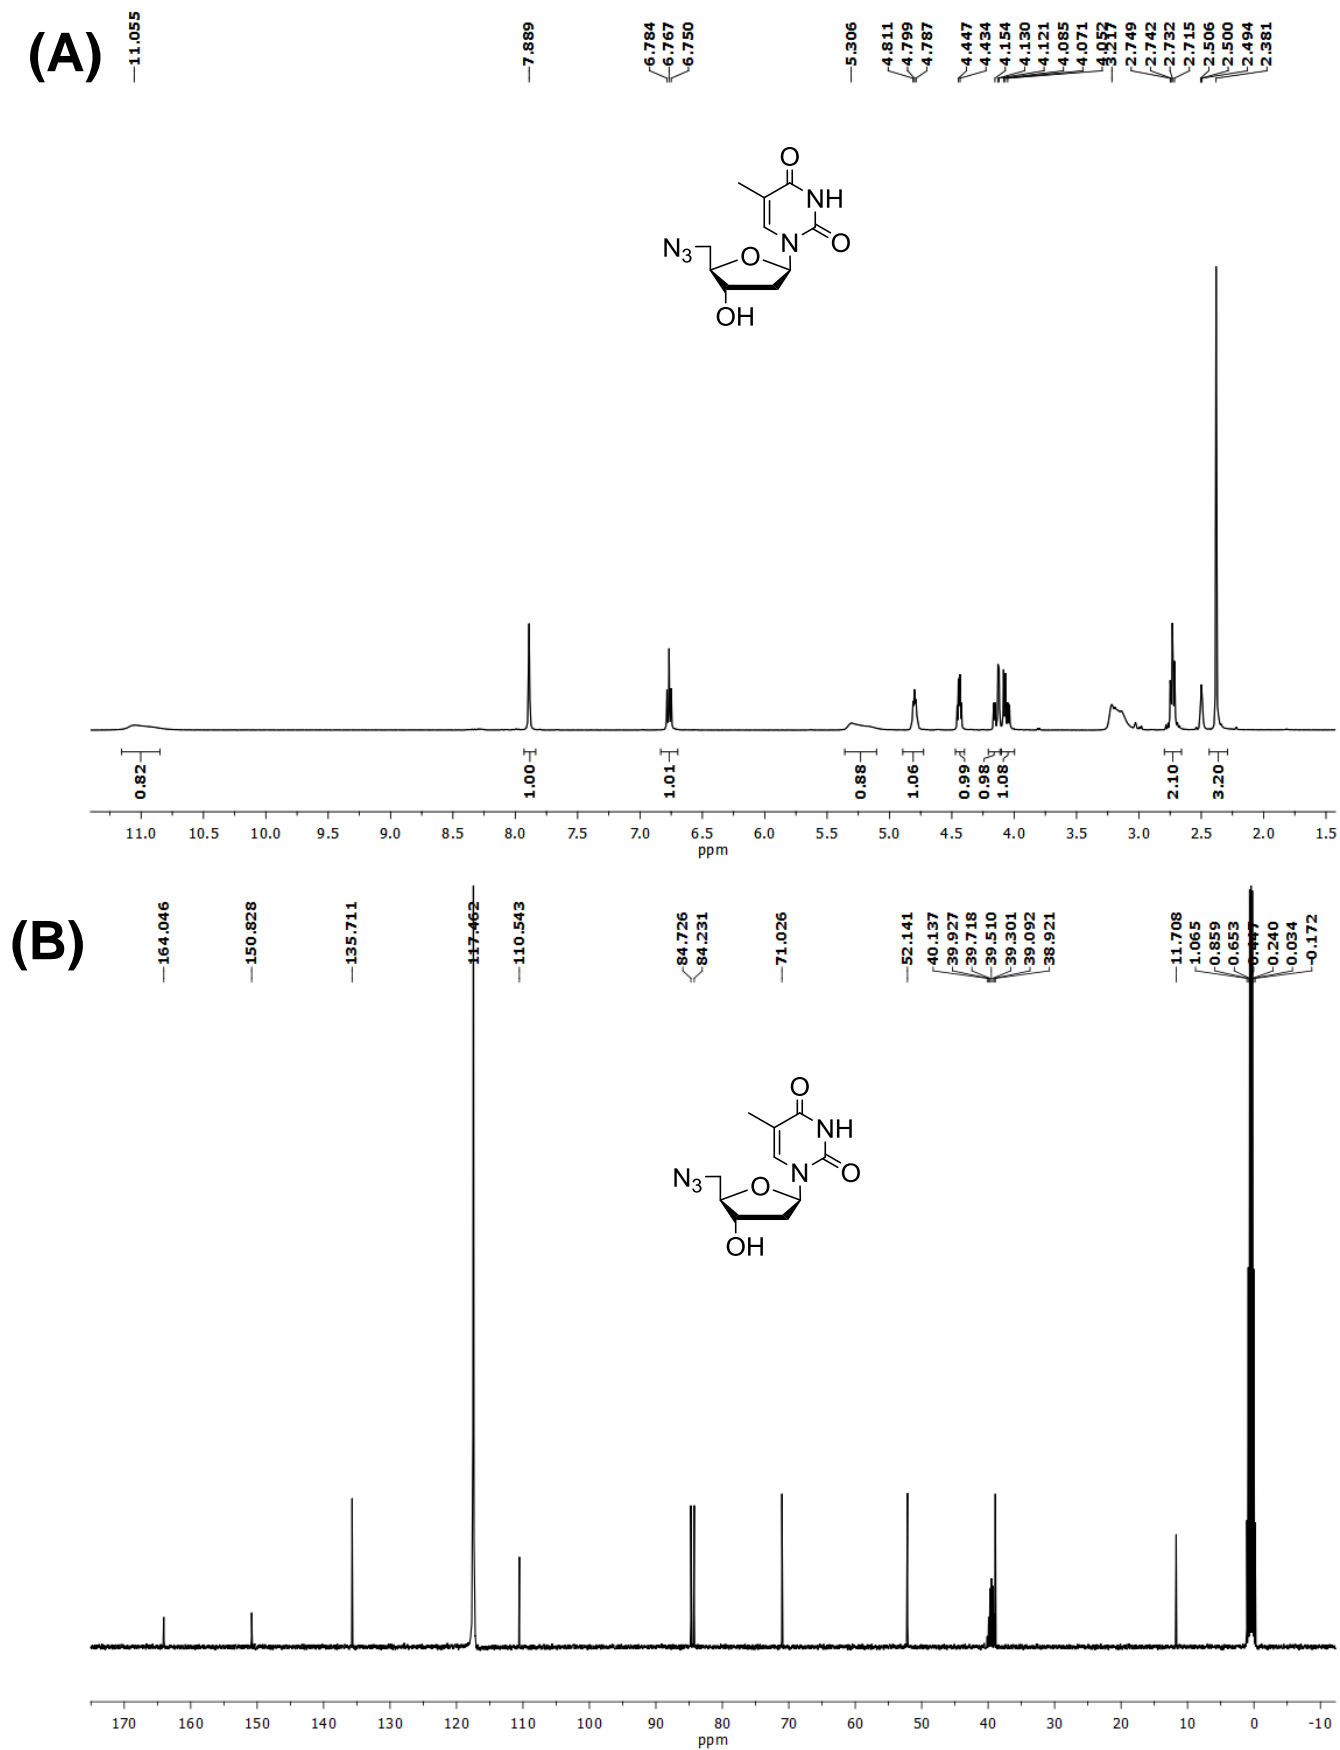

**Figure S14:** (A) <sup>1</sup>H-NMR (B) <sup>13</sup>C-NMR spectra of azide **14** [in ACN-d<sub>3</sub> + DMSO-d<sub>6</sub> (5:1)].

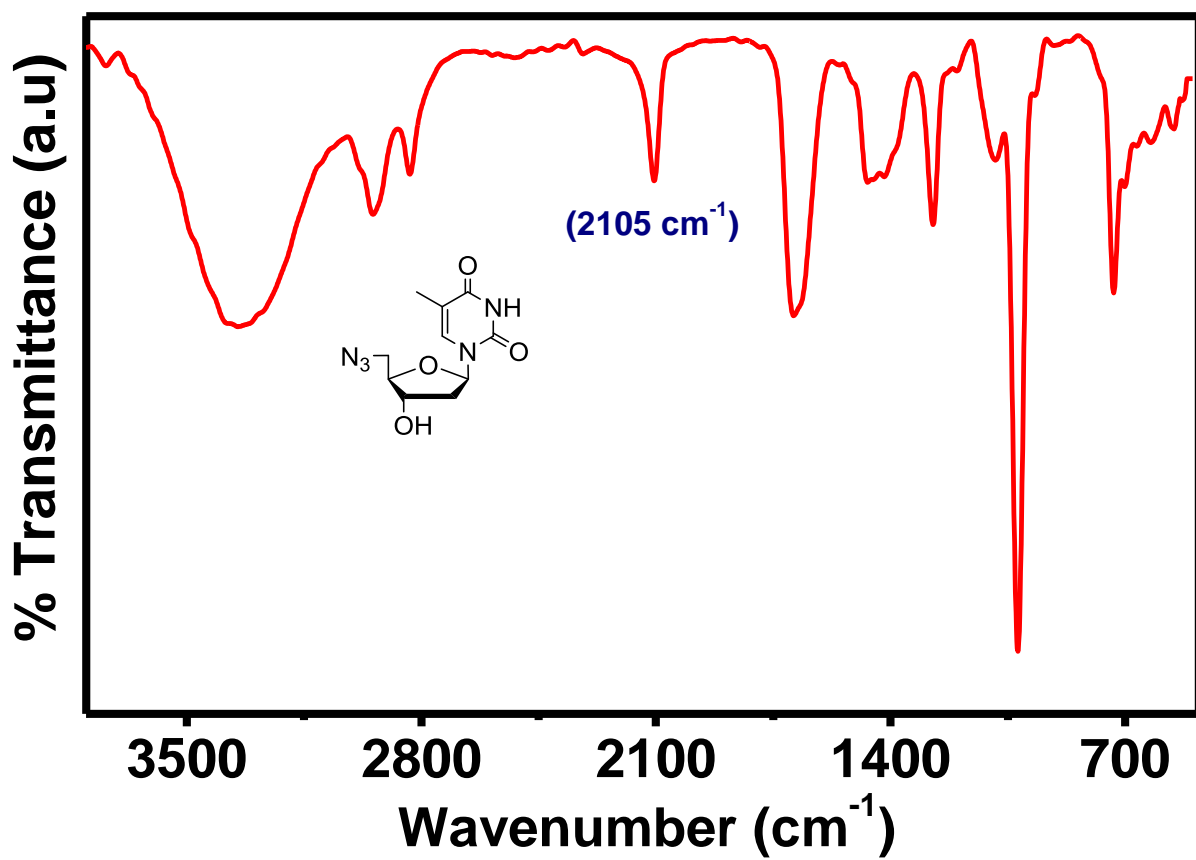

Figure S15: FTIR of azide 14

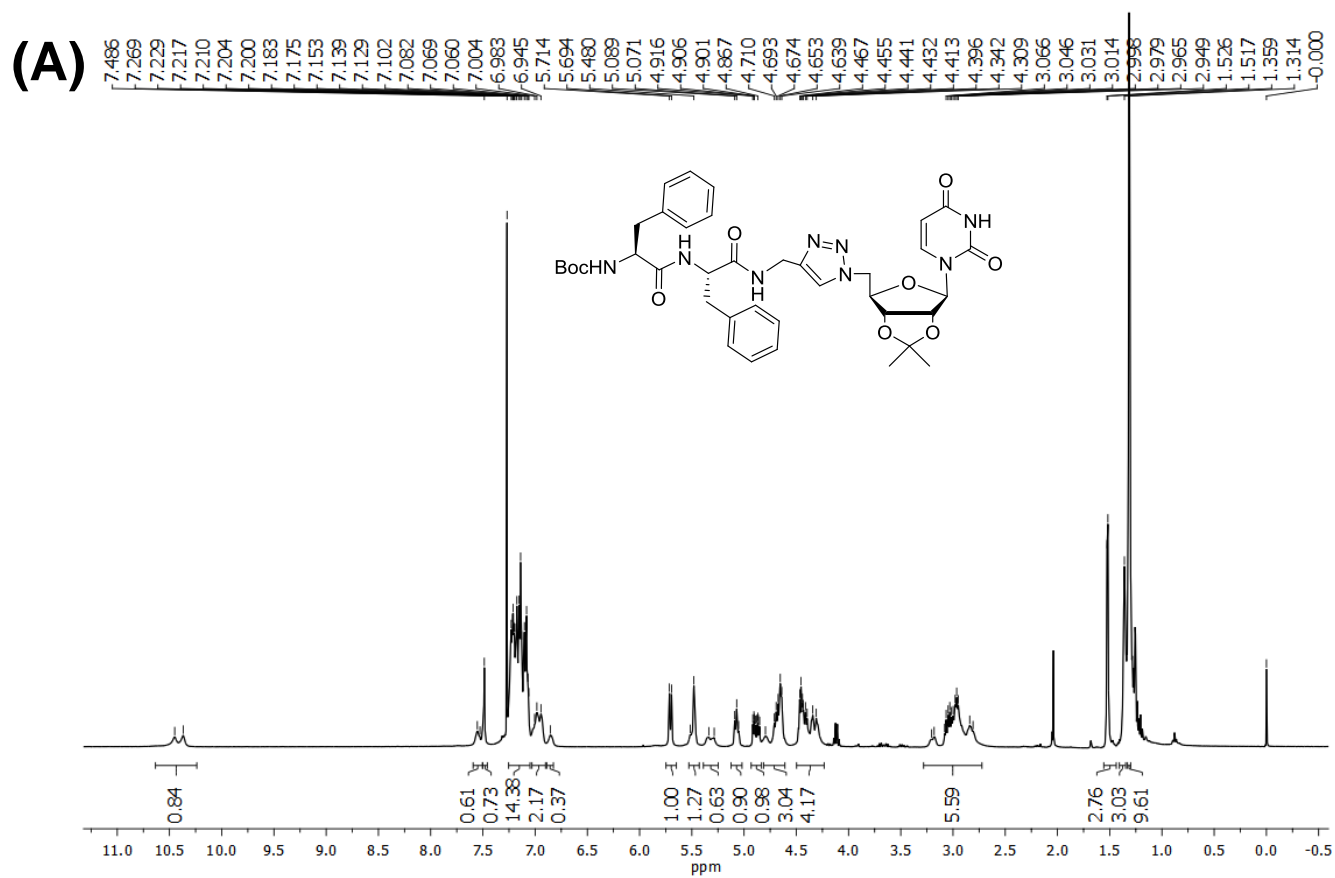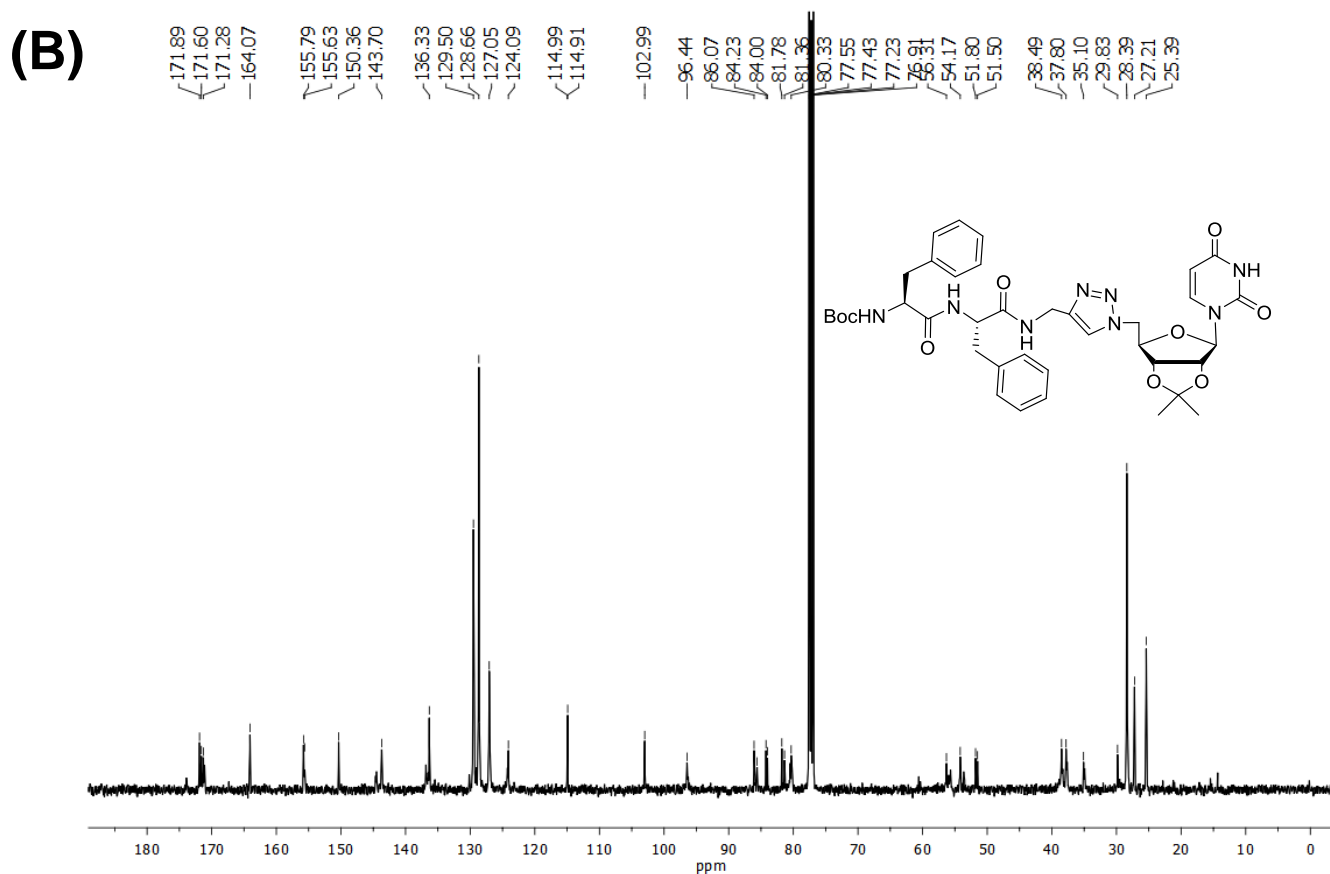

**Figure S16: (A)  $^1\text{H}$ -NMR (B)  $^{13}\text{C}$ -NMR spectra of peptide **15** (Boc-Phe-Phe-*tz*-U).**

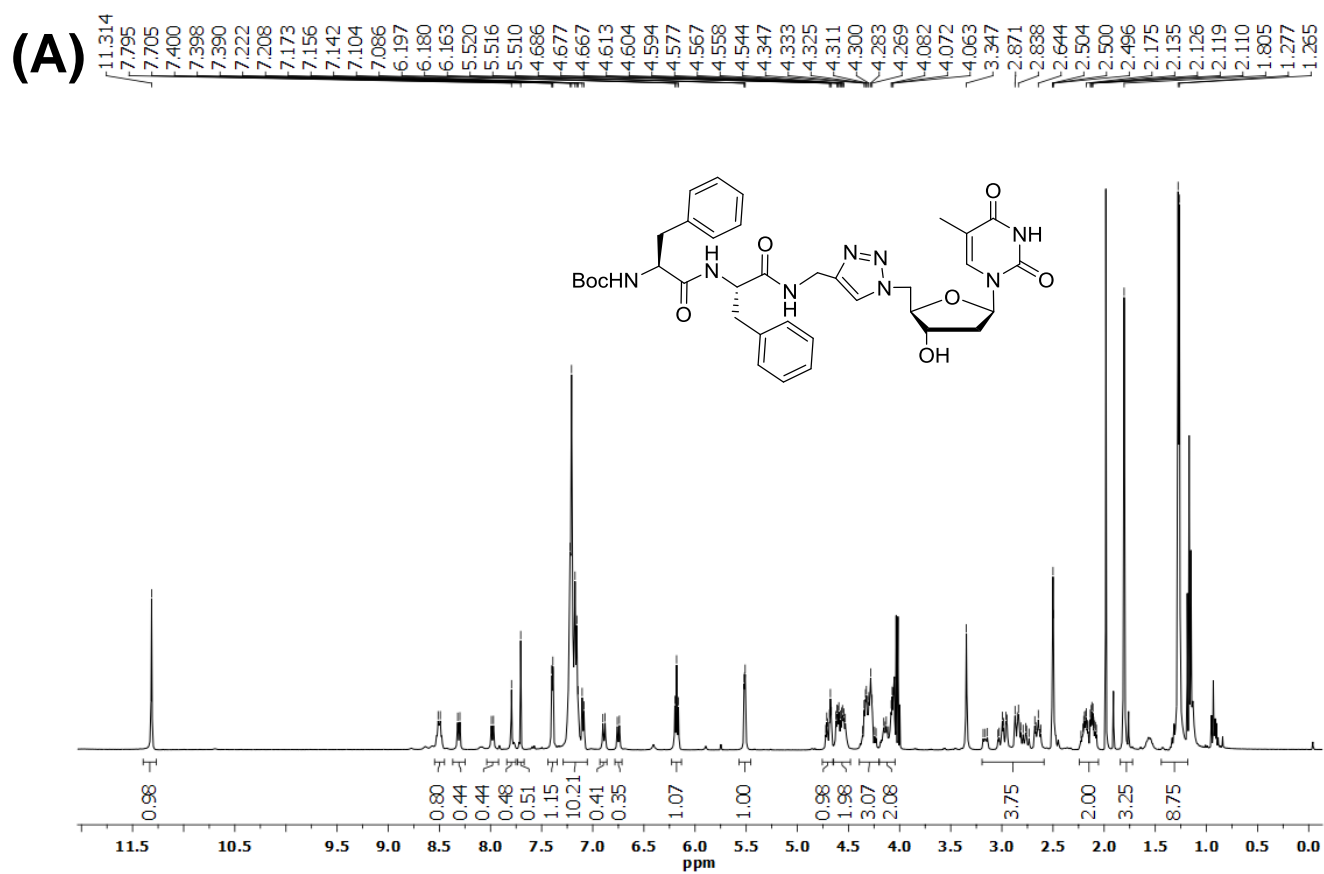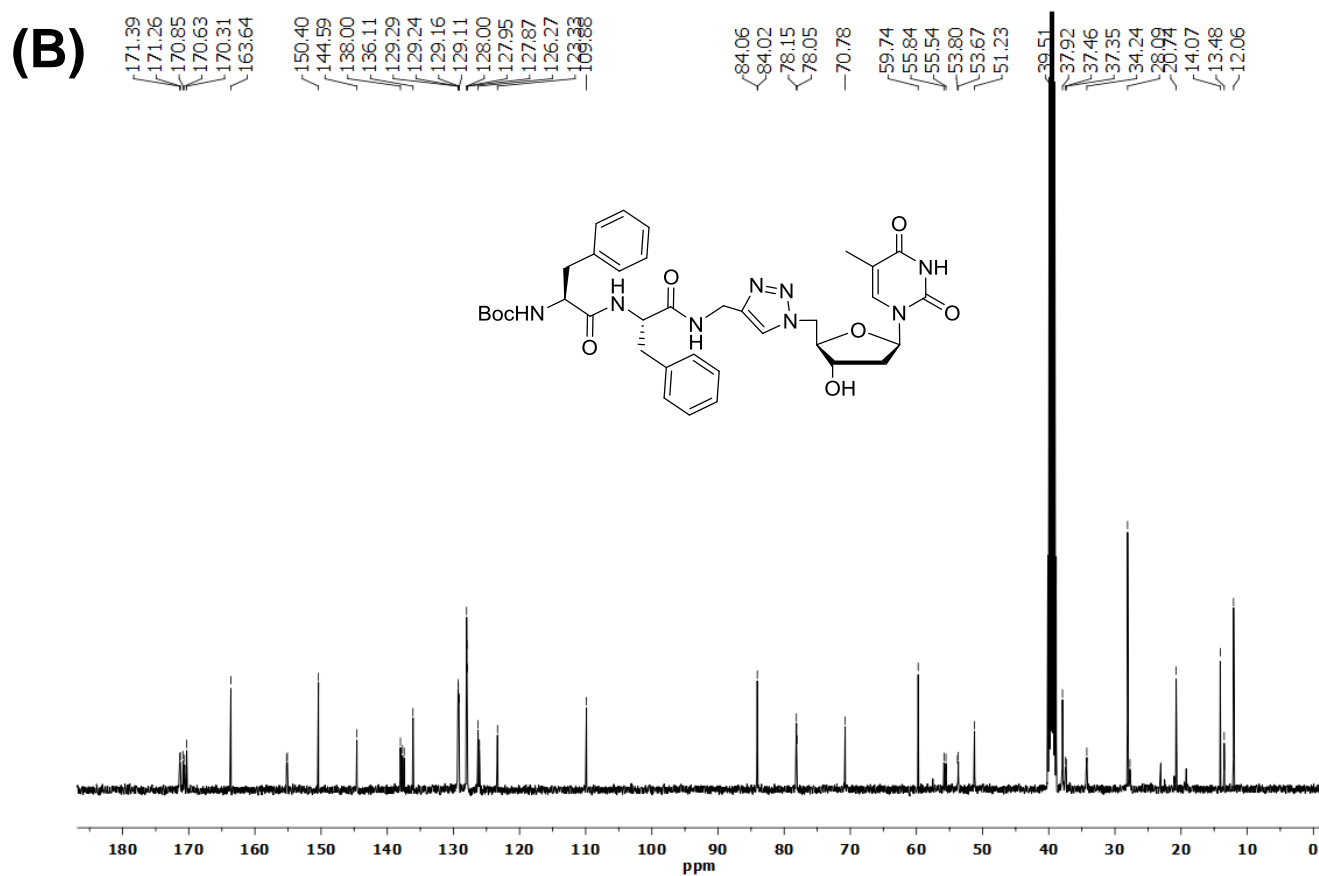

**Figure S17:** (A)  $^1\text{H}$ -NMR (B)  $^{13}\text{C}$ -NMR spectra of peptide **16** (Boc-Phe-Phe-tz-T).

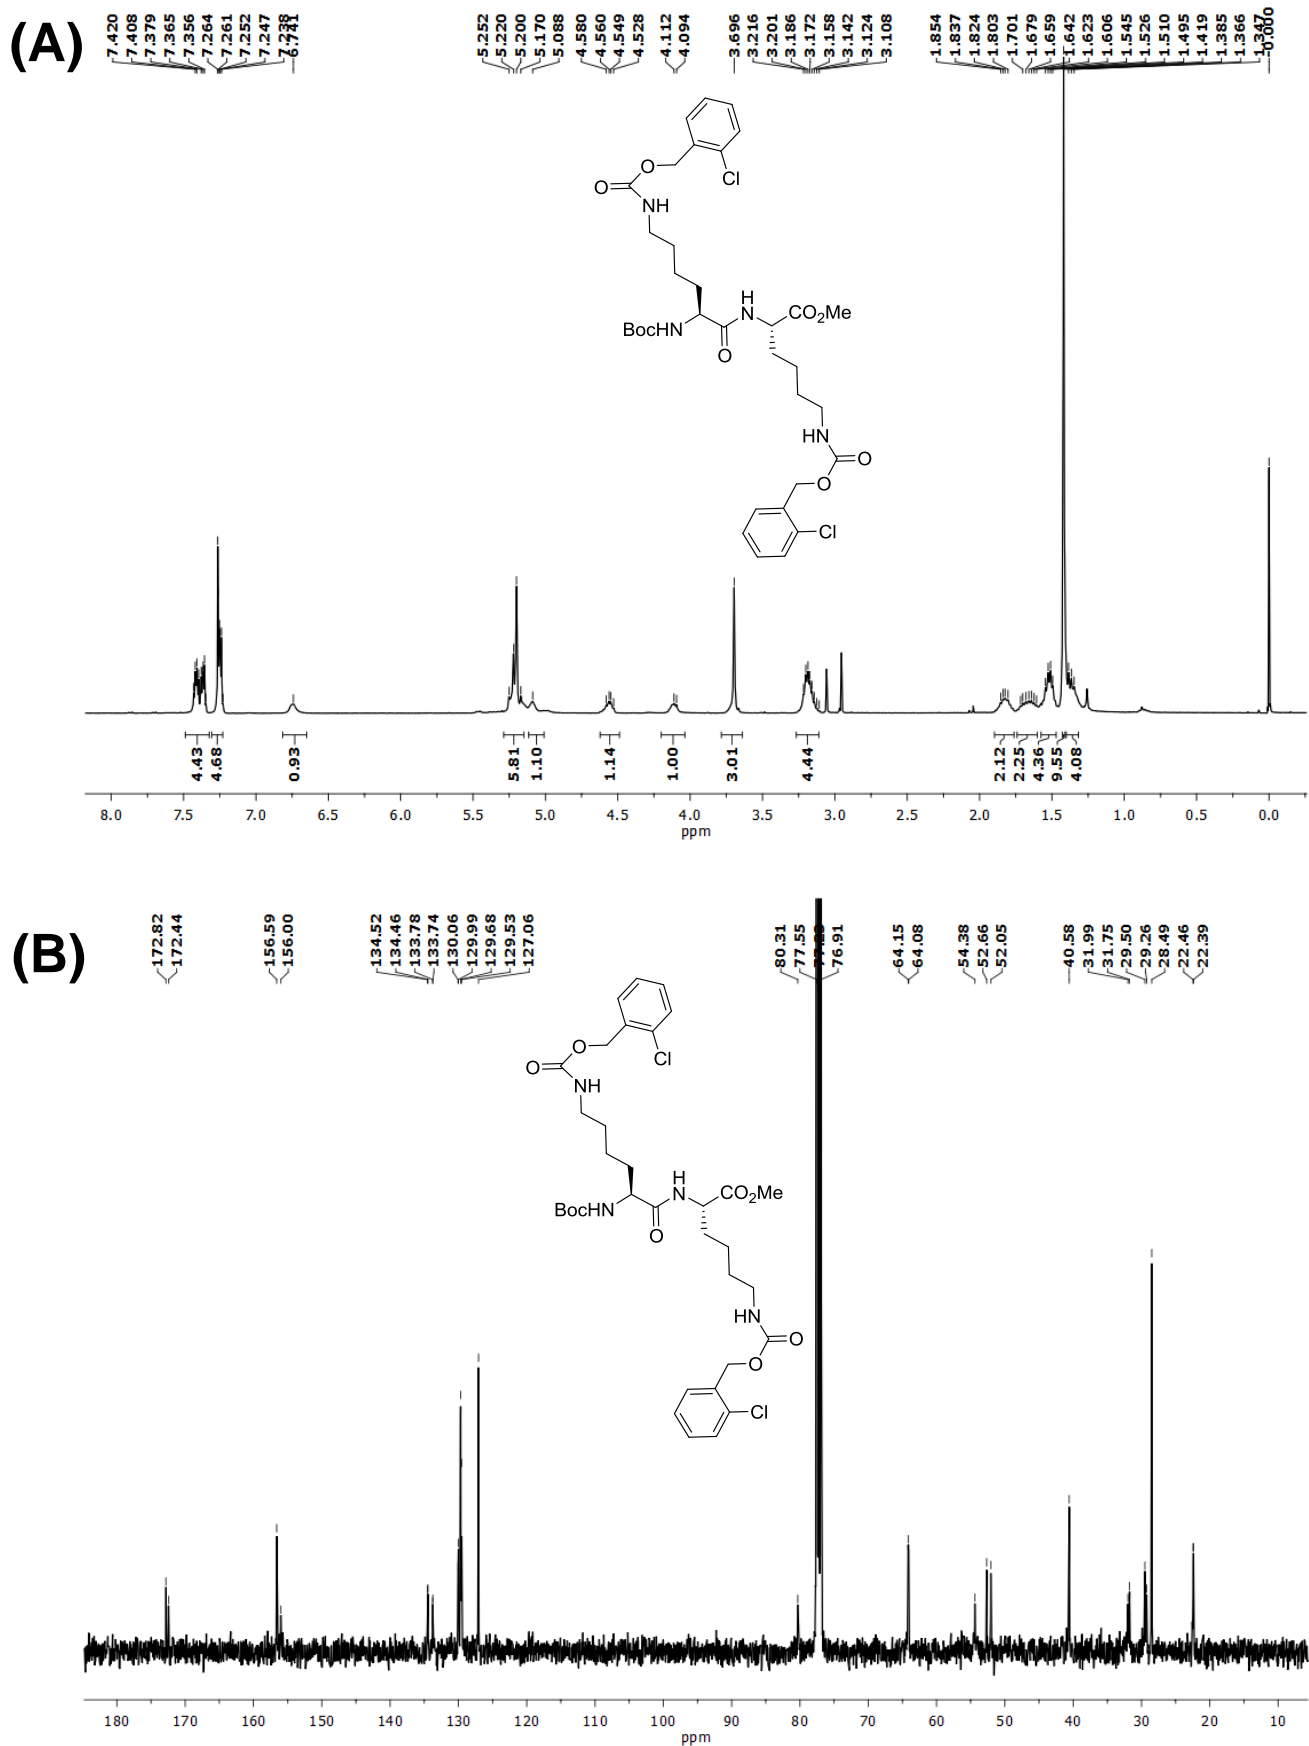

**Figure S18:** (A) <sup>1</sup>H-NMR and (B) <sup>13</sup>C-NMR spectra of Boc-Lys(Cl-Cbz)-Lys(Cl-Cbz)-OMe (S3).

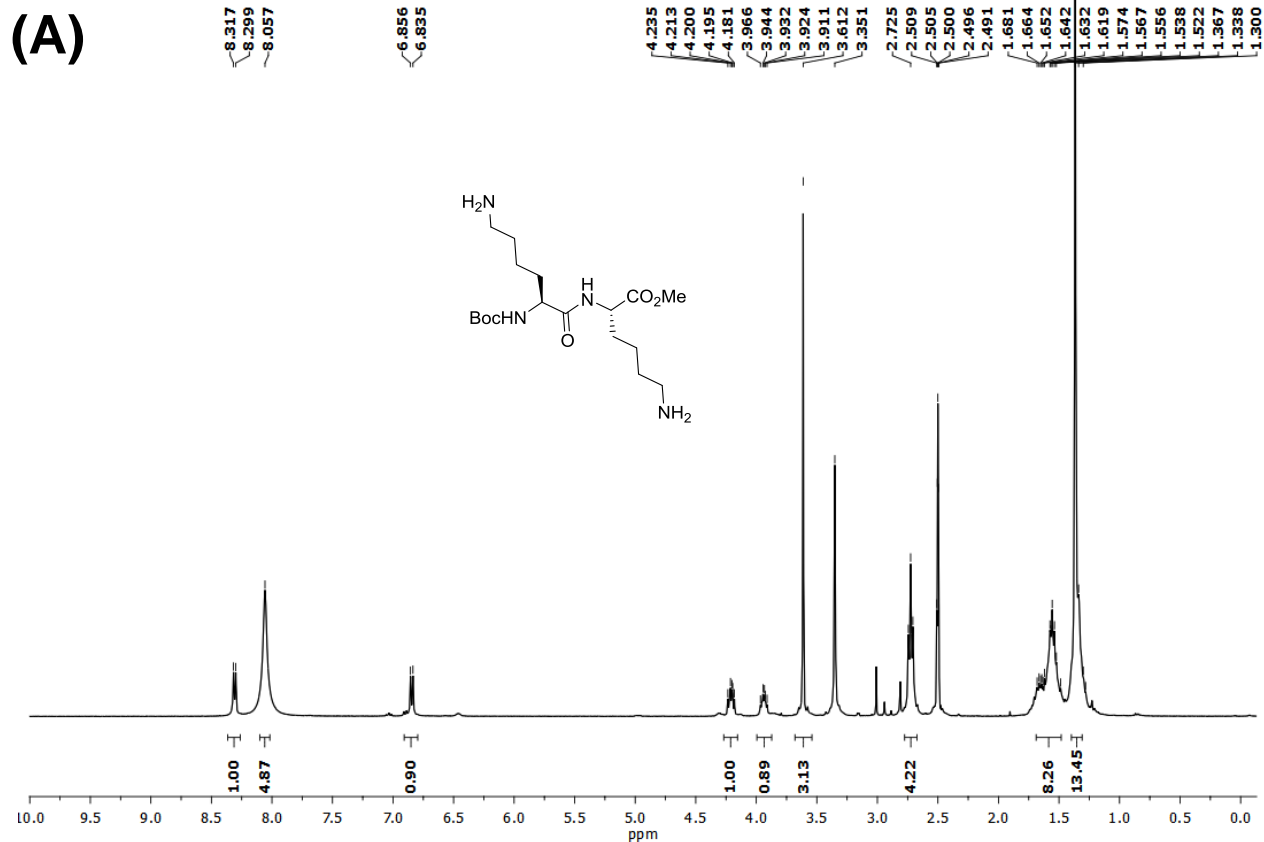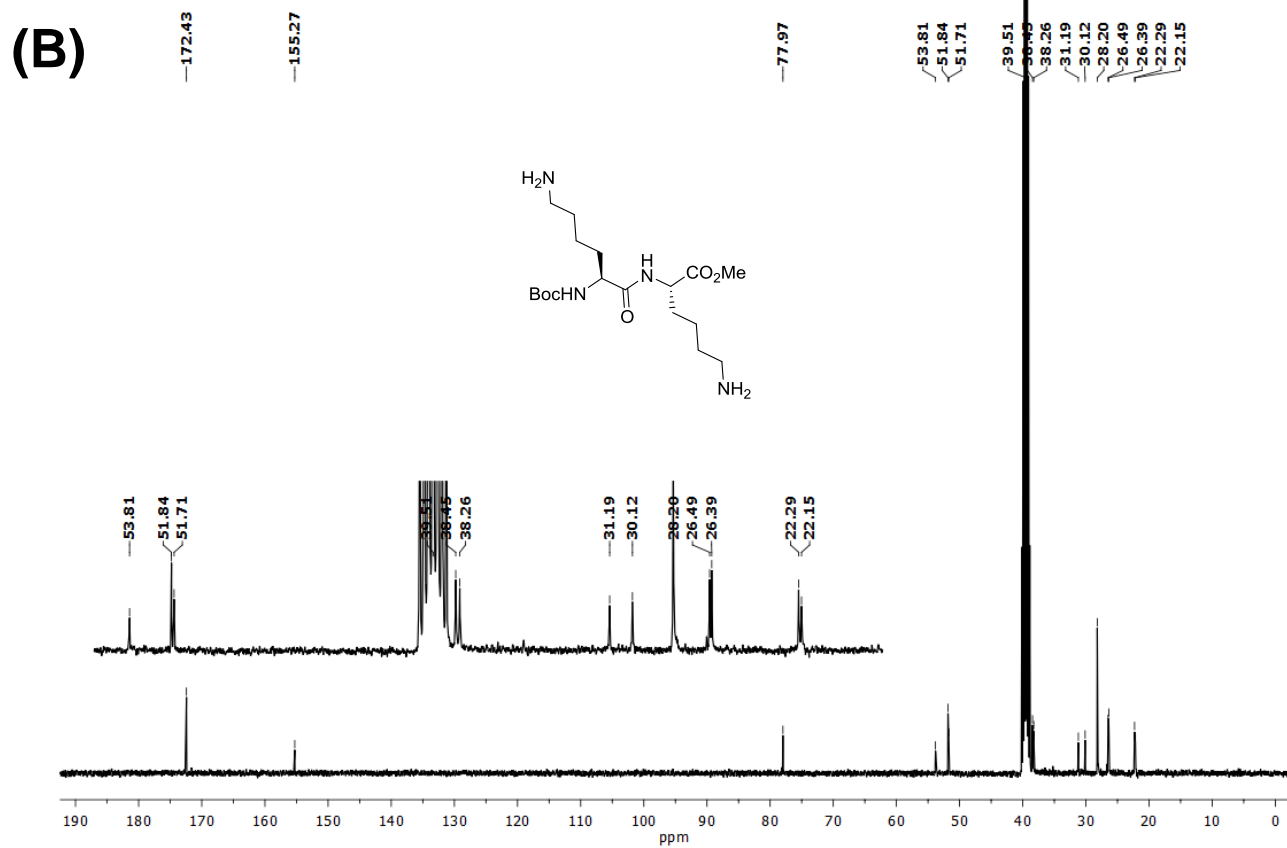

**Figure S19: (A) <sup>1</sup>H-NMR and (B) <sup>13</sup>C-NMR spectra of Boc-Lys-Lys-OMe (S4).**

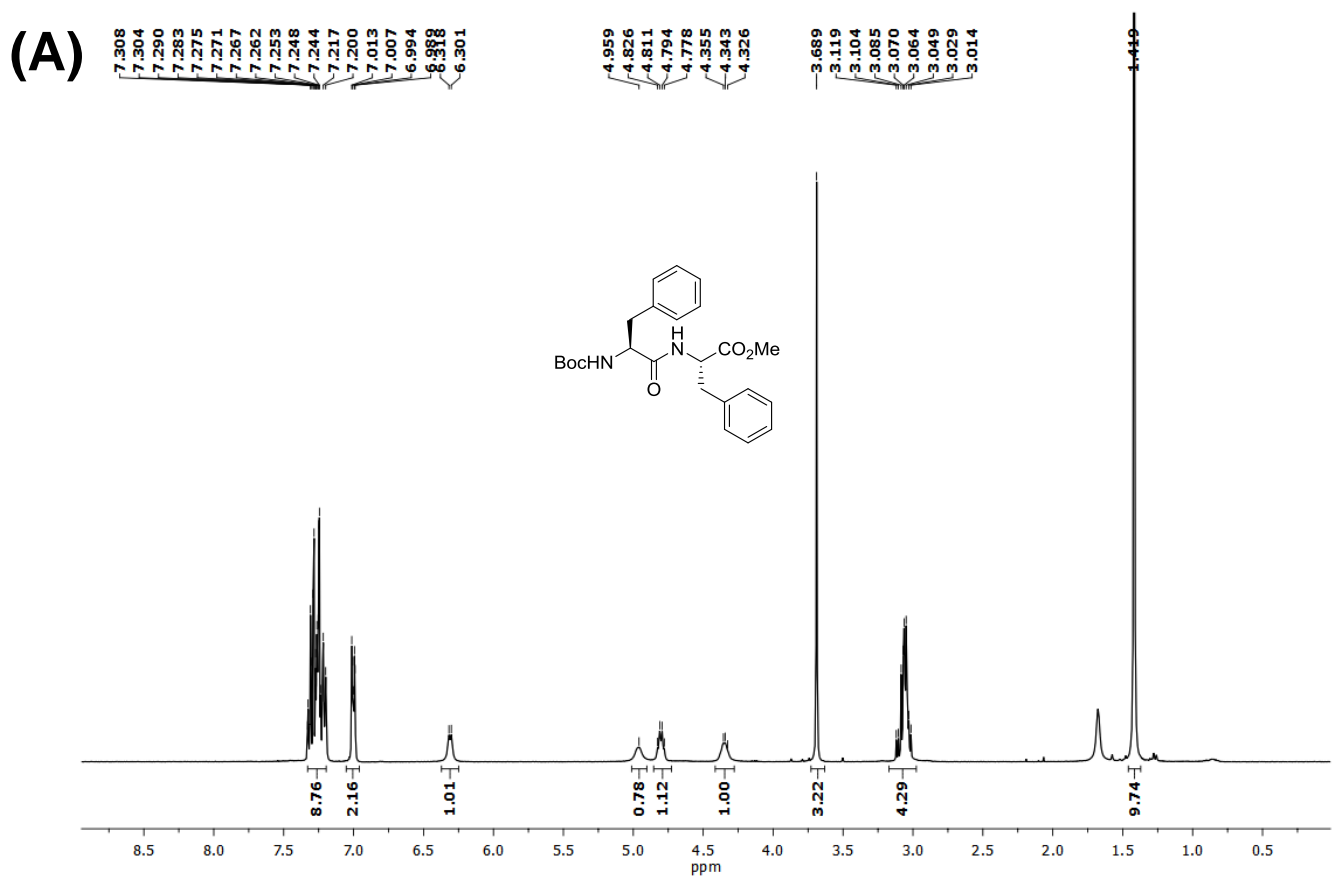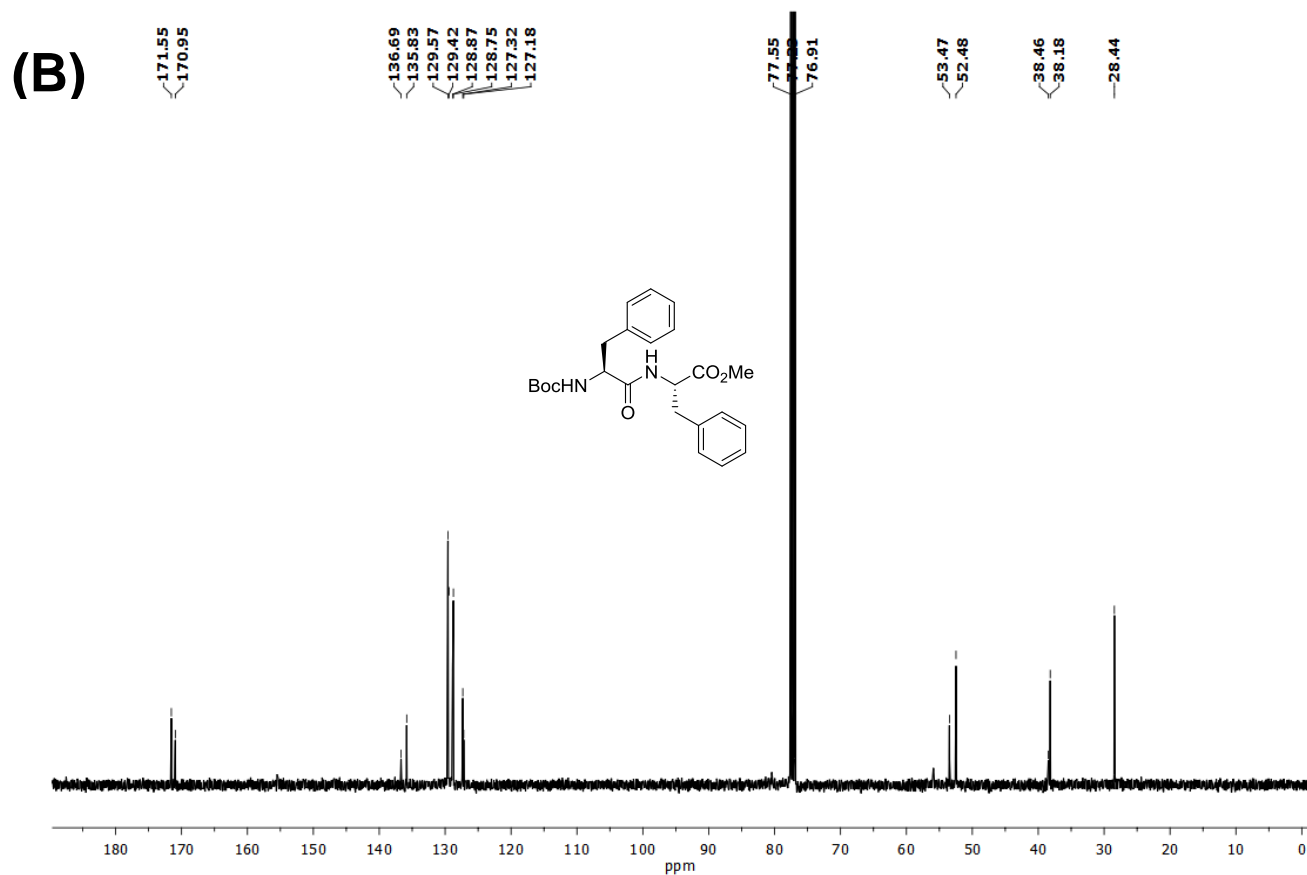

**Figure S20: (A) <sup>1</sup>H-NMR and (B) <sup>13</sup>C-NMR spectra of Boc-Phe-Phe-OMe.**

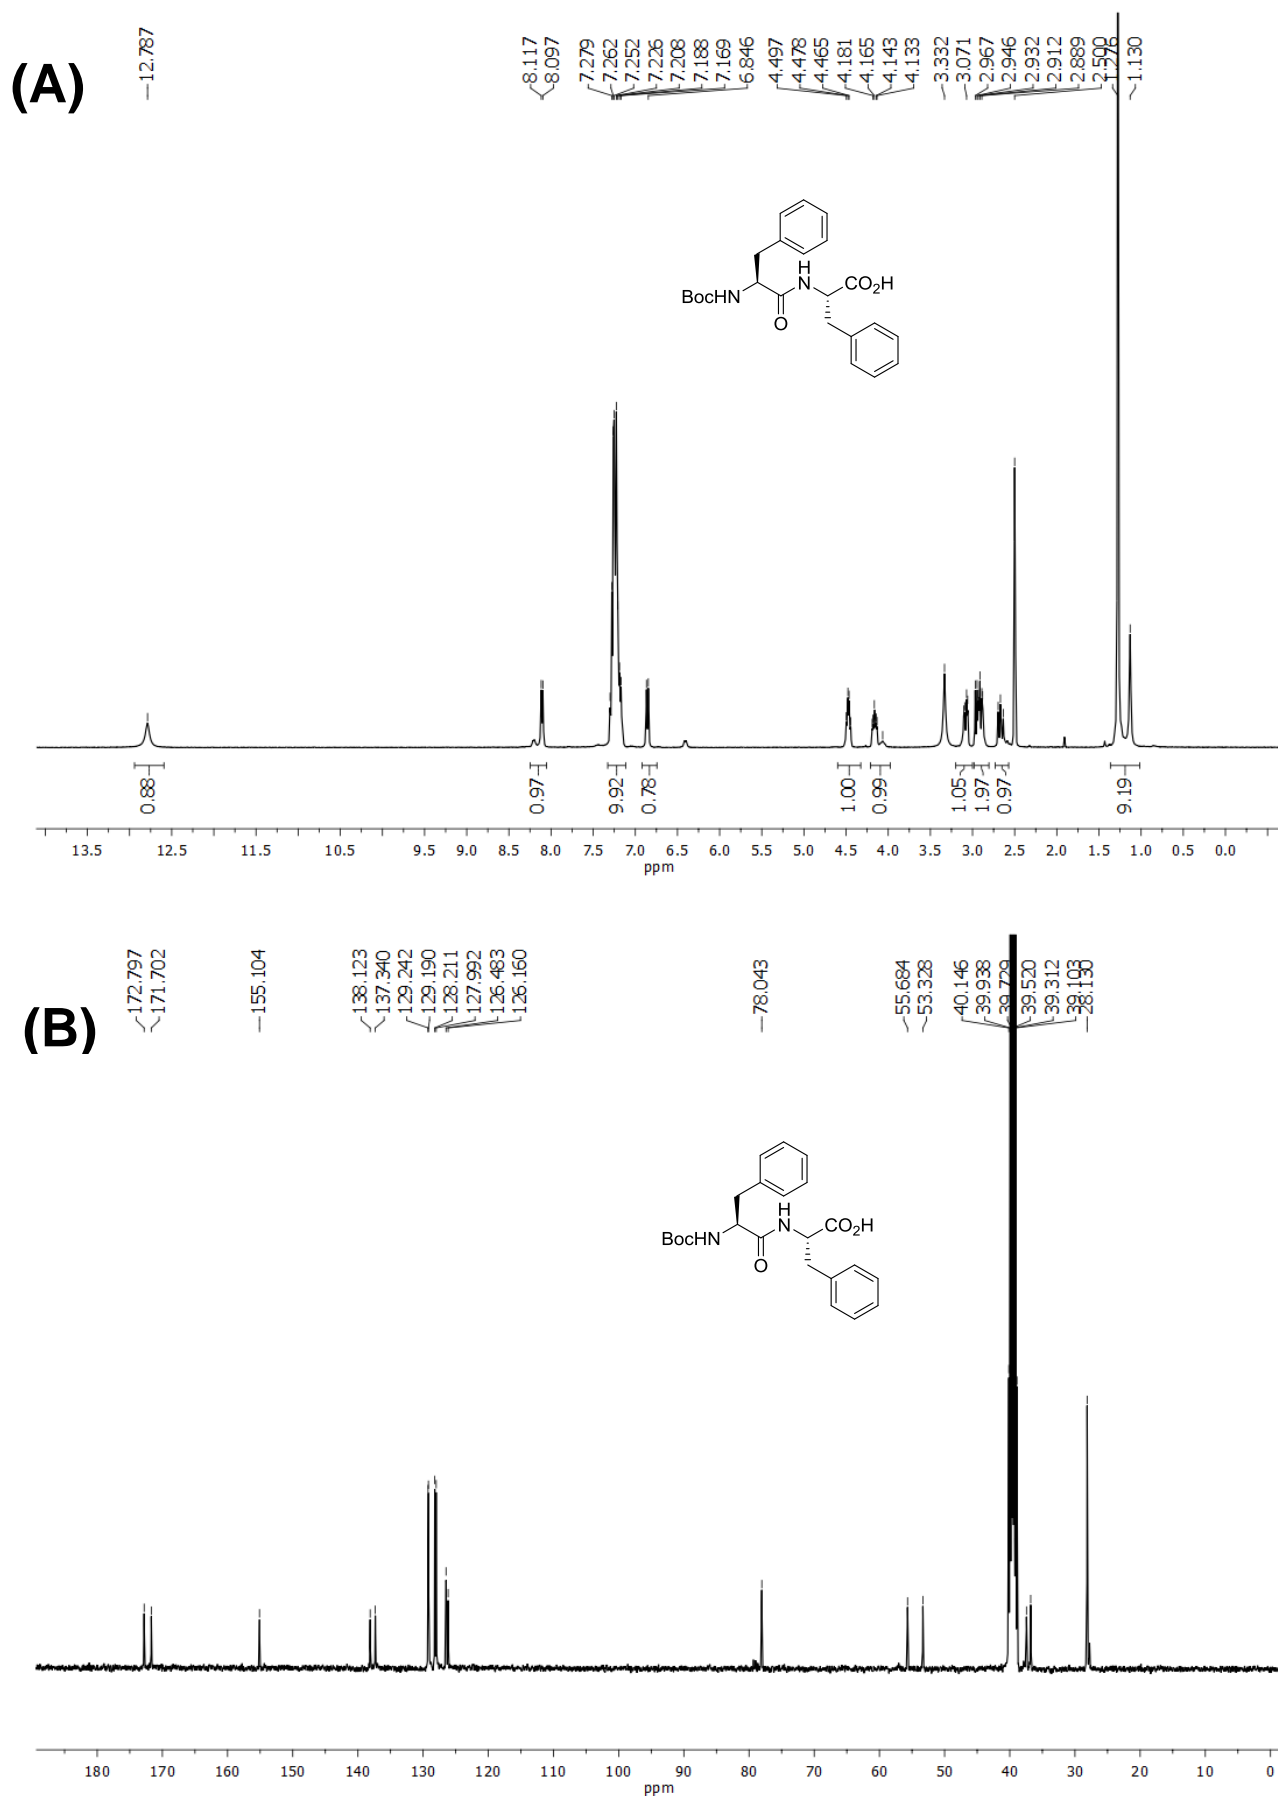

**Figure S21: (A) <sup>1</sup>H-NMR and (B) <sup>13</sup>C-NMR spectra of Boc-Phe-Phe-OH (1).**

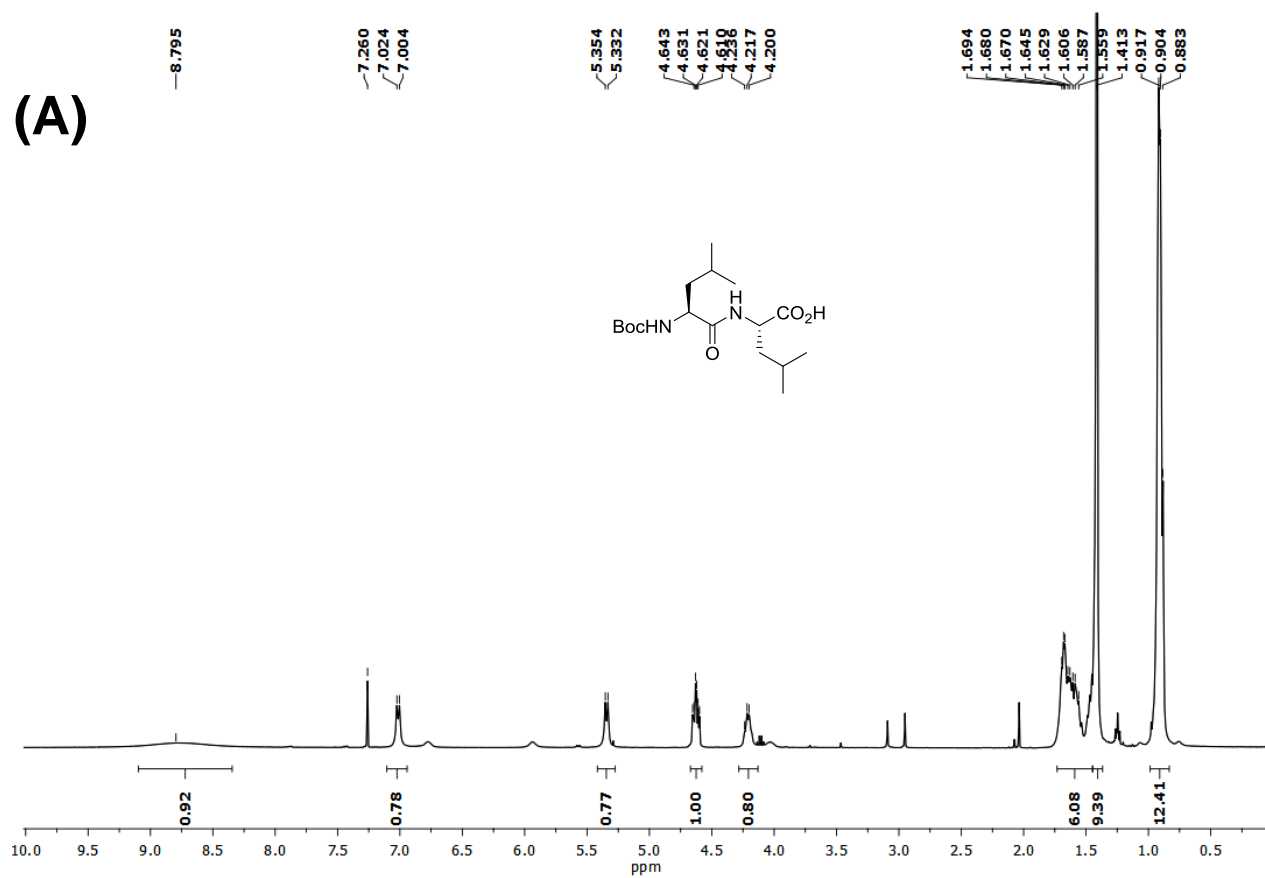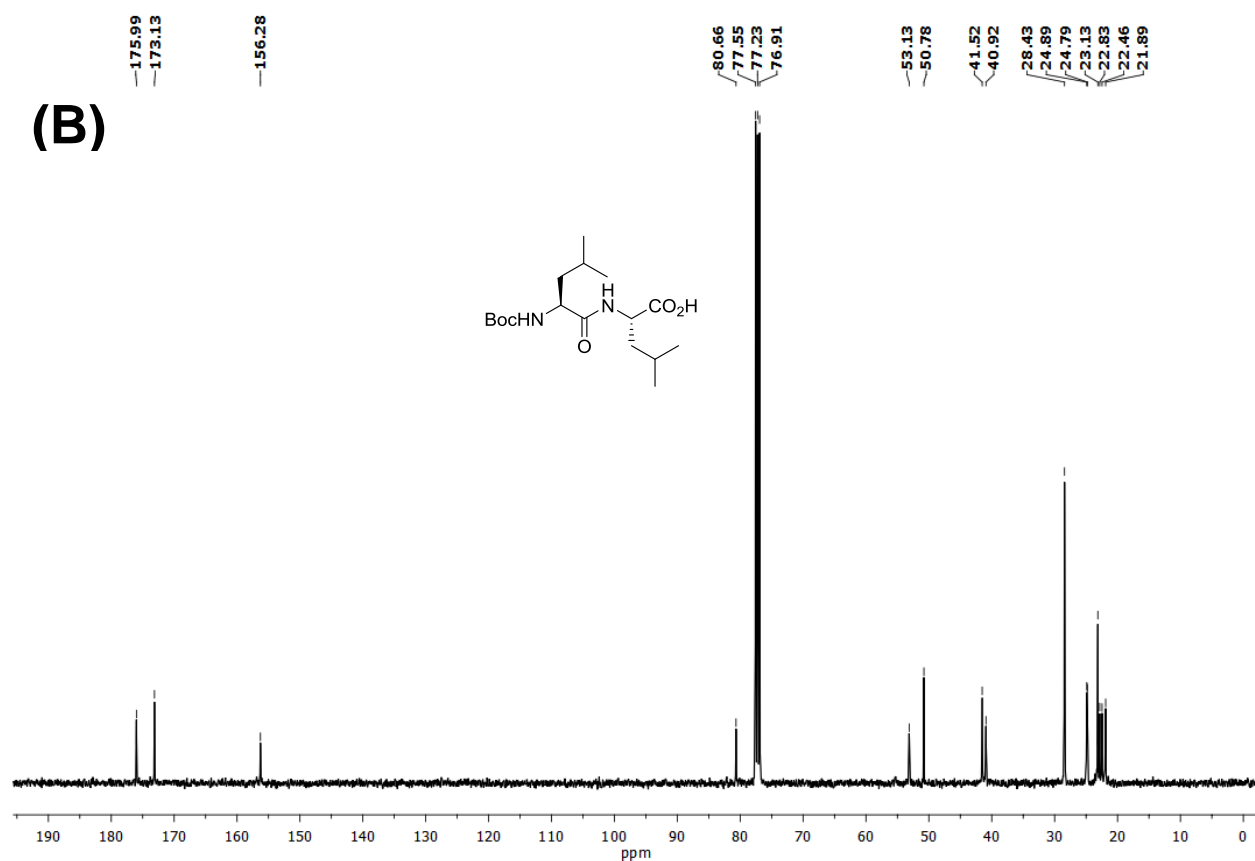

**Figure S22: (A) <sup>1</sup>H-NMR and (B) <sup>13</sup>C-NMR spectra of Boc-Leu- Leu-OH (2).**

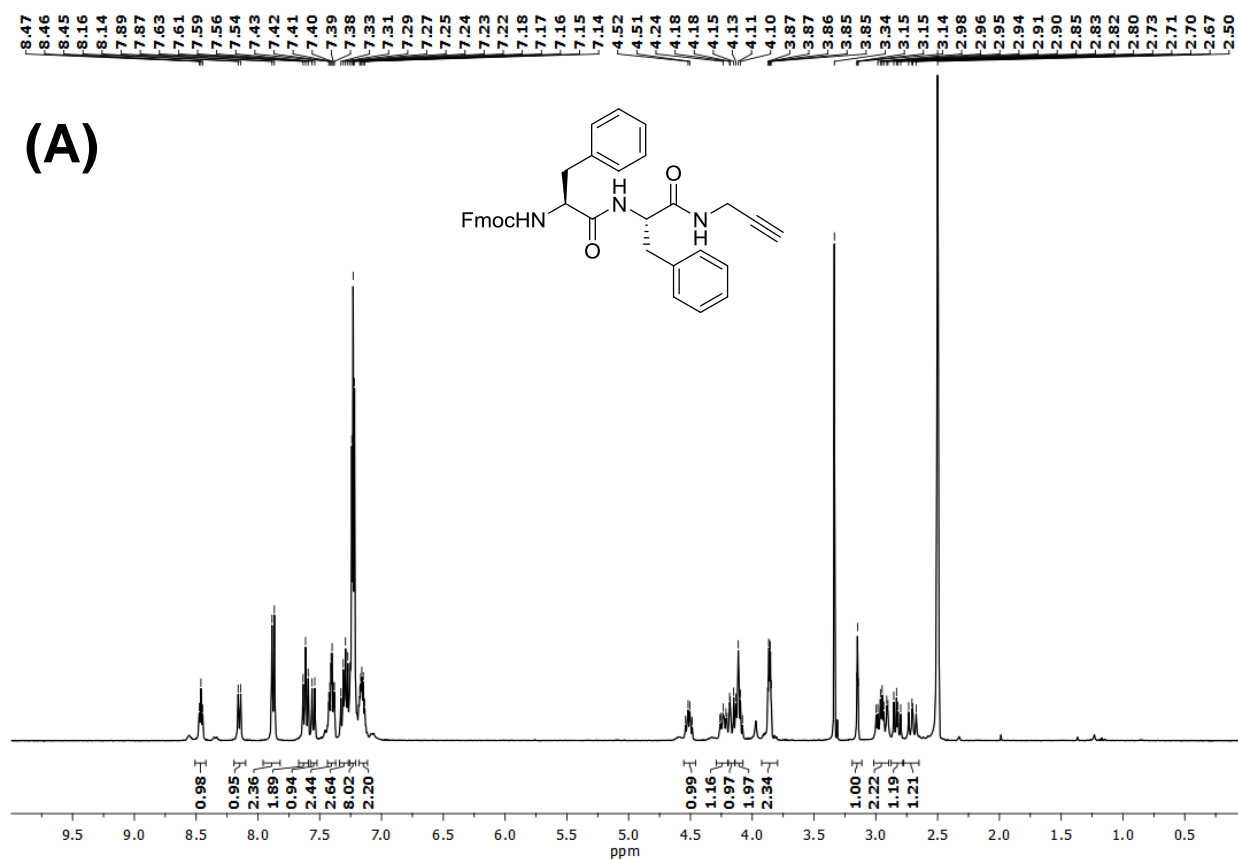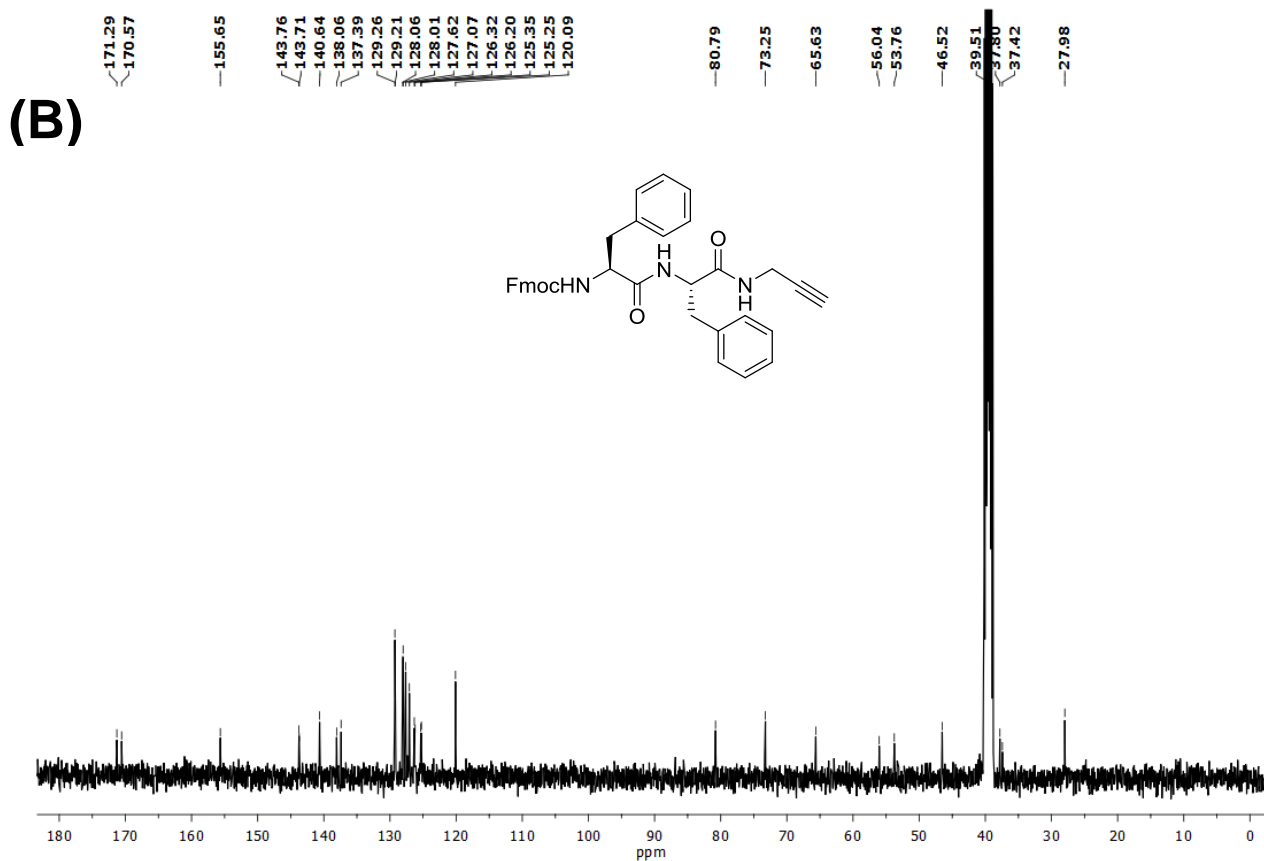

**Figure S23: (A) <sup>1</sup>H-NMR and (B) <sup>13</sup>C-NMR spectra of Fmoc-Phe-Phe-Propyne (S5).**

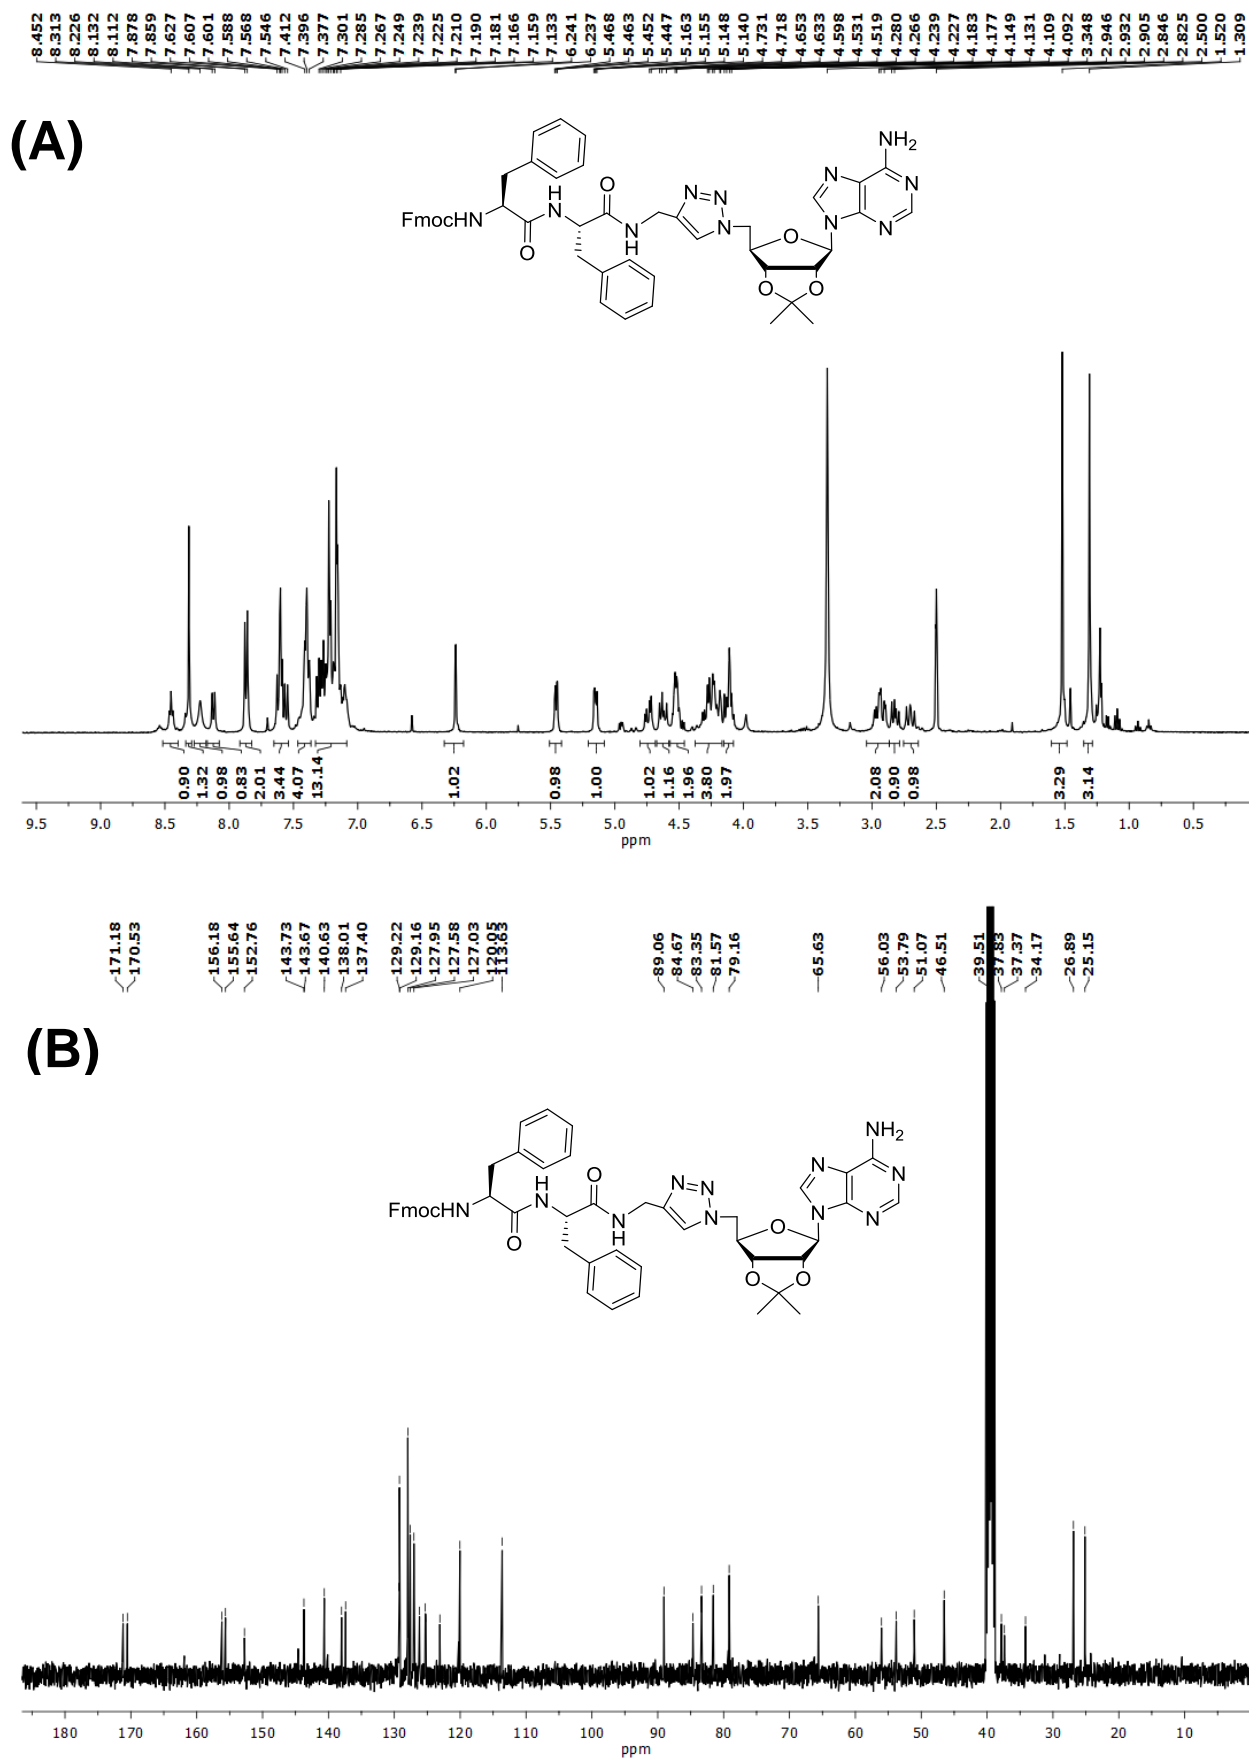

**Figure S24:** (A) <sup>1</sup>H-NMR and (B) <sup>13</sup>C-NMR spectra of Fmoc-Phe-Phe-tz-A<sup>NH<sub>2</sub></sup> (S6).

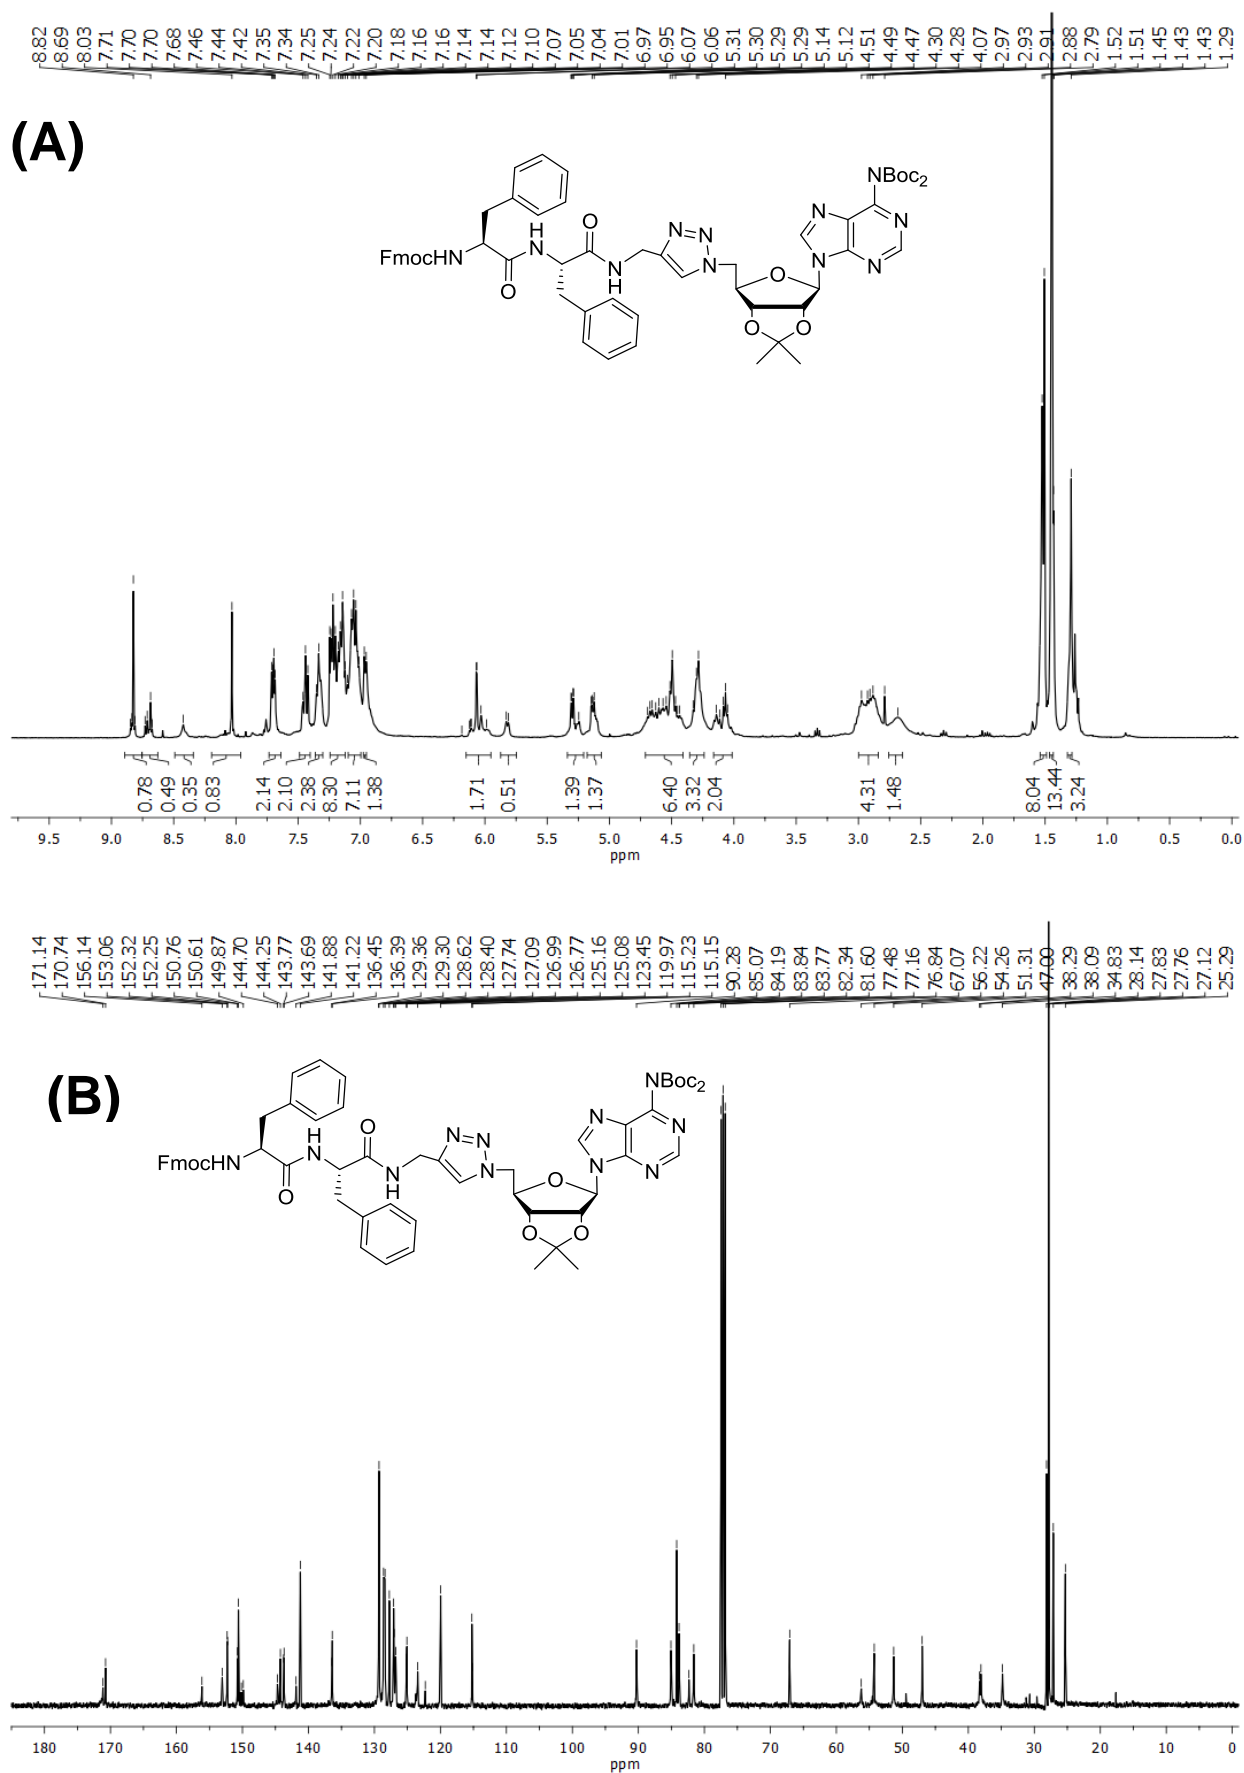

**Figure S25:** (A) <sup>1</sup>H-NMR and (B) <sup>13</sup>C-NMR spectra of Fmoc-Phe-Phe-tz-A<sup>N(Boc)<sub>2</sub></sup> (S7).

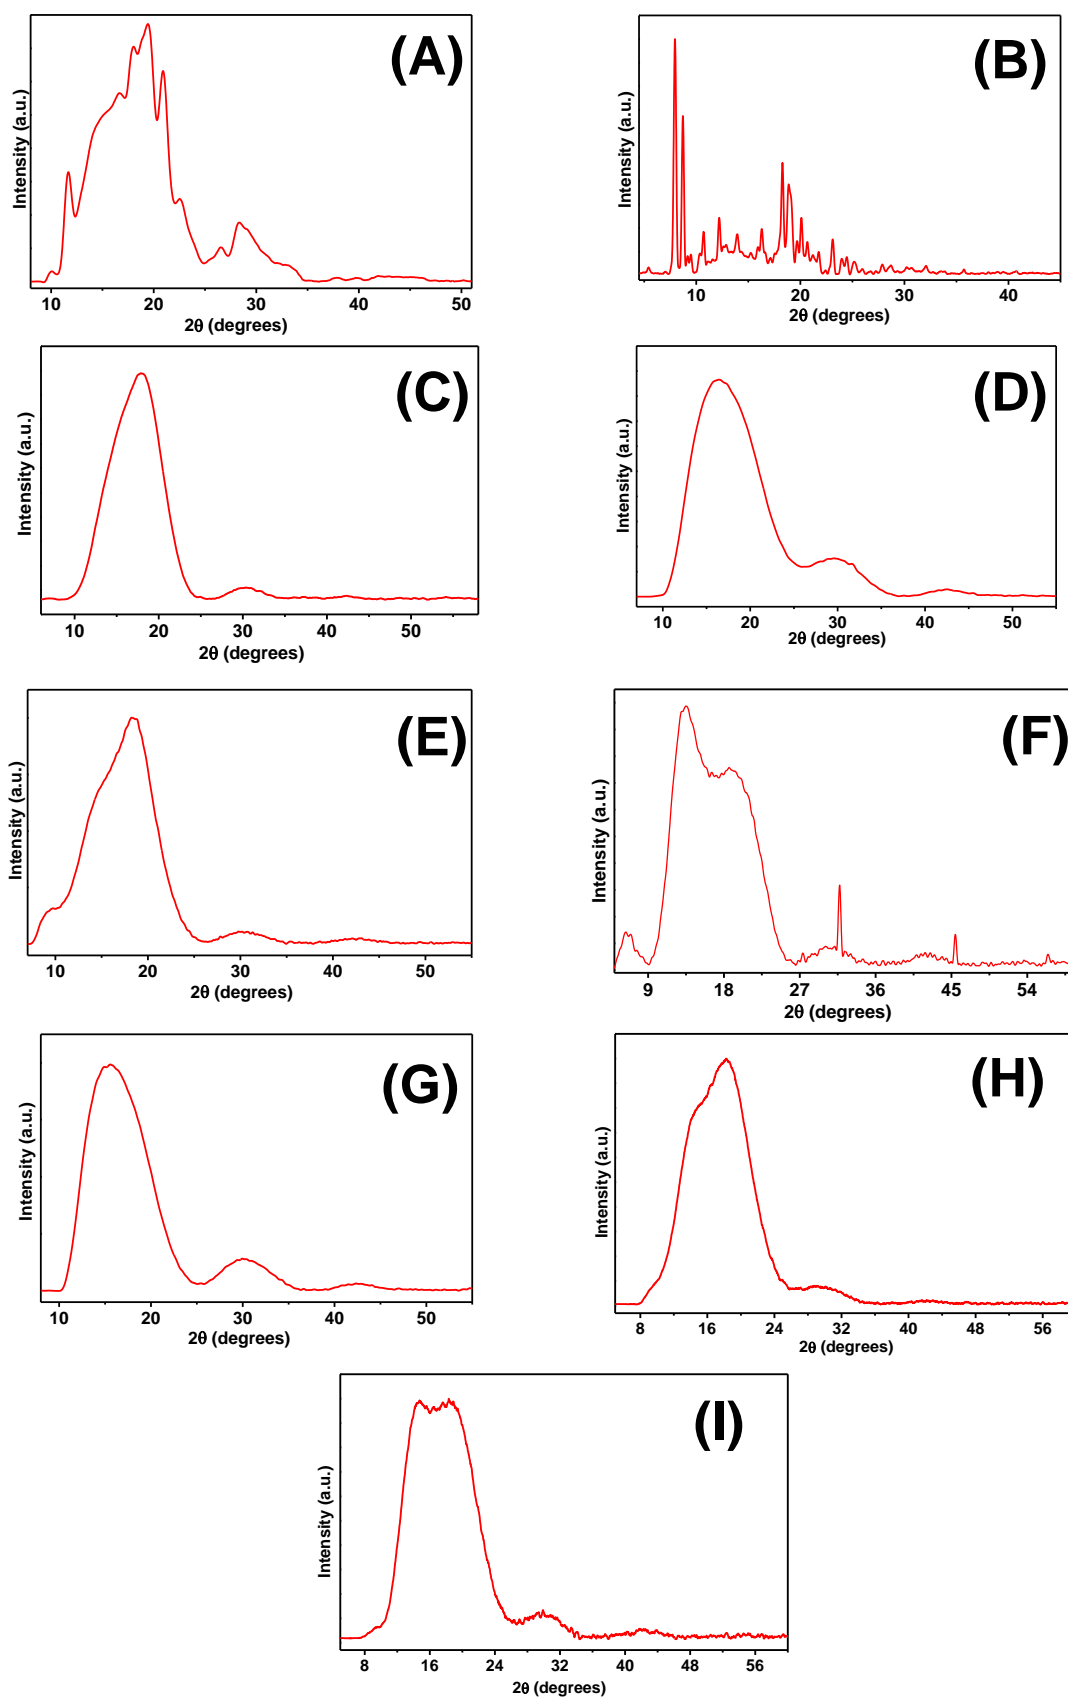

**Figure S26:** PXRD patterns of (A) peptide **2** (Boc-Phe-Phe-Propyne), (B) peptide **4** (Boc-Leu-Leu-Propyne), (C) peptide **7** (Boc-Phe-Phe-*tz*-A<sup>N(Boc)<sub>2</sub></sup>), (D) peptide **8** (Boc-Phe-Phe-*tz*-A<sup>NH<sub>2</sub></sup>), (E) peptide **10** (Boc-Leu-Leu-*tz*-A<sup>N(Boc)<sub>2</sub></sup>), (F) peptide **9** (H-Phe-Phe-*tz*-A<sup>NH<sub>2</sub></sup>), (G) peptide **12** (Boc-Phe-Phe-*am*-A<sup>N(Boc)<sub>2</sub></sup>), (H) peptide **15** (Boc-Phe-Phe-*tz*-U) and (I) peptide **16** (Boc-Phe-Phe-*tz*-T).

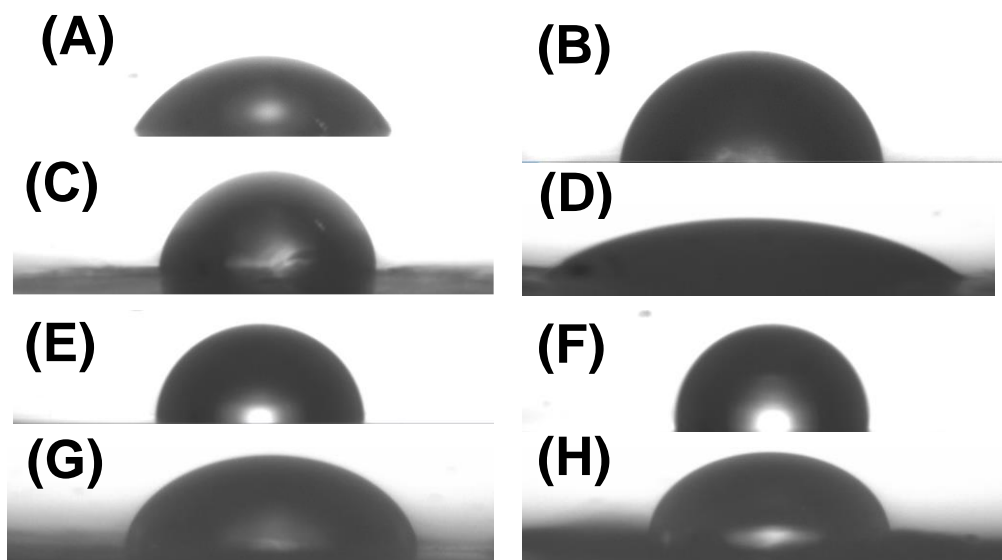

**Figure S27:** Images taken for contact angle measurement of (A) bare glass, (B) peptide **7** (Boc-Phe-Phe-*tz*-A<sup>N(Boc)<sub>2</sub></sup>), (C) peptide **8** (Boc-Phe-Phe-*tz*-A<sup>NH<sub>2</sub></sup>), (D) peptide **9** (H-Phe-Phe-*tz*-A<sup>NH<sub>2</sub></sup>), (E) peptide **10** (Boc-Leu-Leu-*tz*-A<sup>N(Boc)<sub>2</sub></sup>), (F) peptide **12** (Boc-Phe-Phe-*am*-A<sup>N(Boc)<sub>2</sub></sup>), (G) peptide **15** (Boc-Phe-Phe-*tz*-U) and (H) peptide **16** (Boc-Phe-Phe-*tz*-T).

**Table S1:** Contact angle (CA) measured for peptides on glass surface

| Sample/Surface                                                            | Contact angle (CA in degree) <sup>a</sup> | ΔCA (in degree) |
|---------------------------------------------------------------------------|-------------------------------------------|-----------------|
| Bare glass                                                                | 60 ± 2                                    | -               |
| Peptide <b>7</b> Boc-Phe-Phe- <i>tz</i> -A <sup>N(Boc)<sub>2</sub></sup>  | 84 ± 2                                    | +24             |
| Peptide <b>8</b> Boc-Phe-Phe- <i>tz</i> -A <sup>NH<sub>2</sub></sup>      | 81 ± 1                                    | +21             |
| Peptide <b>9</b> H-Phe-Phe- <i>tz</i> -A <sup>NH<sub>2</sub></sup>        | 32 ± 2                                    | -28             |
| Peptide <b>10</b> Boc-Leu-Leu- <i>tz</i> -A <sup>N(Boc)<sub>2</sub></sup> | 83 ± 2                                    | +23             |
| Peptide <b>12</b> Boc-Phe-Phe- <i>am</i> -A <sup>N(Boc)<sub>2</sub></sup> | 93 ± 1                                    | +33             |
| Peptide <b>15</b> Boc-Phe-Phe- <i>tz</i> -U                               | 73 ± 2                                    | +13             |
| Peptide <b>16</b> Boc-Phe-Phe- <i>tz</i> -T                               | 75 ± 2                                    | +15             |

<sup>a</sup> Data are the mean ± SD (n=4)

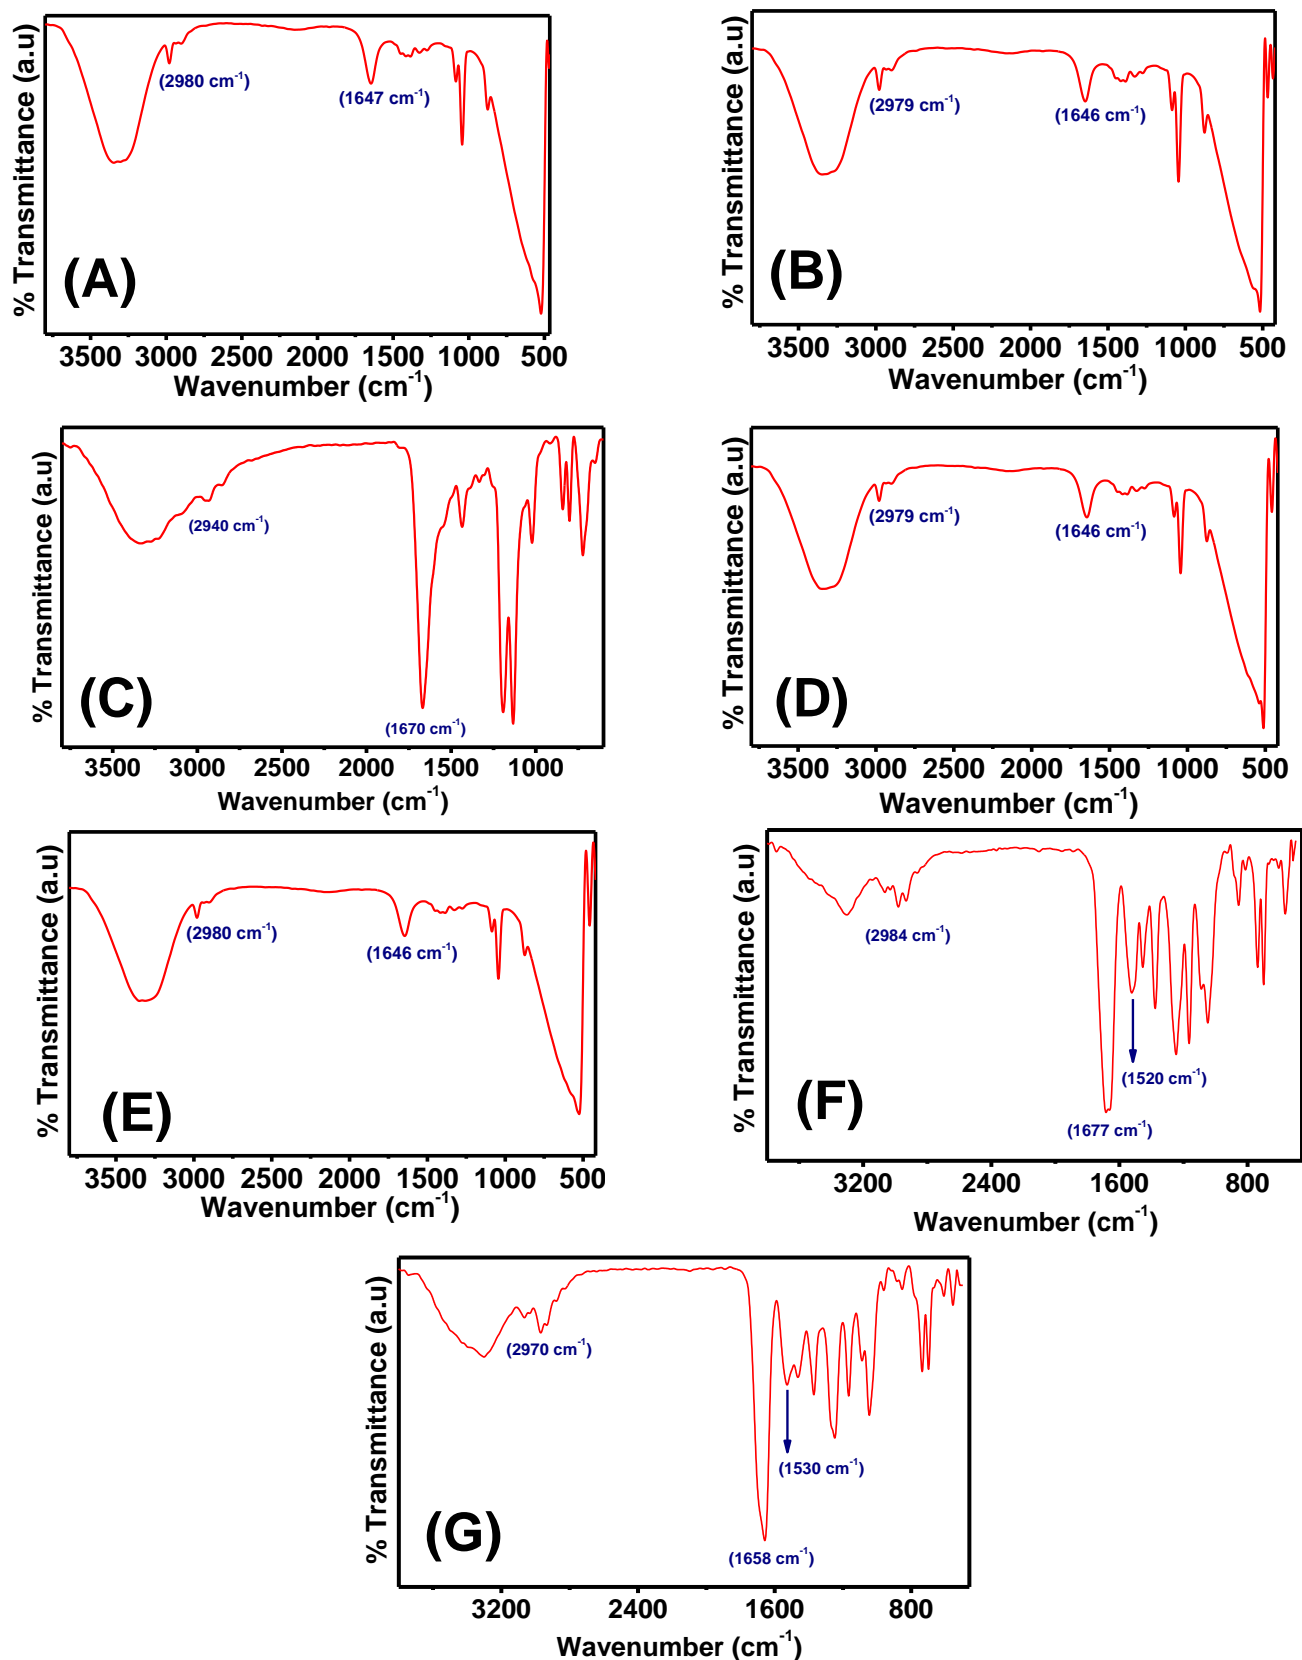

**Figure S28:** FTIR spectra of (A) peptide 7 (Boc-Phe-Phe-*tz*-A<sup>N(Boc)<sub>2</sub></sup>), (B) peptide 8 (Boc-Phe-Phe-*tz*-A<sup>NH<sub>2</sub></sup>), (C) peptide 9 (H-Phe-Phe-*tz*-A<sup>NH<sub>2</sub></sup>), (D) peptide 10 (Boc-Leu-Leu-*tz*-A<sup>N(Boc)<sub>2</sub></sup>), (E) peptide 12 (Boc-Phe-Phe-*am*-A<sup>N(Boc)<sub>2</sub></sup>), (F) peptide 15 (Boc-Phe-Phe-*tz*-U) and (G) peptide 16 (Boc-Phe-Phe-*tz*-T).

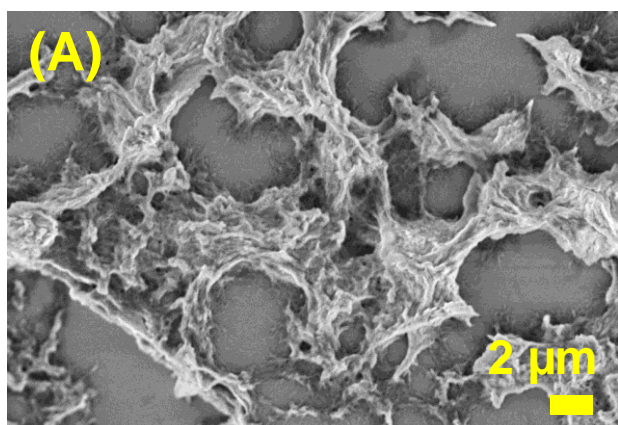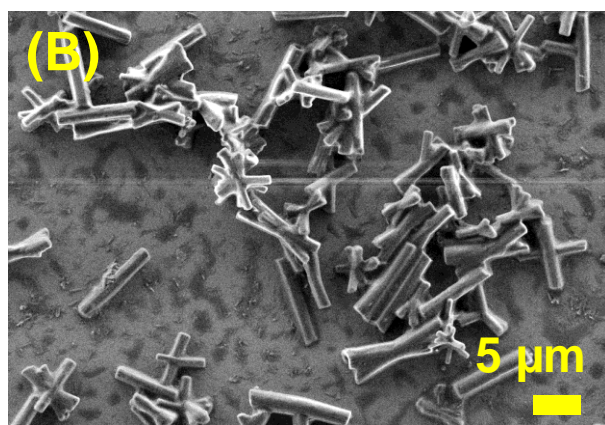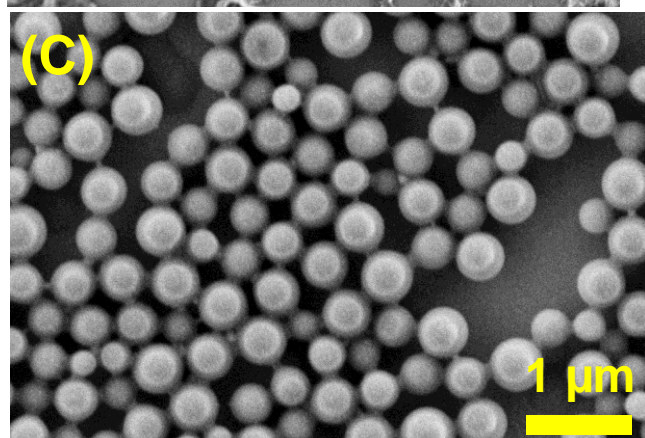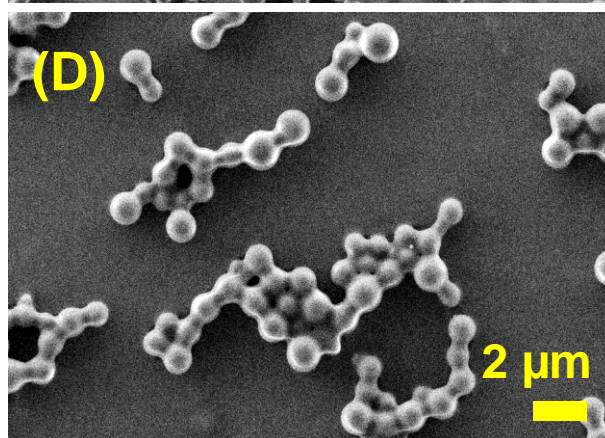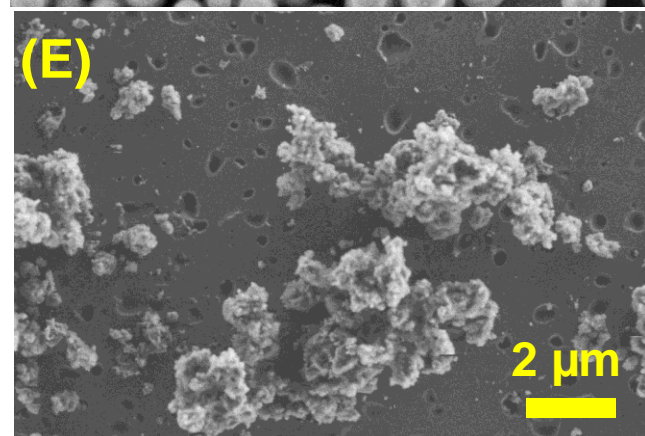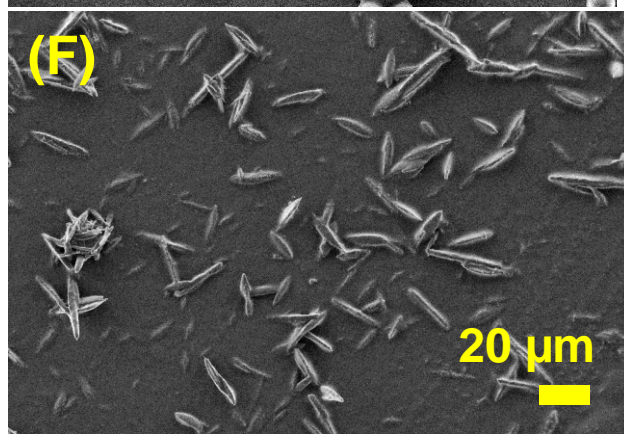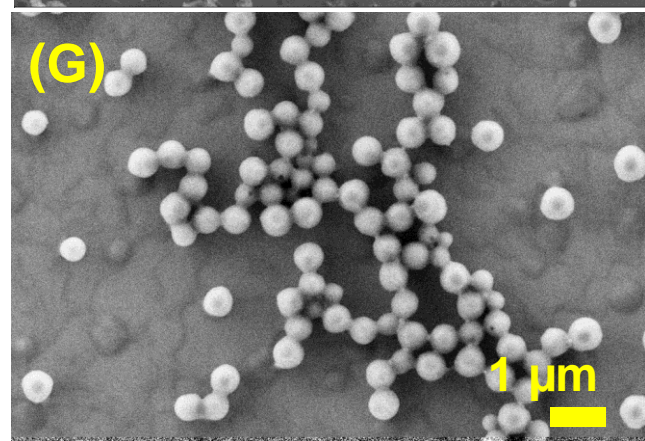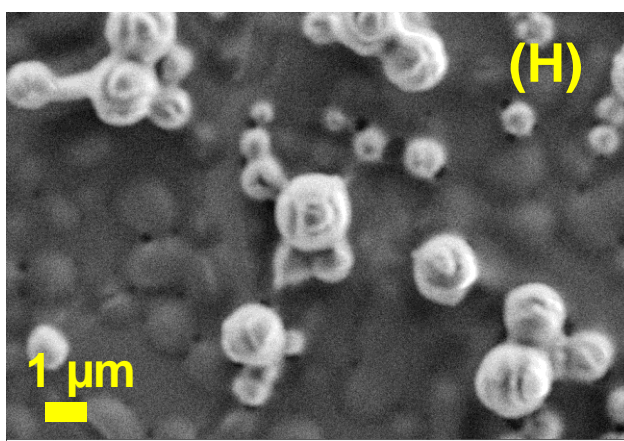

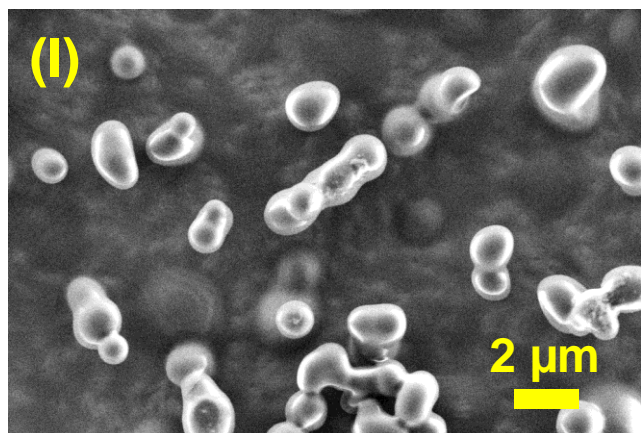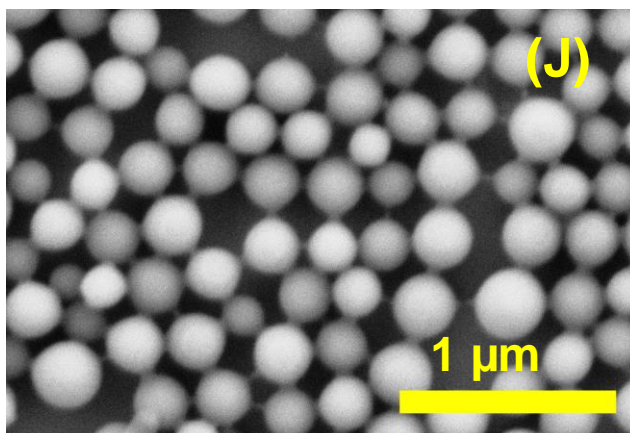

**Figure S29:** SEM images of (A) peptide **2** (Boc-Phe-Phe-Propyne), (B) peptide **4** (Boc-Leu-Leu-Propyne), (C) peptide **7** (Boc-Phe-Phe-*tz*-A<sup>N(Boc)<sub>2</sub></sup>), (D) peptide **8** (Boc-Phe-Phe-*tz*-A<sup>NH<sub>2</sub></sup>), (E) peptide **9** (H-Phe-Phe-*tz*-A<sup>NH<sub>2</sub></sup>), (F) peptide **10** (Boc-Leu-Leu-*tz*-A<sup>N(Boc)<sub>2</sub></sup>) (G) peptide **12** (Boc-Phe-Phe-*am*-A<sup>N(Boc)<sub>2</sub></sup>), (H) peptide **15** (Boc-Phe-Phe-*tz*-T), (I) peptide **16** (Boc-Phe-Phe-*tz*-T) and (J) peptide **S7** (Fmoc-Phe-Phe-*tz*-A<sup>N(Boc)<sub>2</sub></sup>).

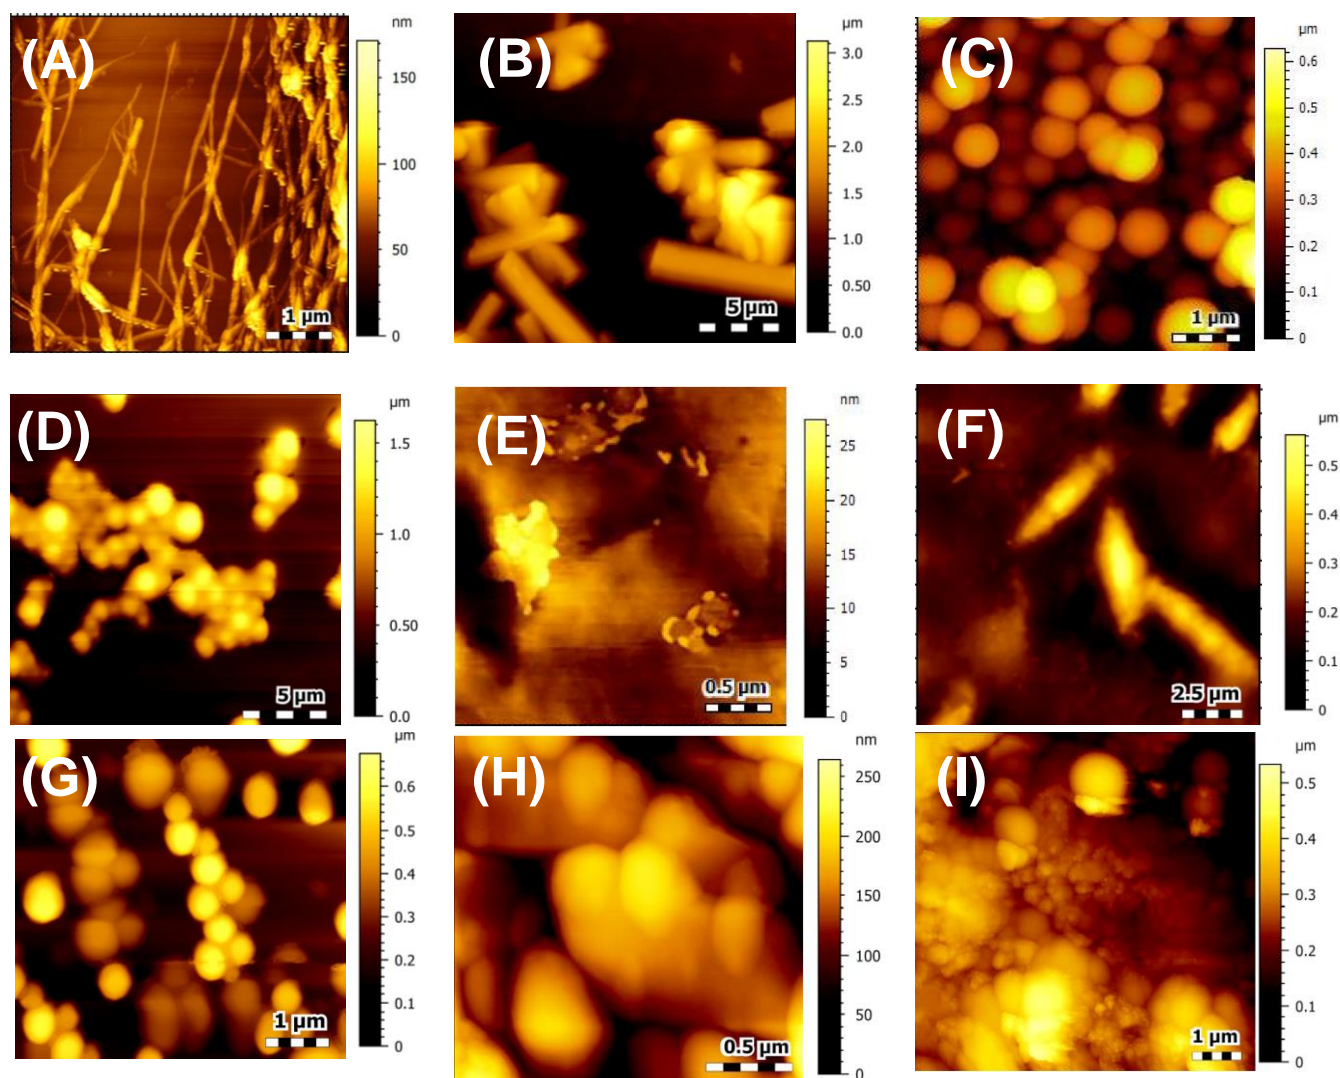

**Figure S30:** AFM topography images of (A) fibrous dipeptide **2** (Boc-Phe-Phe-Propyne), (B) rod-like dipeptide **4** (Boc-Leu-Leu-Propyne), (C) perfect spheres of peptide **7** (Boc-Phe-Phe-*tz*-A<sup>N(Boc)<sub>2</sub></sup>), (D) agglomerated spheres of peptide **8** (Boc-Phe-Phe-*tz*-A<sup>NH<sub>2</sub></sup>), (E) fully deprotected peptide **9** (H-Phe-Phe-*tz*-A<sup>NH<sub>2</sub></sup>), (F) spindle like peptide **10** (Boc-Leu-Leu-*tz*-A<sup>N(Boc)<sub>2</sub></sup>), (G) spherical peptide **12** (Boc-Phe-Phe-*am*-A<sup>N(Boc)<sub>2</sub></sup>), (H) peptide **15** (Boc-Phe-Phe-*tz*-T) and (I) peptide **16** (Boc-Phe-Phe-*tz*-T).

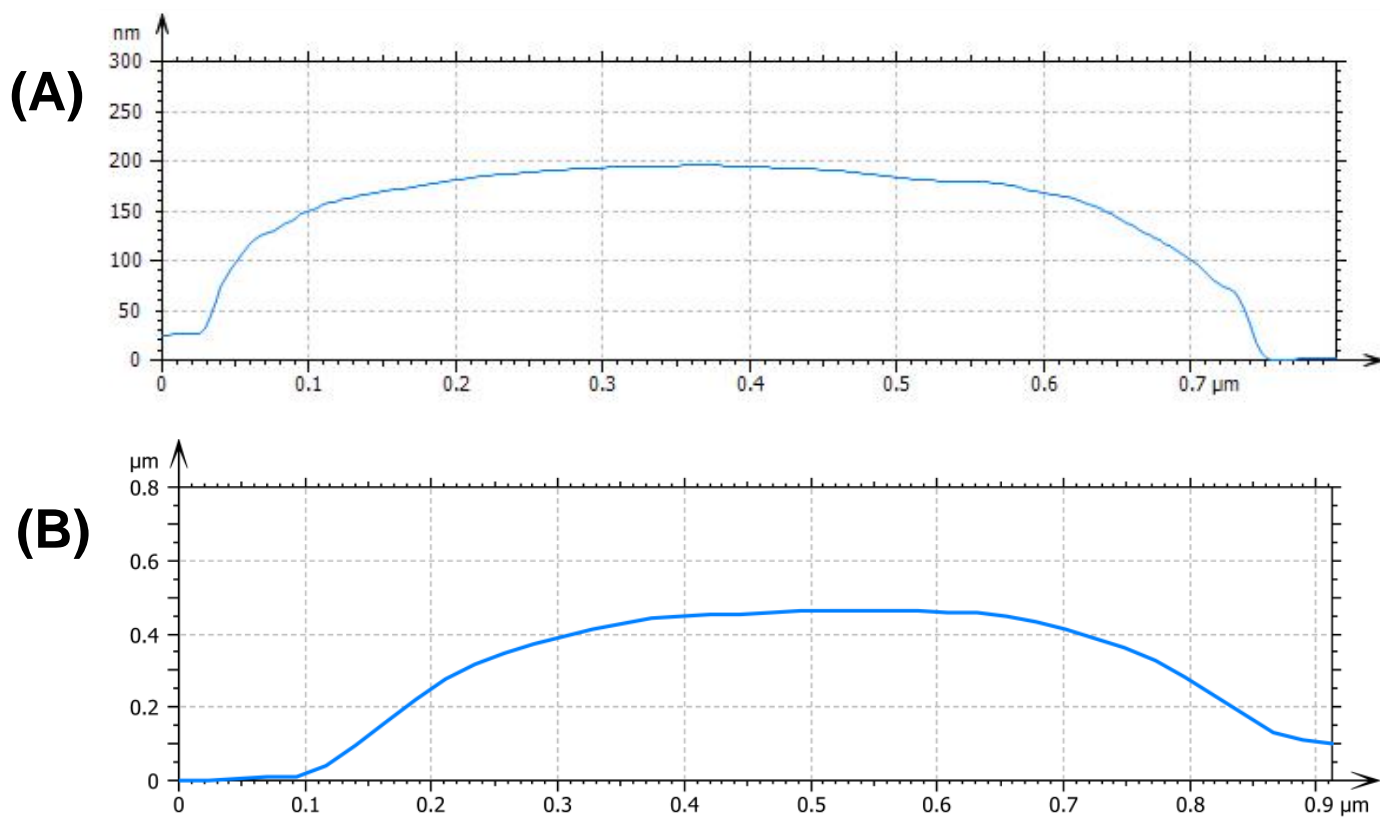

**Figure S31:** Height profiles diagrams of perfect spheres of **(A)** peptide **7** (Boc-Phe-Phe-*tz*-A<sup>N(Boc)<sub>2</sub></sup>), **(B)** peptide **12** (Boc-Phe-Phe-*am*-A<sup>N(Boc)<sub>2</sub></sup>) obtained from AFM.

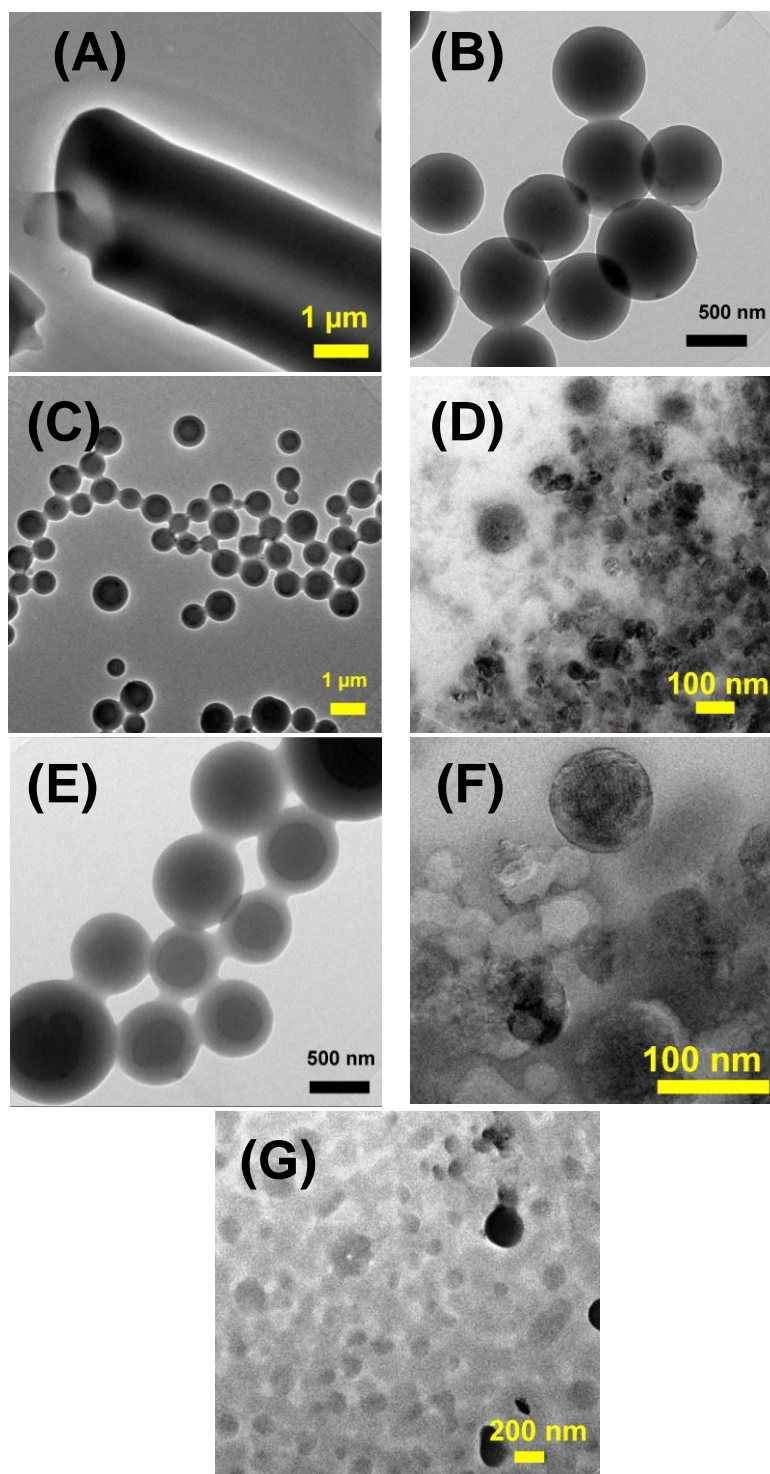

**Figure S32:** HRTEM images of (A) dipeptide **4** (Boc-Leu-Leu-Propyne) showing hollow tubular structure, (B) solid spheres of peptide **7** (Boc-Phe-Phe-*tz*-A<sup>N(Boc)<sub>2</sub></sup>), (C) interlinked spheres of peptide **8** (Boc-Phe-Phe-*tz*-A<sup>NH<sub>2</sub></sup>), (D) fully deprotected peptide **9** (H-Phe-Phe-*tz*-A<sup>NH<sub>2</sub></sup>), (E) interlinked spherical peptide **12** (Boc-Phe-Phe-*am*-A<sup>N(Boc)<sub>2</sub></sup>), (F) peptide **15** (Boc-Phe-Phe-*tz*-U) and (G) peptide **16** (Boc-Phe-Phe-*tz*-T).

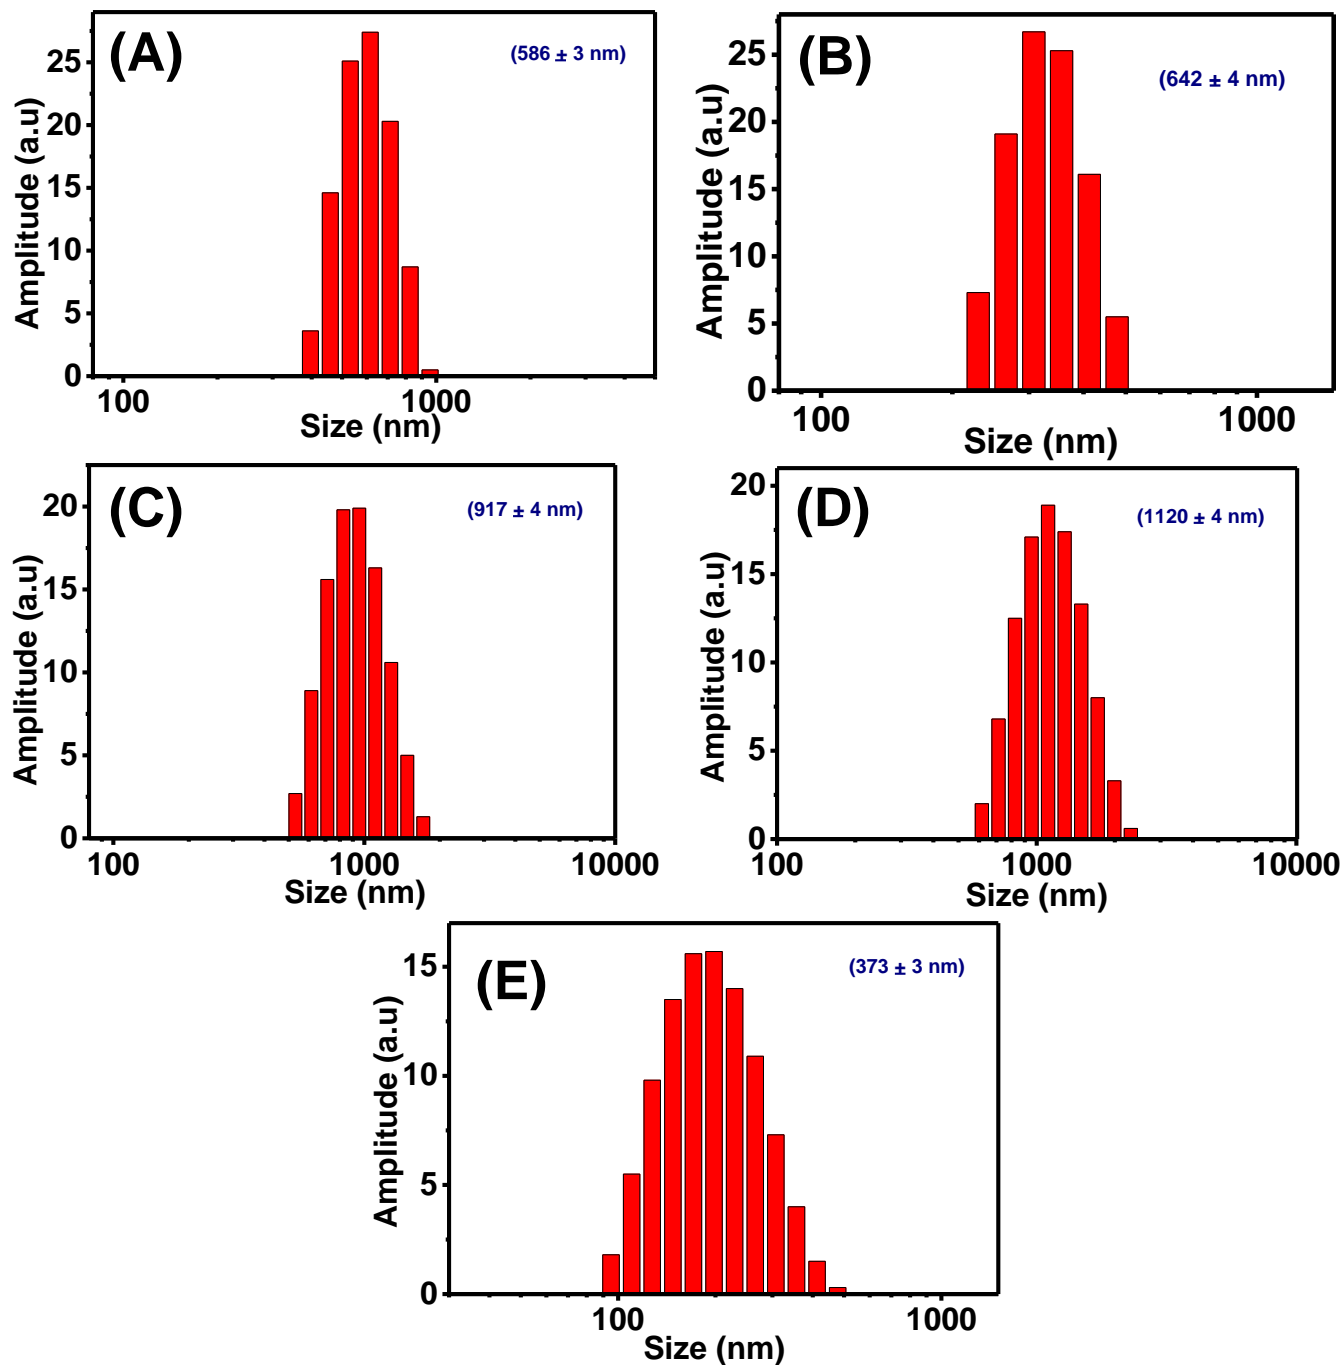

**Figure S33:** DLS spectra of (A) peptide 7 (Boc-Phe-Phe-*tz*-A<sup>N(Boc)<sub>2</sub></sup>) without lyophilization (PDI = 0.015), (B) peptide 7 after lyophilization (PDI = 0.012), (C) peptide 7 with higher concentration (4 mg/mL, PDI = 0.142), (D) peptide 7 after 10 days of incubation (PDI = 0.224), (E) peptide 12 (Boc-Phe-Phe-*am*-A<sup>N(Boc)<sub>2</sub></sup>) (PDI = 0.168).

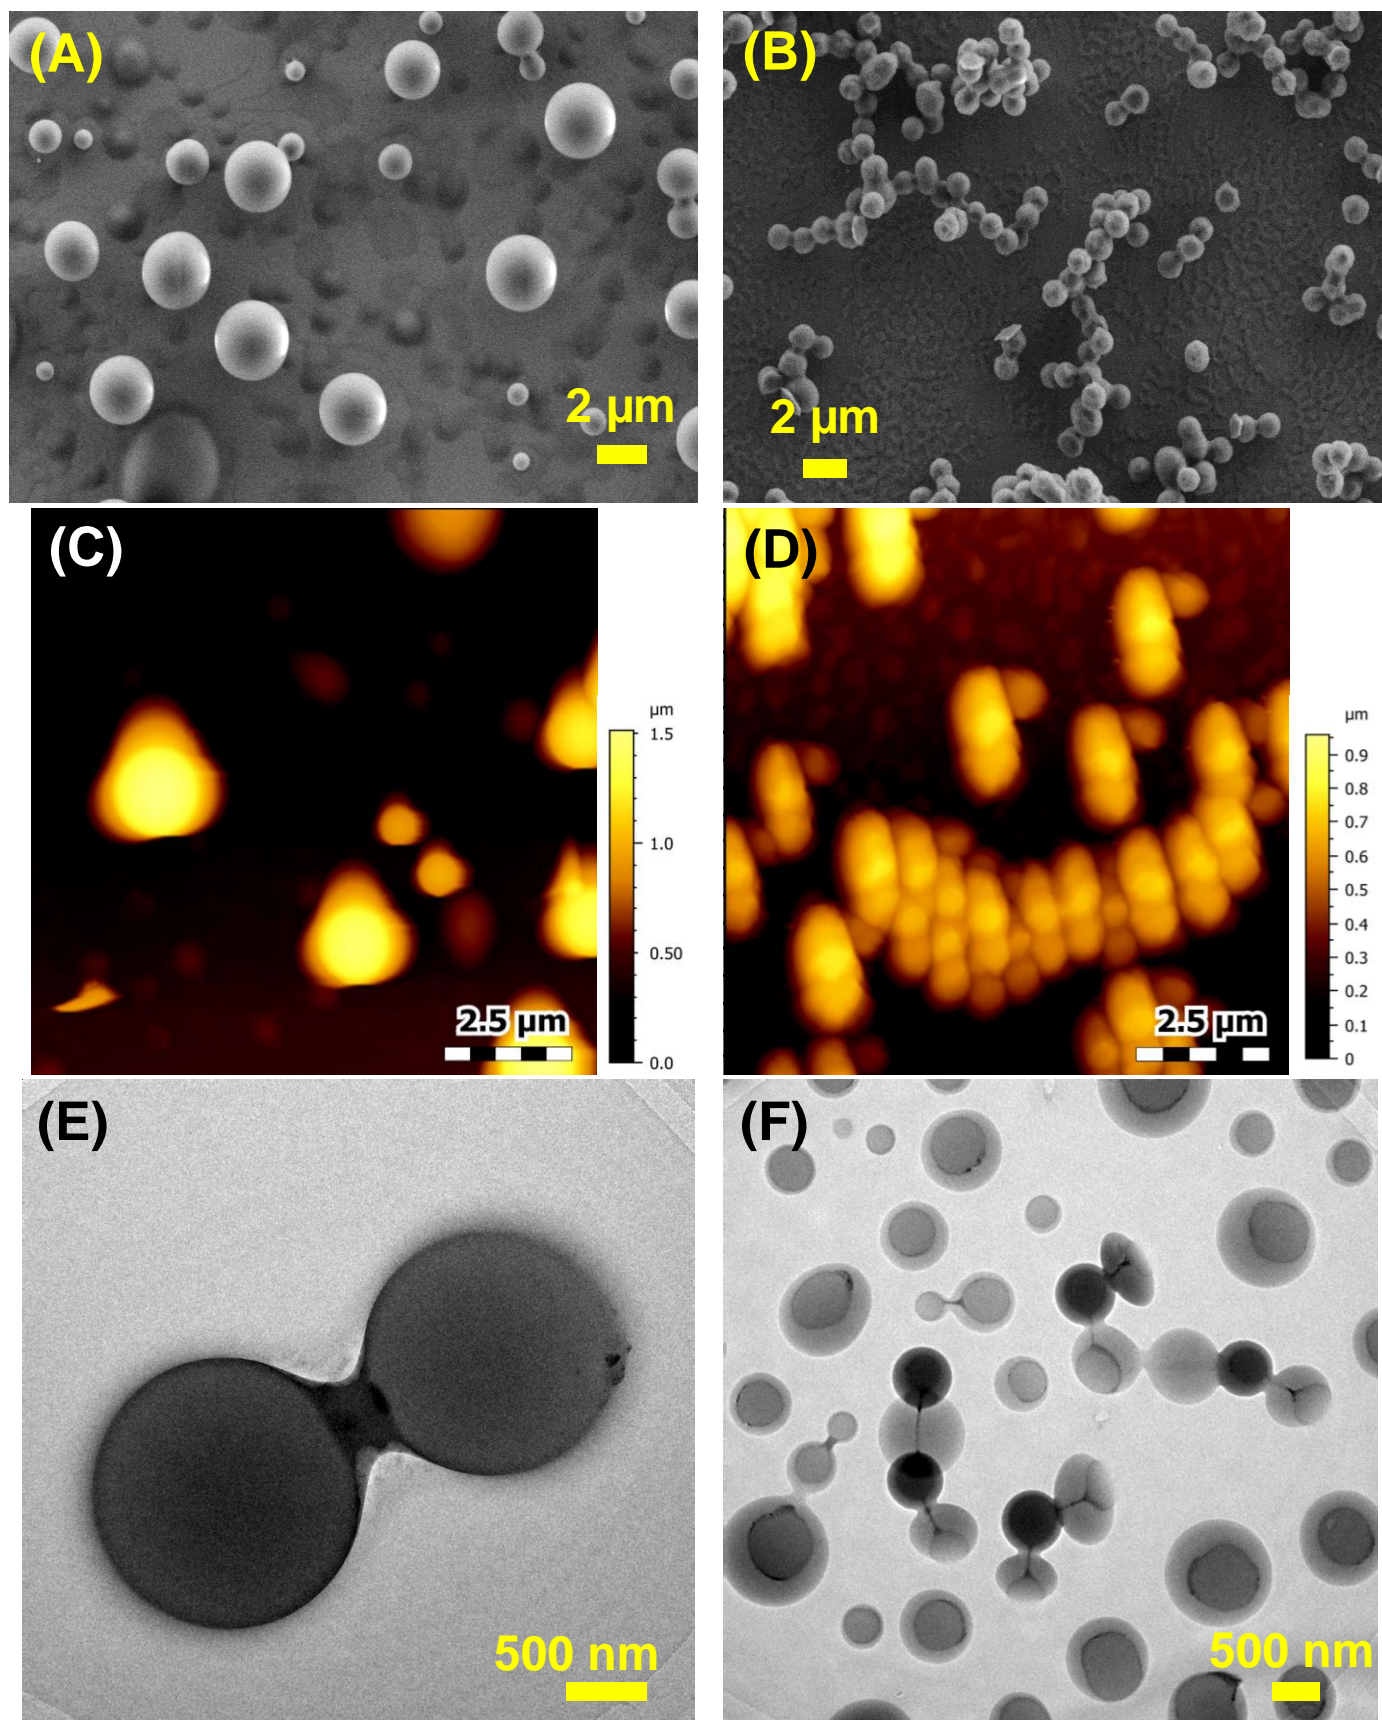

**Figure S34:** SEM (A), AFM (C) and HRTEM (E) images of peptide **7** (Boc-Phe-Phe-*tz*-A<sup>N(Boc)<sub>2</sub></sup>) with higher concentration (4 mg / mL) and SEM (B), AFM (D) and HRTEM (F) images of peptide **7** after 10 days of incubation respectively. Necklace formations are evident from SEM, AFM and HRTEM (Figure S24:B,D and F).

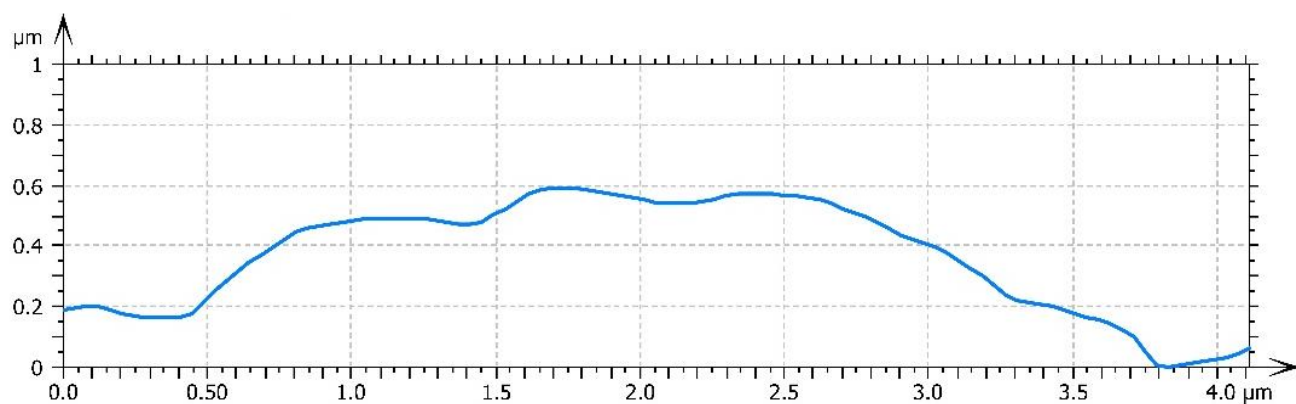

**Figure S35:** Height profiles diagrams of (B) aggregated peptide **7** (Boc-Phe-Phe-*tz*-A<sup>N(Boc)<sub>2</sub></sup>) after 10 days of incubation obtained from AFM.

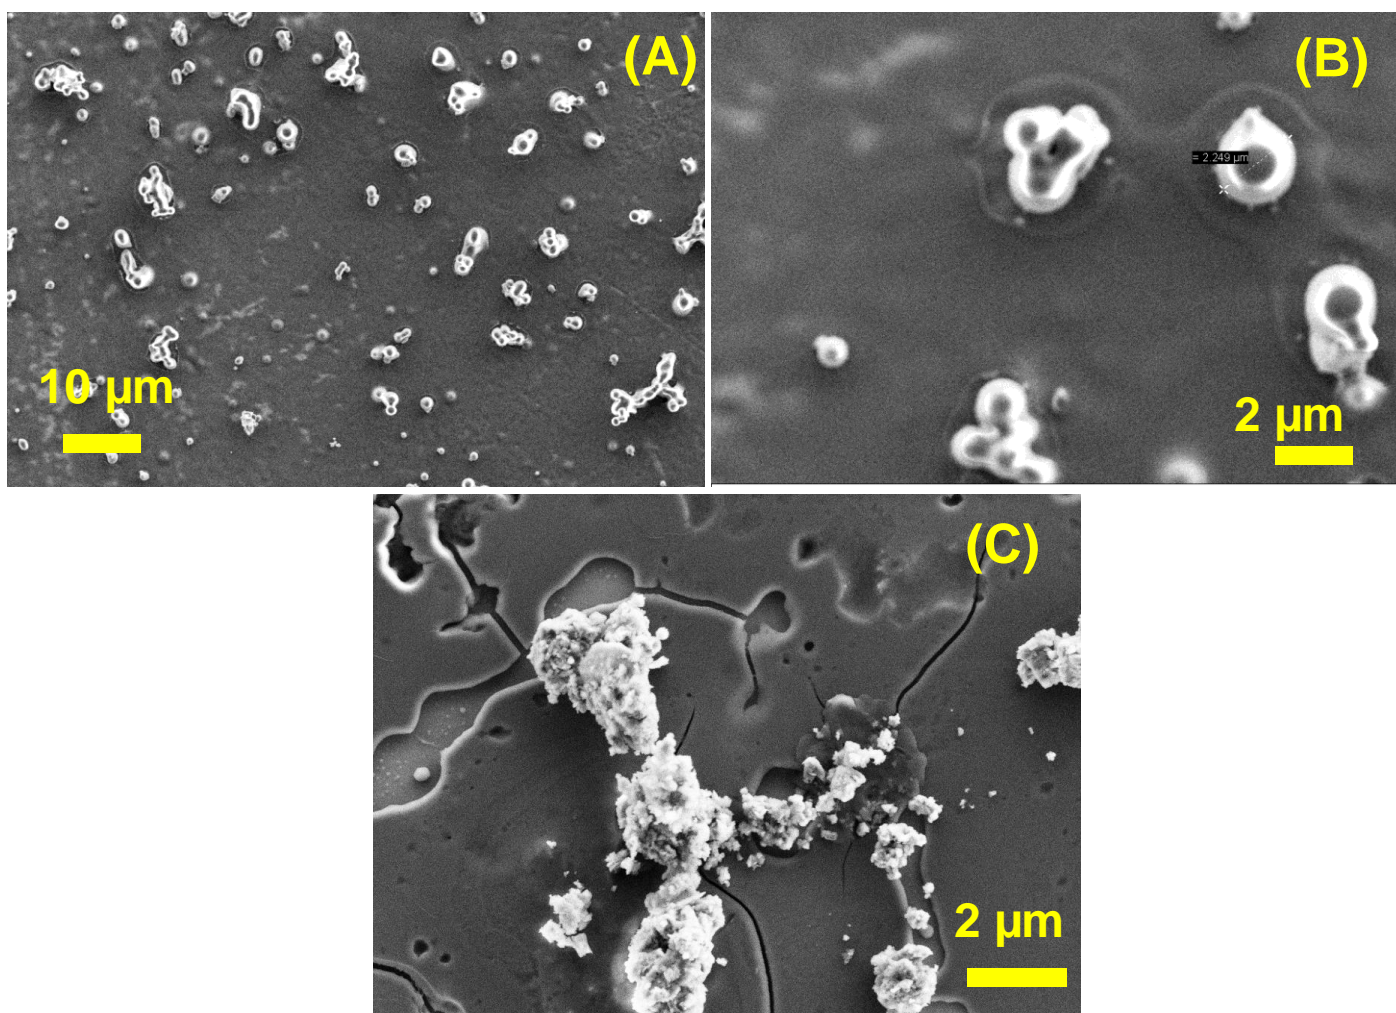

**Figure S36:** SEM images of (A), (B) peptide **8** (Boc-Phe-Phe-*tz*-A<sup>NH<sub>2</sub></sup>) and (C) peptide **9** (H-Phe-Phe-*tz*-A<sup>NH<sub>2</sub></sup>) with higher concentration (4 mg / mL)

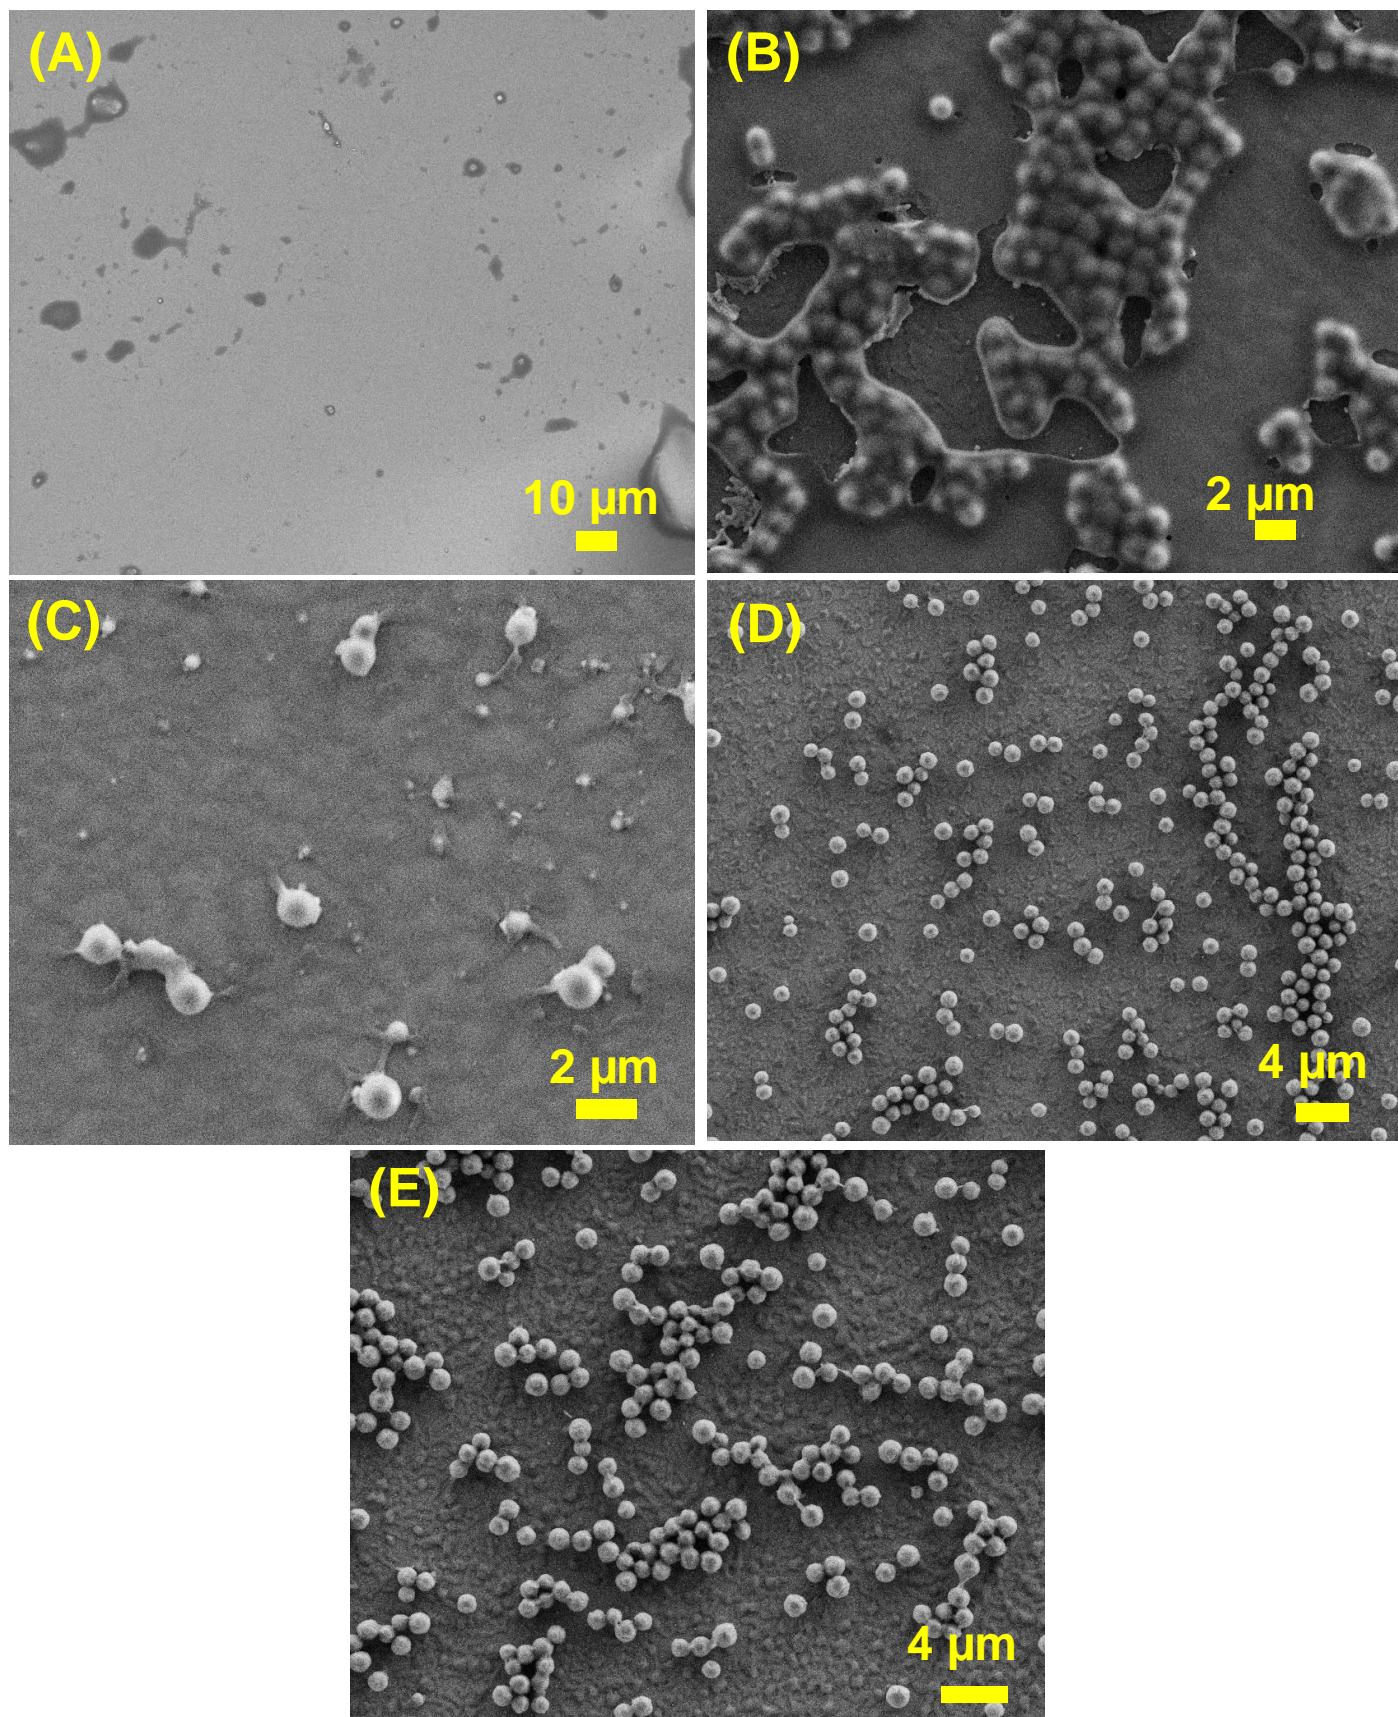

**Figure S37:** SEM images of peptide **7** (Boc-Phe-Phe-*t*z-A<sup>N(Boc)<sub>2</sub></sup>) (A) at pH 2, (B) at pH 6, (C) at pH 10, (D) after heating at 100  $^{\circ}\text{C}$ , (E) after heating at 200  $^{\circ}\text{C}$

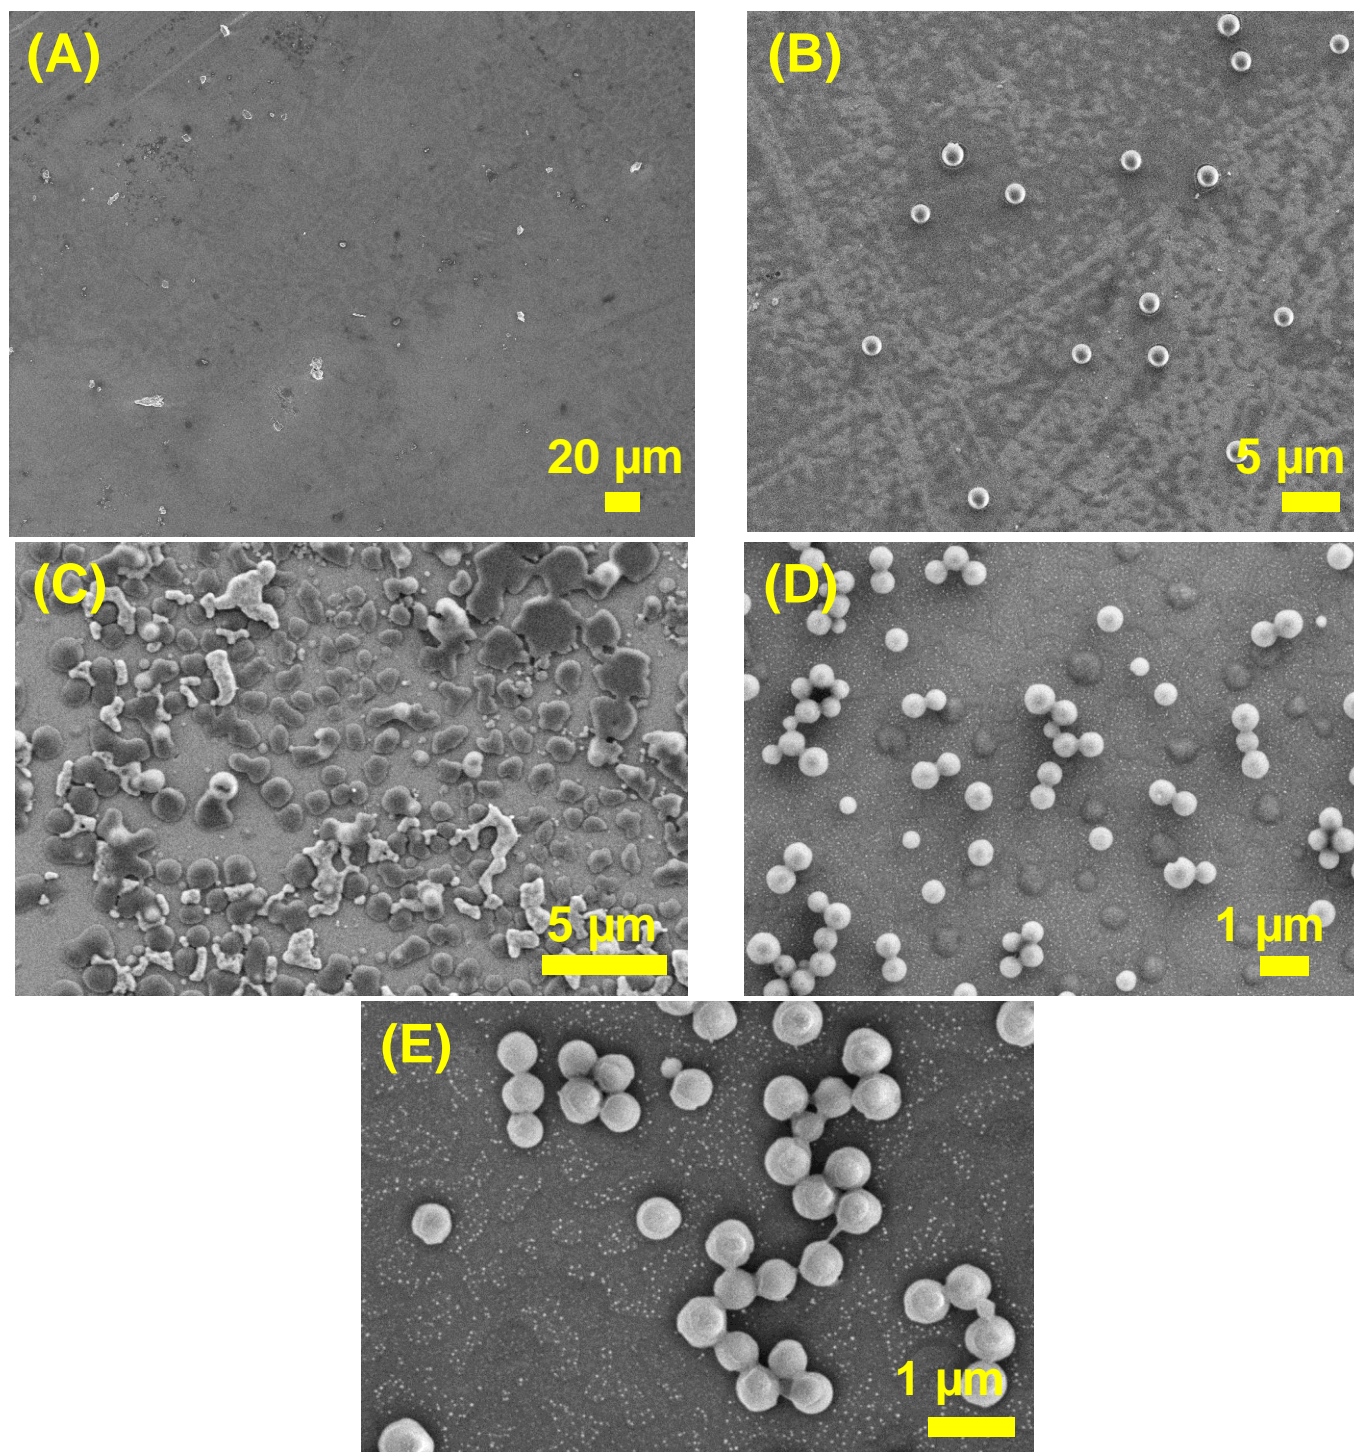

**Figure S38:** SEM images of peptide **12** (Boc-Phe-Phe-*am*-A<sup>N(Boc)<sub>2</sub></sup>) (A) at pH 2, (B) at pH 6, (C) at pH 10, (D) after heating at 100 °C, (E) after heating at 200 °C.

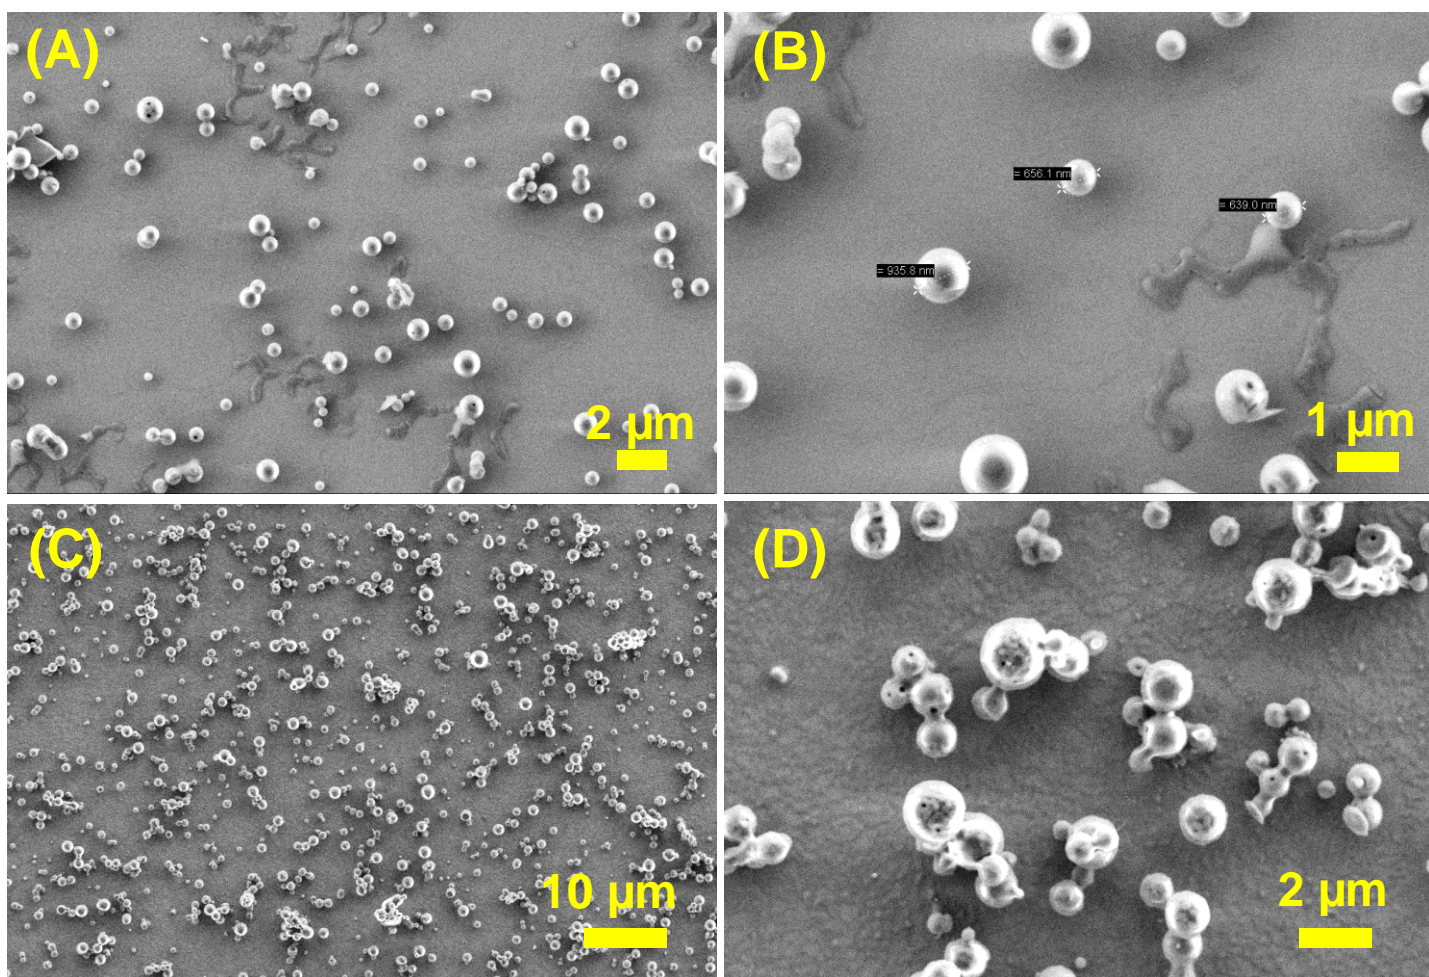

**Figure S39:** SEM images of peptide **7** (Boc-Phe-Phe-*tz*-A<sup>N(Boc)<sub>2</sub></sup>) (A), (B) after addition of 1.0 equiv. of Zn(NO<sub>3</sub>)<sub>2</sub> and (C), (D) after addition of 1.0 equiv. of Cu(NO<sub>3</sub>)<sub>2</sub>.

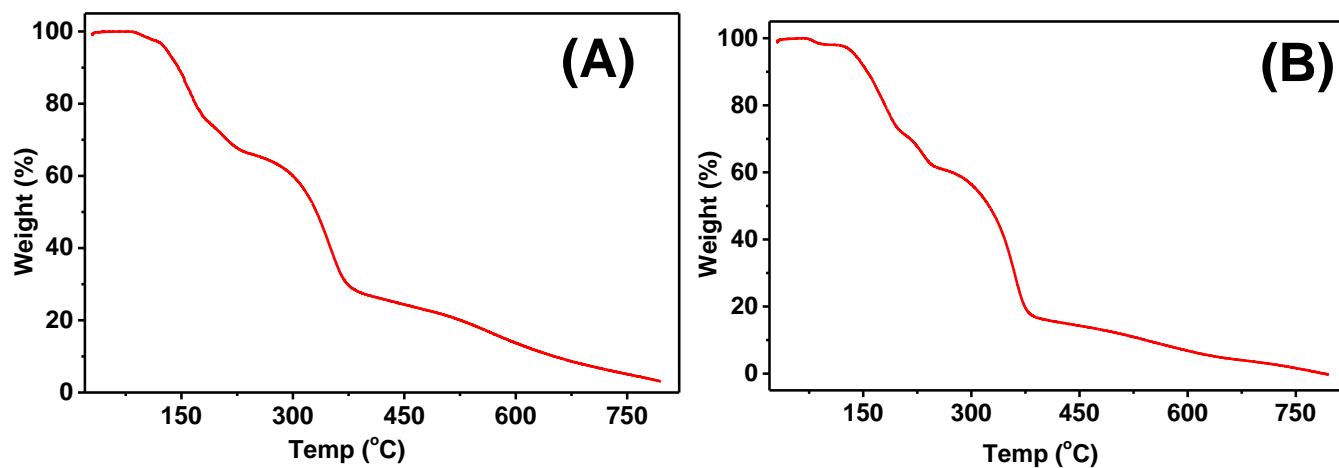

**Figure S40:** TGA of (A) peptide **7** (Boc-Phe-Phe-*tz*-A<sup>N(Boc)<sub>2</sub></sup>) and (B) peptide **12** (Boc-Phe-Phe-*am*-A<sup>N(Boc)<sub>2</sub></sup>).

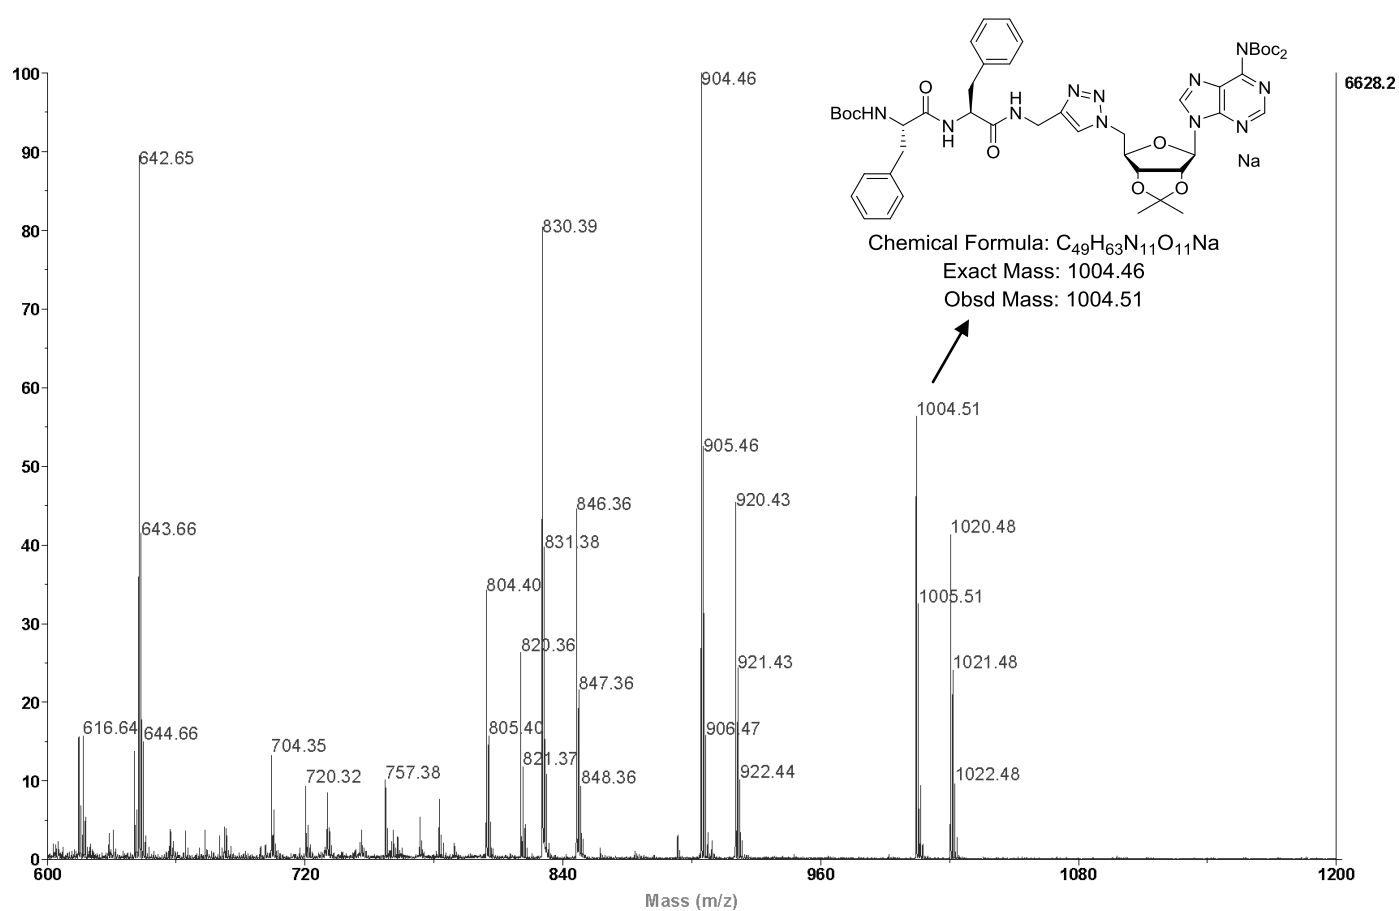

**Figure S41:** MALDI spectrum after thermal stability experiment of peptide **7** (Boc-Phe-Phe-*tz*-A<sup>N(Boc)<sub>2</sub></sup>)

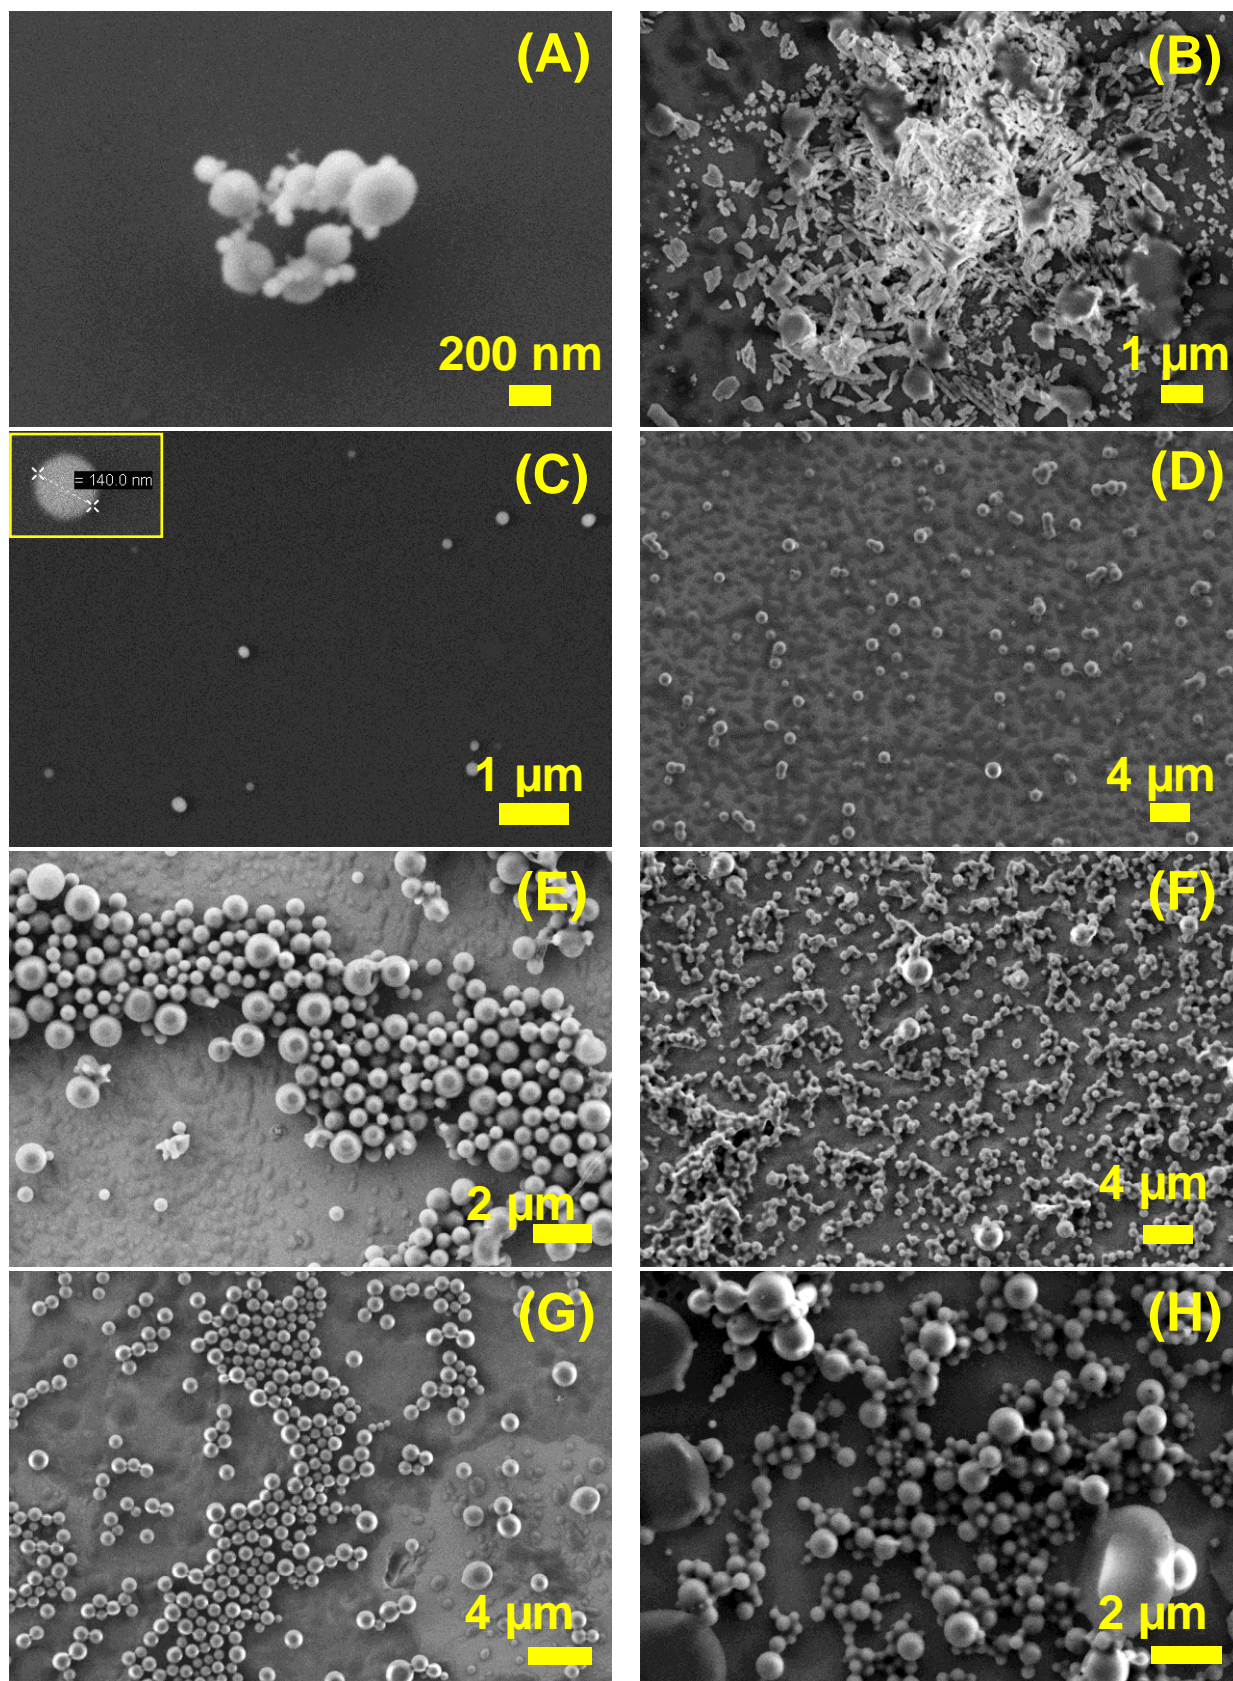

**Figure S42:** Solvent dependent morphology in SEM images of peptide **7** (Boc-Phe-Phe-*tz*-A<sup>N(Boc)<sub>2</sub></sup>): (A) in toluene, (B) in isopropyl alcohol, (C) in HFIP, (D) in ethanol, (E) in 7:1 MeOH and water, (F) in 1:1 MeOH and water, (G) in 1:1 CHCl<sub>3</sub> and MeOH, and (H) in 1:1 THF and water.

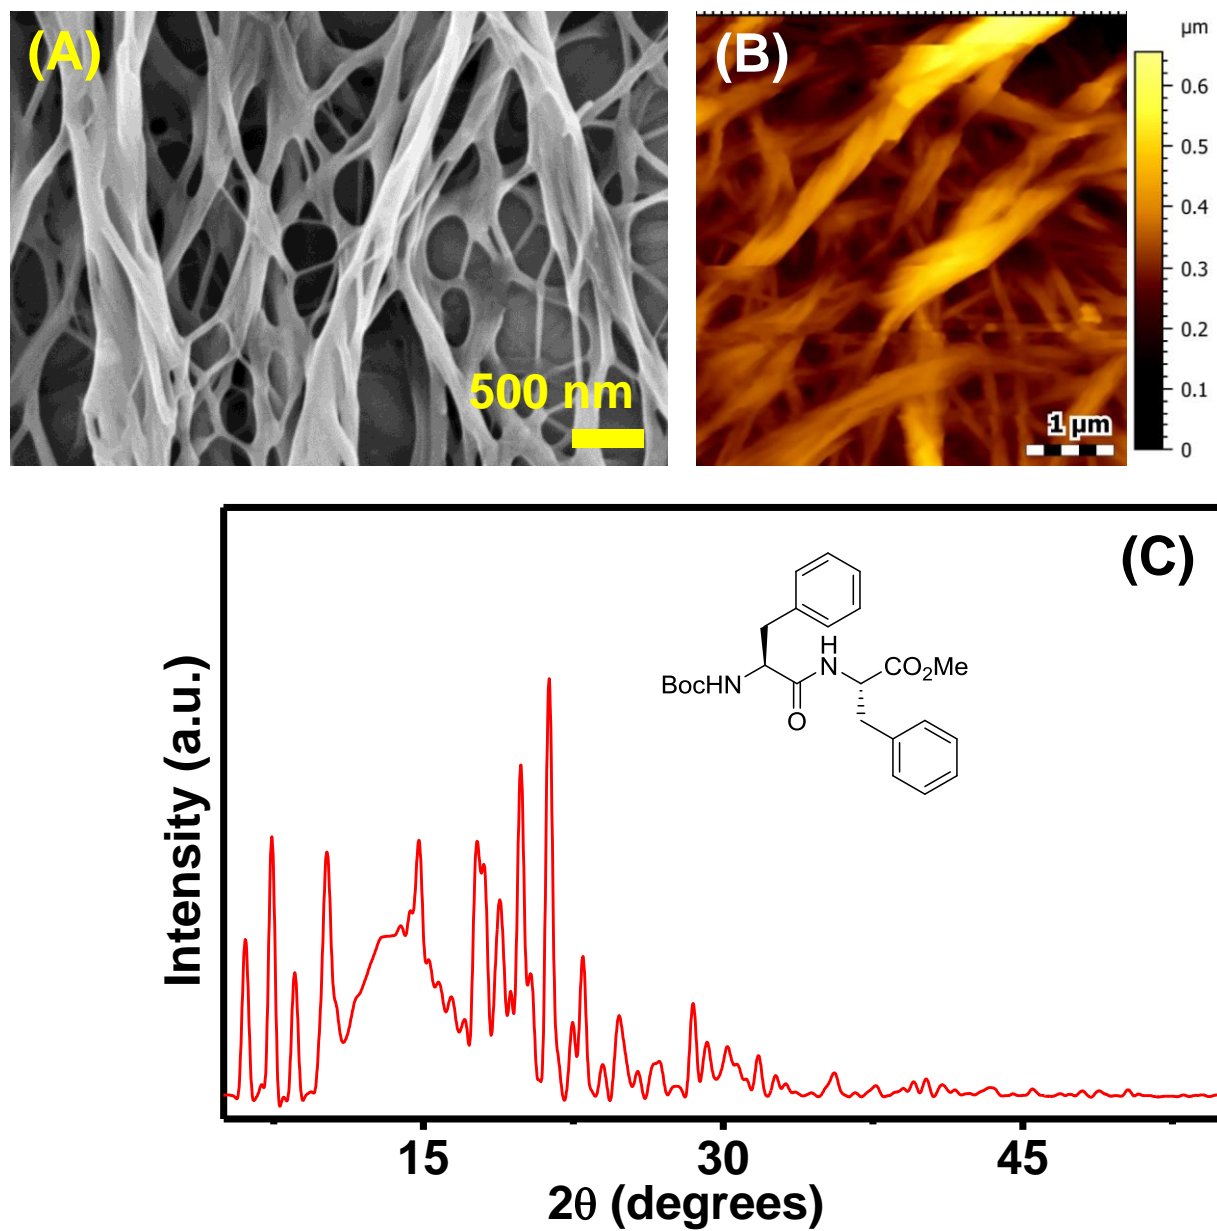

**Figure S43:** SEM image (A), AFM image (B) and PXRD pattern (C) of BocPhePheOMe in 1:1 ethanol and water after lyophilization in HFIP.

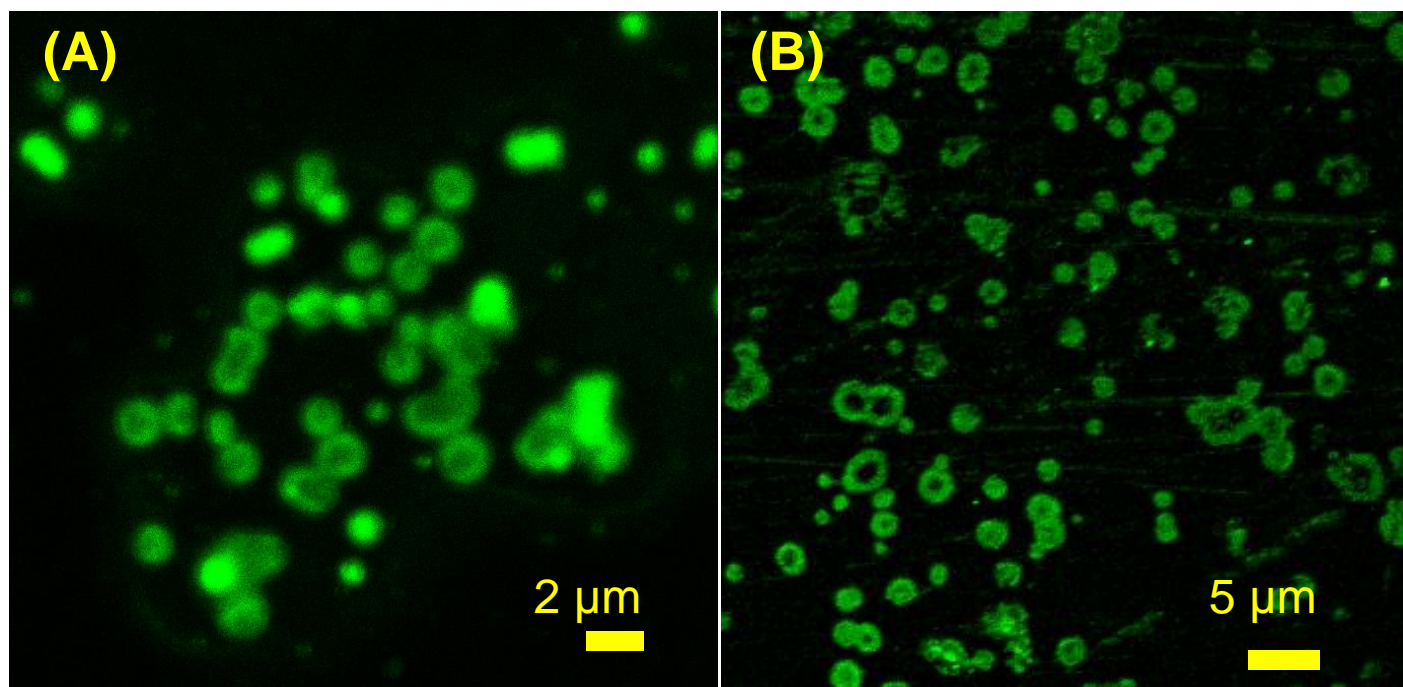

**Figure S44:** Confocal microscope images of fluorescent dye encapsulated (A, B) peptide **7** (Boc-Phe-Phe-*tz*-A<sup>N(Boc)<sub>2</sub></sup>).

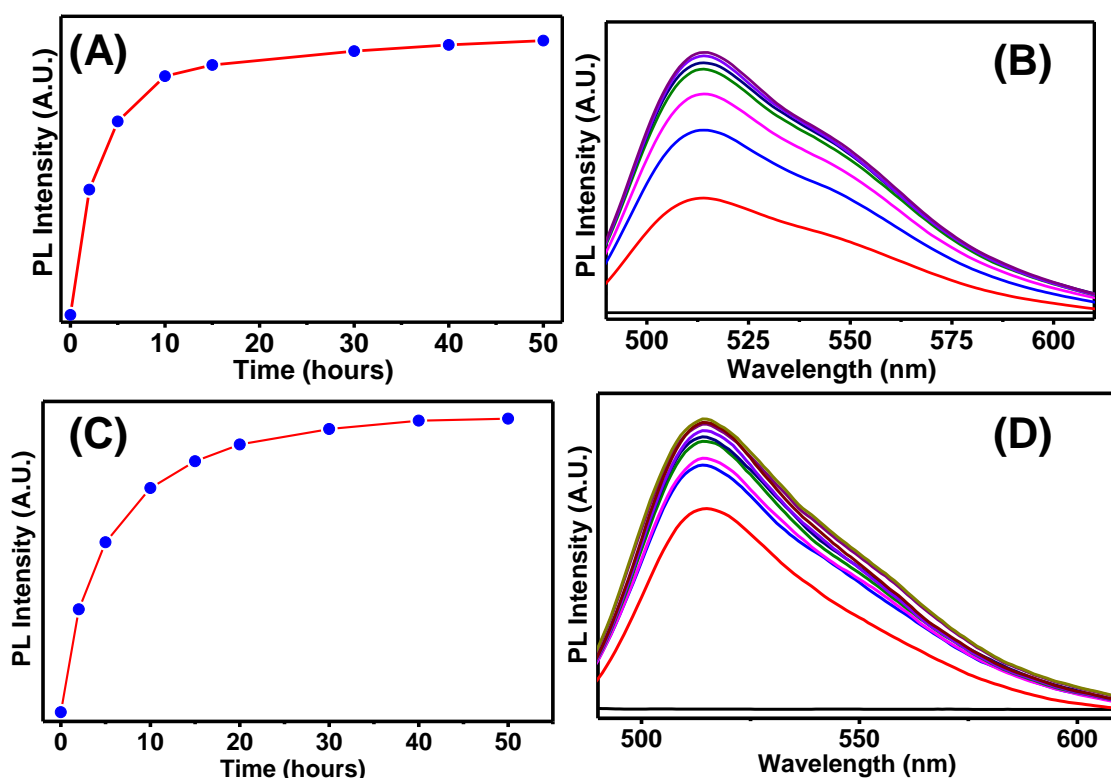

**Figure S45:** The increasing fluorescence intensity of the solution outside the dialysis tube containing **CF** encapsulated peptide **7** (Boc-Phe-Phe-*tz*-A<sup>N(Boc)<sub>2</sub></sup>), after the addition of 3 eq. of (A) dicationic peptide (BocLysLysOMe) and (C) arginine into dialysis tube ( $\lambda_{\text{ex}} = 417\text{nm}$ ). Fluorescence emission spectra of carboxyfluorescein (at 517 nm) showing increasing intensity after the addition of (B) dicationic peptide and (D) arginine into **CF** encapsulated peptide **7** (Boc-Phe-Phe-*tz*-A<sup>N(Boc)<sub>2</sub></sup>).

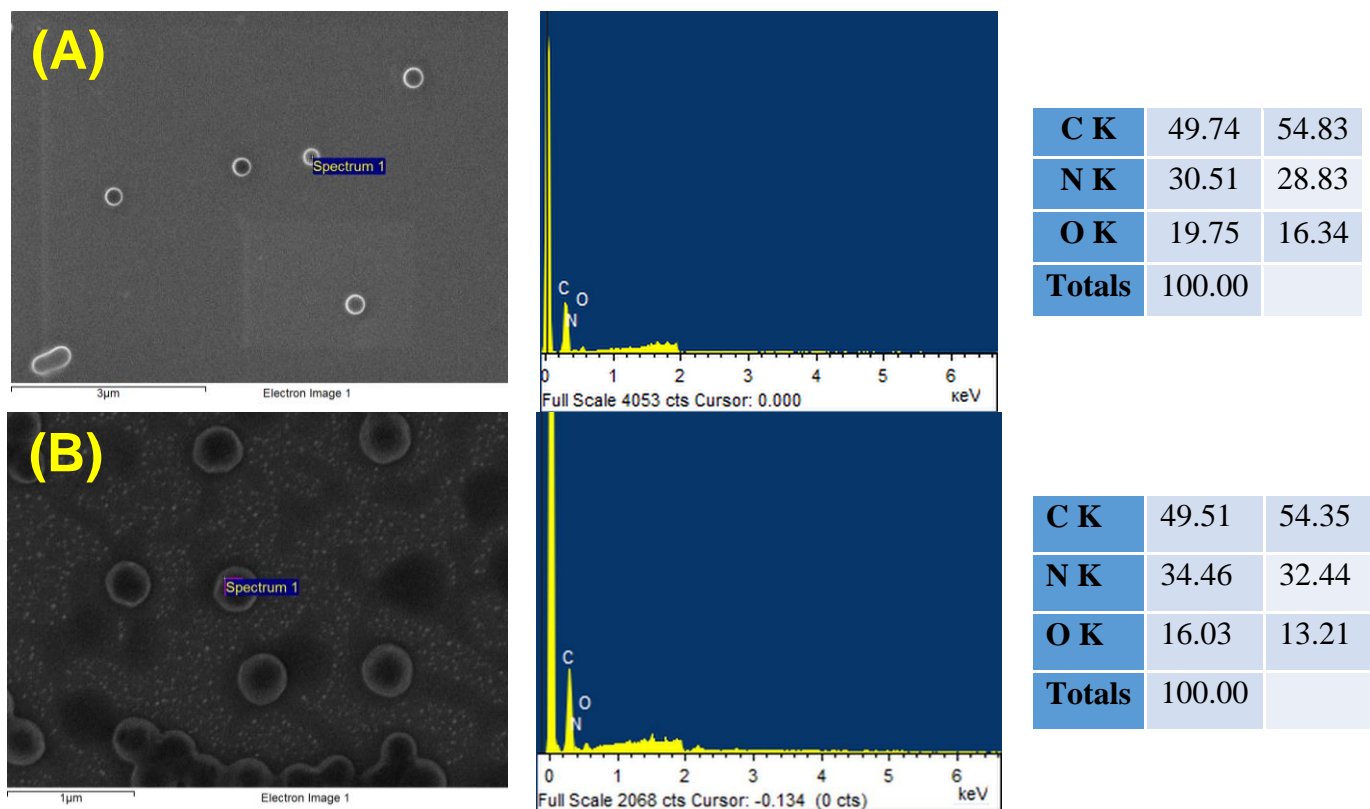

**Figure S46:** EDX images of (A) peptide **7** (Boc-Phe-Phe-*tz*-A<sup>N(Boc)<sub>2</sub></sup>), and (B) peptide **12** (Boc-Phe-Phe-*am*-A<sup>N(Boc)<sub>2</sub></sup>).

### Synthesis of dicationic peptide Boc-(L)-Lys-(L)-Lys-OMe:

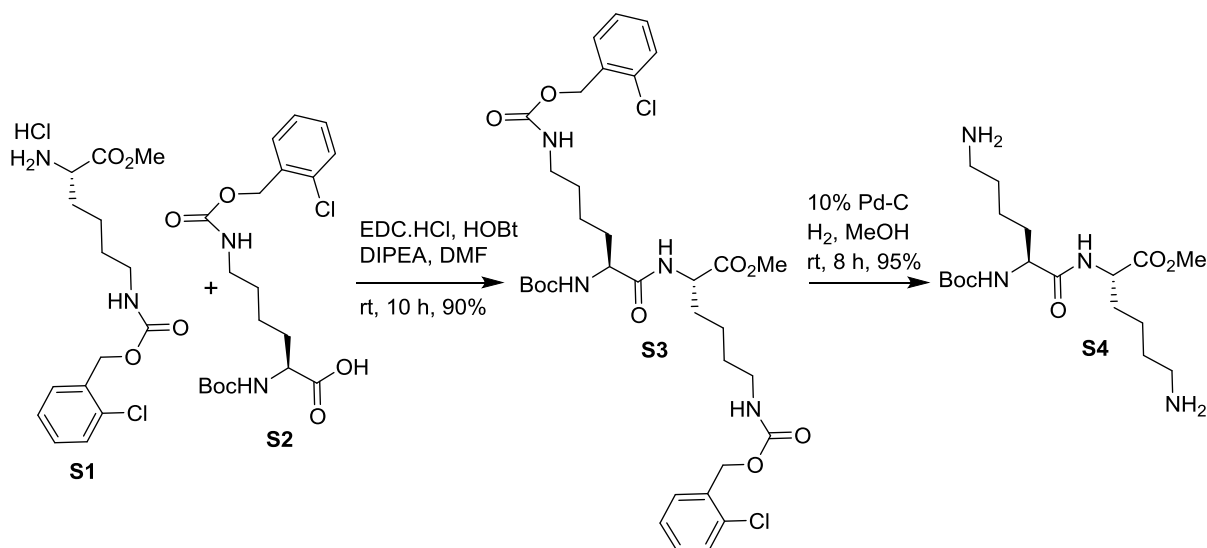

**Scheme S1:** Synthesis of dicationic peptide **S4**

Dicationic peptide **S4** [Boc-(L)-Lys-(L)-Lys-OMe] was synthesized after minor modification of the known procedure.<sup>1,2</sup> Commercially available (L)-Lys(*O*-Cl-Cbz)-OMe.HCl (**S1**; 0.44 gm, 1.20 mmol) and Boc-(L)-Lys(*O*-Cl-Cbz)-OH (**S2**; 0.50 gm, 1.20 mmol) were dissolved in dry DMF (10 mL). Diisopropylethylamine (DIPEA) (0.41 mL, 3.00 mmol) was added to the mixture and cooled to 0 °C in an ice bath. HOBT (0.16 gm, 1.20 mmol) and EDC.HCl (0.22 gm, 1.20 mmol) were added in portions into the reaction mixture and the reaction mixture was stirred for 1 h at 0 °C and kept at room temperature for overnight. EtOAc (100 mL) was added in to the reaction mixture. The organic layer was then washed successively with H<sub>2</sub>O (100 mL), 10% aqueous solution of NaHCO<sub>3</sub> (100 mL), 10% aqueous solution of citric acid (100mL), and with brine (300 mL). The organic layer was dried over anhyd Na<sub>2</sub>SO<sub>4</sub> and then evaporated under reduced pressure to give **S3** as a colorless viscous compound which was purified by flash column chromatography. The spectral data (NMR and HRMS) corresponded to the desired protected dipeptide **S3** (0.79 gm, 90% with respect to **S2**). <sup>1</sup>H NMR, 400 MHz (CDCl<sub>3</sub>, 25°C, TMS):  $\delta$  = 7.42-7.36 (m, 4H), 7.26-7.24 (m, 4H), 6.74 (brs, 1H), 5.25-5.17 (m, 5H), 5.09 (brs, 1H), 4.58-4.53 (m, 1H), 4.11-4.09 (m, 1H), 3.70 (s, 3H), 3.22-3.11 (m, 4H), 1.85-1.80 (m, 2H), 1.70-1.66 (m, 2H), 1.64-1.60 (m, 4H), 1.54-1.35 ppm (m, 13H); <sup>13</sup>C NMR, 100 MHz (CDCl<sub>3</sub>, 25°C, TMS)  $\delta$  = 172.8, 172.4, 156.6, 156.0, 134.5, 134.4, 133.8, 133.7, 130.1, 130.0, 129.7, 129.5, 127.1, 80.3, 64.1, 54.4, 52.7, 52.0, 40.6, 32.0, 31.7, 29.5, 29.3, 28.5, 22.4 ppm. HRMS (ESI<sup>+</sup>), *m/z* calculated for (M+H)<sup>+</sup> C<sub>34</sub>H<sub>47</sub>Cl<sub>2</sub>N<sub>4</sub>O<sub>9</sub>: 725.2720, found: 725.2719.

To a mixture of **S3** (0.50 gm, 0.69 mmol) in MeOH (10 mL), Pd/C (10%) (50 mg) was added into a flask. The mixture was stirred under H<sub>2</sub> atmosphere for 8 h, filtered through Celite-545 and evaporated under reduced pressure. The residue was then co-evaporated with CCl<sub>4</sub> and dried under high vacuum to afford peptide **S4** as a white solid (0.254 gm, 95%). Mp 226-228 °C (decomposes); <sup>1</sup>H NMR 400 MHz (DMSO-*d*<sub>6</sub>, 25°C)  $\delta$  =

8.31 (d,  $J = 7.3$  Hz, 1H), 8.06 (s, 4H), 6.85 (d,  $J = 8.1$  Hz, 1H), 4.23-4.14 (m, 1H), 4.02-3.86 (m, 1H), 3.61 (s, 3H), 2.79-2.66 (m, 4H), 1.68-1.43 (m, 8H), 1.37-1.28 ppm (m, 13H);  $^{13}\text{C}$  NMR, 100 MHz (DMSO- $d_6$ , 25°C):  $\delta = 172.4, 155.3, 77.8, 53.8, 51.8, 51.7, 38.4, 38.3, 31.2, 30.1, 28.2, 26.5, 26.4, 23.2, 22.3, 22.1$  ppm. HRMS (ESI $^+$ ),  $m/z$  calculated for (M+H) $^+$  C $_{18}$ H $_{37}$ N $_4$ O $_5$ : 389.2764, found: 389.2756.

### **Synthesis of Fmoc-Phe-Phe-*tz*-A $^{\text{N(Boc)}_2}$ (S7):**

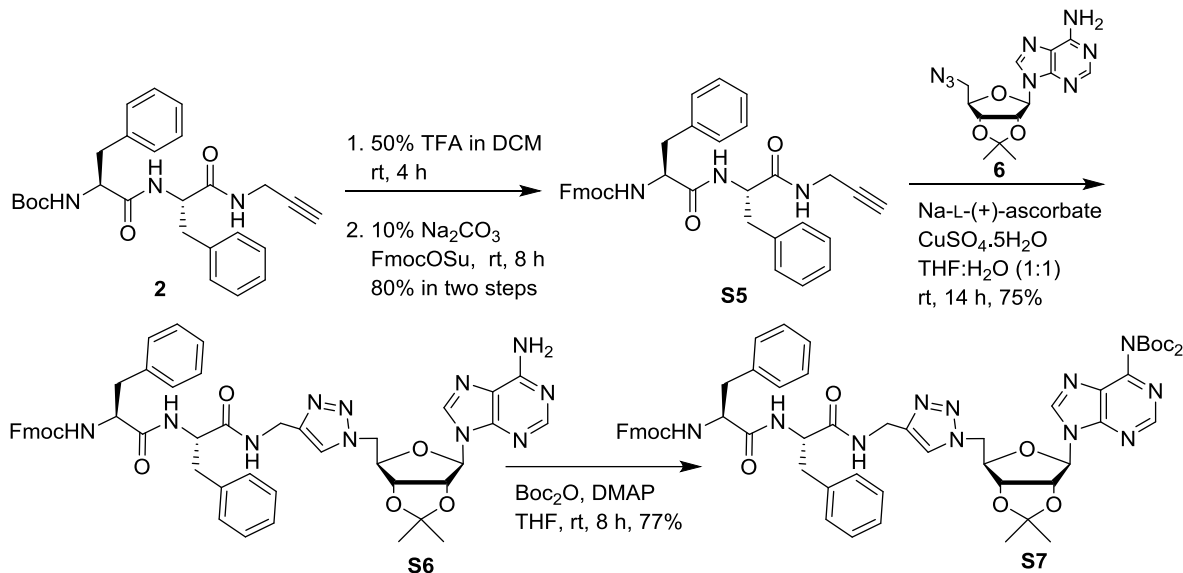

**Scheme S2:** Synthesis of Fmoc-Phe-Phe-*tz*-A $^{\text{N(Boc)}_2}$  (S7)

Compound **2** (1.0 g, 2.23 mmol) was stirred with trifluoroacetic acid (TFA) in DCM (20%, 10 mL) at room temperature. After 4 h, the volatile matters were evaporated to dryness under reduced pressure and residual liquid was co-evaporated with toluene (2x5 mL). The residue, thus obtained was subjected for next reaction without further purification. HRMS (ESI $^+$ ),  $m/z$  calculated for (M+H) $^+$  C $_{21}$ H $_{24}$ N $_3$ O $_2$ : 350.1868, found: 350.1869.

To a mixture of 10% Na $_2$ CO $_3$  solution (15 mL) and the crude residue, FmocOSu (0.83 gm, 2.45 mmol) was added slowly in portions at 0 °C and then kept at room temperature for 8 h. The reaction mixture was then acidified with satd KHSO $_4$  solution to adjust the pH between 4-5. The resulting aq solution was washed with EtOAc (20 X 3 mL). The combined organic layer was then washed successively with H $_2$ O (50 X 2 mL) and with brine (30 X 3 mL). Organic layer was dried over anhyd Na $_2$ SO $_4$  and then evaporated under reduced pressure to give **S3** as a white compound which was purified by column chromatography to obtain compound **S5** (1.02 g, 80% with respect to **2**) [Eluent: 0-5% of MeOH in DCM] as hygroscopic solid;  $^1\text{H}$  NMR 400 MHz (DMSO- $d_6$ , 25°C)  $\delta = 8.46$  (t,  $J = 5.4$  Hz, 1H), 8.15 (d,  $J = 8.2$  Hz, 1H), 7.88 (d,  $J = 7.6$  Hz, 2H), 7.61 (t,  $J = 8.3$  Hz, 2H), 7.55 (d,  $J = 8.8$  Hz, 1H), 7.40 (td,  $J = 7.4, 3.2$  Hz, 2H), 7.33 – 7.26 (m, 2H), 7.24 – 7.22 (m, 8H), 7.19 – 7.13 (m, 2H), 4.51 (dd,  $J = 13.6, 8.3$  Hz, 1H), 4.28 – 4.19 (m, 1H), 4.16 (dd,  $J = 14.4, 3.5$  Hz, 1H), 4.13 – 4.07 (m, 2H), 3.93 – 3.80 (m, 2H), 3.15 (t,  $J = 2.5$  Hz, 1H), 3.01 – 2.88 (m, 2H), 2.83 (dd,  $J = 13.7, 8.8$  Hz, 1H), 2.70

ppm (dd,  $J = 13.7, 10.7$  Hz, 1H);  $^{13}\text{C}$  NMR, 100 MHz (DMSO- $d_6$ , 25°C):  $\delta = 171.3, 170.6, 155.6, 143.8, 143.7, 140.64, 138.1, 137.4, 129.3, 129.2, 128.1, 128.0, 127.6, 127.1, 126.3, 126.2, 125.3, 125.2, 120.1, 80.8, 73.2, 65.6, 56.0, 53.8, 46.5, 39.5, 37.8, 37.4, 28.0$  ppm. HRMS (ESI $^+$ ),  $m/z$  calculated for (M+H) $^+$  C $_{36}$ H $_{34}$ N $_3$ O $_4$ : 572.2549, found: 572.2549.

A mixture of **S5** (0.57 g, 1.00 mmol), CuSO $_4$ ·5H $_2$ O (12 mg, 0.05 mmol) and sodium ascorbate (0.10 g, 0.5 mmol) were stirred in THF (6.0 mL). To the resulting suspension, azide **6** (0.36 g, 1.10 mmol) dissolved in THF (6.0 mL) was added. 10 mL distilled water was added to the reaction mixture and stirred at room temperature. After 12 h, EtOAc (20 mL) was added into it and aq layer was further washed with EtOAc (3 x 20 mL). Organic layer was separated, dried over anhyd Na $_2$ SO $_4$ , filtered and the filtrate was concentrated under reduced pressure. The crude mass thus obtained, was purified by column chromatography [Eluent: 0-5% MeOH in DCM] to afford compound **S6** as white solid (0.69 g, 77% with respect to **S5**). Mp 130-133 °C;  $^1\text{H}$  NMR 400 MHz (DMSO- $d_6$ , 25°C)  $\delta = 8.45$  (t,  $J = 5.4$  Hz, 1H), 8.33 (s, 1H), 8.23 (s, 1H), 8.12 (d,  $J = 8.1$  Hz, 1H), 7.87 (d,  $J = 7.5$  Hz, 2H), 7.59 (dt,  $J = 22.0, 8.4$  Hz, 3H), 7.39 (t,  $J = 7.0$  Hz, 4H), 7.34 – 7.08 (m, 13H), 6.24 (d,  $J = 1.8$  Hz, 1H), 5.46 (dd,  $J = 6.3, 2.0$  Hz, 1H), 5.15 (dd,  $J = 6.2, 3.3$  Hz, 1H), 4.74 (dd,  $J = 14.0, 5.1$  Hz, 1H), 4.63 (dd,  $J = 13.9, 7.8$  Hz, 1H), 4.56 – 4.48 (m, 2H), 4.34 – 4.16 (m, 4H), 4.10 (dd,  $J = 14.4, 7.5$  Hz, 2H), 2.94 (td,  $J = 14.3, 4.7$  Hz, 2H), 2.82 (dd,  $J = 13.7, 8.4$  Hz, 1H), 2.75 – 2.66 (m, 1H), 1.52 (s, 3H), 1.31 ppm (s, 3H);  $^{13}\text{C}$  NMR, 100 MHz (DMSO- $d_6$ , 25°C):  $\delta = 171.2, 170.5, 156.2, 155.6, 152.8, 143.7, 143.7, 140.6, 138.0, 137.4, 129.3, 129.2, 129.2, 127.9, 127.6, 127.0, 126.2, 125.3, 125.2, 123.1, 120.0, 113.6, 89.1, 84.7, 83.3, 81.6, 79.2, 65.6, 56.0, 53.8, 51.1, 46.5, 39.5, 37.8, 37.4, 34.2, 26.9, 25.1$  ppm. HRMS (ESI $^+$ ),  $m/z$  calculated for (M+H) $^+$  C $_{49}$ H $_{50}$ N $_{11}$ O $_7$ : 904.3894, found: 904.3903.

**Fmoc-Phe-Phe-tz-A $^{\text{N(Boc)}_2}$  (S7):** To a mixture of **S6** (0.63 g, 0.69 mmol) in dry THF (50 mL), DMAP (8 mg, 0.07 mmol) was added. To the stirred suspension was added Boc $_2$ O (0.36 g, 1.66 mmol) under an Ar atmosphere. The reaction mixture was stirred for 8 h at room temperature, at which point TLC analysis indicated completion of the reaction. The excess amount of THF was evaporated under reduced pressure. The residue thus obtained was purified by column chromatography [Eluent: 20-70% EtOAc in hexane] to afford peptide **S7** as white solid (0.59 g, 77%). Mp 114-117 °C;  $^1\text{H}$  NMR, 400 MHz (CDCl $_3$ , 25°C)  $\delta = 8.82$  (s, 1H), 8.69 (t,  $J = 8.1$  Hz, 0.5H), 8.42 (s, 0.5H), 8.03 (s, 1H), 7.81 – 7.62 (m, 2H), 7.44 (t,  $J = 7.8$  Hz, 2H), 7.34 (d,  $J = 7.5$  Hz, 2H), 7.26 – 7.13 (m, 7H), 7.04 (dd,  $J = 15.5, 8.3$  Hz, 6H), 6.96 (d,  $J = 6.4$  Hz, 1H), 6.13 – 5.95 (m, 2H), 5.82 (d,  $J = 7.2$  Hz, 1H), 5.34 – 5.23 (m, 1H), 5.14 (dd,  $J = 6.4, 3.6$  Hz, 1H), 4.73 – 4.41 (m, 6H), 4.36 – 4.22 (m, 3H), 4.17 – 3.99 (m, 2H), 2.97 – 2.88 (m, 4H), 2.68 (s, 1H), 1.52 – 1.51 (m, 8H), 1.47 – 1.37 (m, 13H), 1.29 ppm (s, 3H);  $^{13}\text{C}$  NMR (100 MHz, CDCl $_3$ )  $\delta = 171.1, 170.7, 156.1, 153.1, 152.3, 152.2, 150.8, 150.6, 150.2, 149.9, 144.7, 144.2, 143.8, 143.7, 141.9, 141.2, 136.4, 136.4, 129.4, 129.3, 128.6, 128.4, 127.7, 127.1, 127.0,$

126.8, 125.2, 125.1, 123.4, 122.3, 120.0, 115.2, 115.1, 90.3, 85.1, 84.2, 83.8, 83.8, 82.3, 81.6, 77.5, 77.2, 76.8, 67.1, 56.2, 54.3, 51.3, 47.00, 38.3, 38.1, 34.8, 28.1, 27.8, 27.8, 27.1, 25.3 ppm. . HRMS (ESI<sup>+</sup>), m/z calculated for (M+H)<sup>+</sup> C<sub>59</sub>H<sub>66</sub>N<sub>11</sub>O<sub>11</sub>: 1104.4940, found: 1104.4924.

## References:

1. (a) H. Xu and D. M. Rudkevich, *Chem. Eur. J.*, 2004, **10**, 5432-5442; (b) D. M. Rudkevich, G. A. Woldemariam and H. Xu, *Polym. Prepr.*, 2005, **6**, 1162-1163.
2. V. Stastny, A. Anderson and D. M. Rudkevich, *J. Org. Chem.*, 2006, **71**, 8696-8705.
